# Supplementary material for: Effect of a web drama video series on HIV and other sexually transmitted infection testing among gay, bisexual and queer men: study protocol for a community-based, pragmatic randomised controlled trial in Singapore: the People Like Us (PLU) Evaluation Study
Source: PubMed Central journal article supplement — BMJ Open. 2020 Apr 7;10(4):e033855. doi: 10.1136/bmjopen-2019-033855 (PMC7170638; doi:10.1136/bmjopen-2019-033855), 2020-04-07
Supplement: bmjopen-2019-033855.draft_revisions.pdf [file bmjopen-2019-033855.draft_revisions.pdf]

# BMJ Open

BMJ Open is committed to open peer review. As part of this commitment we make the peer review history of every article we publish publicly available.

When an article is published we post the peer reviewers' comments and the authors' responses online. We also post the versions of the paper that were used during peer review. These are the versions that the peer review comments apply to.

The versions of the paper that follow are the versions that were submitted during the peer review process. They are not the versions of record or the final published versions. They should not be cited or distributed as the published version of this manuscript.

BMJ Open is an open access journal and the full, final, typeset and author-corrected version of record of the manuscript is available on our site with no access controls, subscription charges or pay-per-view fees (<http://bmjopen.bmj.com>).

If you have any questions on BMJ Open's open peer review process please email [info.bmjopen@bmj.com](mailto:info.bmjopen@bmj.com)

# BMJ Open

**Effect of a web drama video series on HIV and other sexually transmitted infection testing among gay, bisexual and queer men: study protocol for a community-based, pragmatic, randomised controlled trial – the People Like Us (PLU) Evaluation Study**

|                               |                                                                                                                                                                                                                                                                                                                                                                                                                                                                                                                                                                                                                                                                                                                                                                                                                                            |
|-------------------------------|--------------------------------------------------------------------------------------------------------------------------------------------------------------------------------------------------------------------------------------------------------------------------------------------------------------------------------------------------------------------------------------------------------------------------------------------------------------------------------------------------------------------------------------------------------------------------------------------------------------------------------------------------------------------------------------------------------------------------------------------------------------------------------------------------------------------------------------------|
| Journal:                      | <i>BMJ Open</i>                                                                                                                                                                                                                                                                                                                                                                                                                                                                                                                                                                                                                                                                                                                                                                                                                            |
| Manuscript ID                 | bmjopen-2019-033855                                                                                                                                                                                                                                                                                                                                                                                                                                                                                                                                                                                                                                                                                                                                                                                                                        |
| Article Type:                 | Protocol                                                                                                                                                                                                                                                                                                                                                                                                                                                                                                                                                                                                                                                                                                                                                                                                                                   |
| Date Submitted by the Author: | 27-Aug-2019                                                                                                                                                                                                                                                                                                                                                                                                                                                                                                                                                                                                                                                                                                                                                                                                                                |
| Complete List of Authors:     | Tan, Rayner Kay Jin; National University Singapore Saw Swee Hock School of Public Health,<br>Koh, Wee Ling; National University Singapore Saw Swee Hock School of Public Health<br>Le, Daniel; Action for AIDS Singapore<br>Tan, Avin; Action for AIDS Singapore<br>Tyler, Adrian; Action for AIDS Singapore<br>Tan, Calvin; Action for AIDS Singapore<br>Banerjee, Sumita; Action for AIDS Singapore<br>Wong, Chen Seong; National Centre for Infectious Diseases; National University Singapore Yong Loo Lin School of Medicine<br>Wong, Mee-Lian; National University Singapore Saw Swee Hock School of Public Health<br>Chio, Martin; National Skin Centre, Department of STI Control (DSC) Clinic<br>Chen, Mark I-Cheng; National University Singapore Saw Swee Hock School of Public Health; National Centre for Infectious Diseases |
| Keywords:                     | HIV & AIDS < INFECTIOUS DISEASES, INFECTIOUS DISEASES, Epidemiology < INFECTIOUS DISEASES, Public health < INFECTIOUS DISEASES, SOCIAL MEDICINE                                                                                                                                                                                                                                                                                                                                                                                                                                                                                                                                                                                                                                                                                            |
|                               |                                                                                                                                                                                                                                                                                                                                                                                                                                                                                                                                                                                                                                                                                                                                                                                                                                            |

SCHOLARONE™  
Manuscripts

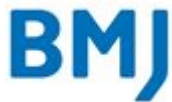

I, the Submitting Author has the right to grant and does grant on behalf of all authors of the Work (as defined in the below author licence), an exclusive licence and/or a non-exclusive licence for contributions from authors who are: i) UK Crown employees; ii) where BMJ has agreed a CC-BY licence shall apply, and/or iii) in accordance with the terms applicable for US Federal Government officers or employees acting as part of their official duties; on a worldwide, perpetual, irrevocable, royalty-free basis to BMJ Publishing Group Ltd ("BMJ") its licensees and where the relevant Journal is co-owned by BMJ to the co-owners of the Journal, to publish the Work in this journal and any other BMJ products and to exploit all rights, as set out in our [licence](#).

The Submitting Author accepts and understands that any supply made under these terms is made by BMJ to the Submitting Author unless you are acting as an employee on behalf of your employer or a postgraduate student of an affiliated institution which is paying any applicable article publishing charge ("APC") for Open Access articles. Where the Submitting Author wishes to make the Work available on an Open Access basis (and intends to pay the relevant APC), the terms of reuse of such Open Access shall be governed by a Creative Commons licence – details of these licences and which [Creative Commons](#) licence will apply to this Work are set out in our licence referred to above.

Other than as permitted in any relevant BMJ Author's Self Archiving Policies, I confirm this Work has not been accepted for publication elsewhere, is not being considered for publication elsewhere and does not duplicate material already published. I confirm all authors consent to publication of this Work and authorise the granting of this licence.

1  
2  
3 **Effect of a web drama video series on HIV and other sexually transmitted infection**  
4 **testing among gay, bisexual and queer men: study protocol for a community-based,**  
5 **pragmatic, randomised controlled trial – the People Like Us (PLU) Evaluation Study**  
6  
7  
8  
9  
10  
11

12 **Authors:**

13  
14  
15 Rayner Kay Jin Tan<sup>1</sup>, Wee Ling Koh<sup>1</sup>, Daniel Le<sup>2,†</sup>, Avin Tan<sup>2</sup>, Adrian Tyler<sup>2</sup>, Calvin Tan<sup>2</sup>,

16  
17  
18 Sumita Banerjee<sup>2</sup>, Chen Seong Wong<sup>3,4</sup>, Wong Mee Lian<sup>1</sup>, Martin Tze-Wei Chio<sup>5</sup>, Mark I-  
19  
20 Cheng Chen<sup>1,4</sup>  
21  
22

23  
24  
25 <sup>1</sup>Saw Swee Hock School of Public Health, National University of Singapore, Singapore

26  
27 <sup>2</sup>Action for AIDS Singapore, Singapore

28  
29 <sup>3</sup>Yong Loo Lin School of Medicine, National University of Singapore, Singapore

30  
31 <sup>4</sup>National Centre for Infectious Diseases, Singapore

32  
33 <sup>5</sup>Department of STI Control (DSC) Clinic, National Skin Centre, Singapore

34  
35  
36  
37  
38  
39 <sup>†</sup> Co-author's current affiliation is at the National University Hospital, National University  
40  
41  
42 Health System, Singapore  
43  
44  
45  
46

47 **Corresponding author:**

48  
49 Name: Mr Rayner Kay Jin Tan

50  
51 Address: Saw Swee Hock School of Public Health, Tahir Foundation Building, National  
52  
53 University of Singapore, 12 Science Drive 2, #10-01, Singapore 117549

54  
55 Telephone number: (65) 9187 8576

56  
57  
58 Email: rayner.tan@u.nus.edu  
59  
60

1  
2  
3  
4  
5  
6  
7  
8  
9  
10  
11  
12  
13  
14  
15  
16  
17  
18  
19  
20  
21  
22  
23  
24  
25  
26  
27  
28  
29  
30  
31  
32  
33  
34  
35  
36  
37  
38  
39  
40  
41  
42  
43  
44  
45  
46  
47  
48  
49  
50  
51  
52  
53  
54  
55  
56  
57  
58  
59  
60

For peer review only

1  
2  
3 **Effect of a web drama video series on HIV and other sexually transmitted infection**  
4 **testing among gay, bisexual and queer men: study protocol for a community-based,**  
5 **pragmatic, randomised controlled trial – the People Like Us (PLU) Evaluation Study**  
6  
7  
8  
9  
10  
11

12 **Abstract**  
13

14 **Introduction:** Gay, bisexual and queer (GBQ) men are at disproportionately higher risk of  
15 acquiring HIV and other sexually transmitted infections. While HIV/STI testing rates among  
16 GBQ men are increasing worldwide, they remain suboptimal in a variety of settings.  
17  
18

19 **Methods and analysis:** The study is a pragmatic, randomised controlled trial design to  
20 evaluate an online video series developed by a community-based organisation in Singapore  
21 for GBQ men. A total of 300 HIV-negative, GBQ men in Singapore aged 18 to 29 years old  
22 will be recruited for this study. Participants will subsequently be randomised into the  
23 intervention arm (n=150) and the control arm (n=150). The intervention arm (n=150) will be  
24 assigned the intervention along with sexual health information via a pamphlet, while the  
25 control group (n=150) will be assigned only the sexual health information via a pamphlet.  
26  
27 Participants should also not have watched the video prior to their participation in this study,  
28 which will be ascertained through a questionnaire. Primary outcomes for this evaluation are  
29 changes in self-reported intention to test for, actual testing for, and regularity of testing for  
30 HIV, Syphilis, Chlamydia and Gonorrhoea at the 3-month and 6-month post-intervention.  
31  
32 Secondary outcomes include changes in self-reported risk perception for HIV and other  
33 sexually transmitted infections, knowledge of HIV, knowledge of risks associated with  
34 acquiring sexually transmitted infections, knowledge of HIV pre-exposure prophylaxis,  
35 consistent condom use for anal sex with casual partners, incidence of sexually transmitted  
36 infections, connectedness to the lesbian, gay, bisexual and transgender (LGBT) community,  
37  
38  
39  
40  
41  
42  
43  
44  
45  
46  
47  
48  
49  
50  
51  
52  
53  
54  
55  
56  
57  
58  
59  
60

1  
2  
3 self-concealment of sexual orientation, perceived homophobia, internalised homophobia,  
4  
5 HIV testing self-efficacy and HIV testing social norms.  
6

7  
8 **Ethics and dissemination:** The study has been approved by the National University of  
9  
10 Singapore Institutional Review Board (S-19-059) and registered at Clinicaltrials.gov  
11  
12 (NCT04021953). The results will be published in peer-reviewed academic journals and  
13  
14 disseminated to community-based organisations and policymakers.  
15  
16

17  
18  
19 **Trial registration:** Clinicaltrials.gov, NCT04021953  
20  
21

## 22 23 24 **Article summary**

### 25 26 *Strengths and limitations of this study*

- 27  
28 • The first randomised controlled trial to evaluate the efficacy of a popular web-based  
29  
30 drama series on HIV/STI testing for young gay, bisexual and queer men in Singapore
- 31  
32 • A collaboration with a community-based organisation in Singapore with strong public  
33  
34 health translation potential
- 35  
36 • Only self-reported data on HIV and other STI diagnoses are collected which cannot be  
37  
38 validated through laboratory-confirmed tests
- 39  
40 • While steps have been taken to mitigate contamination, the risks nonetheless exist as the  
41  
42 intervention material is available to the public
- 43  
44 • Sex between men is criminalised in Singapore which may impact participation among  
45  
46 sub-populations of the target population
- 47  
48  
49  
50  
51  
52  
53  
54  
55  
56  
57  
58  
59  
60

## Introduction

A total of 37.9 million people around the world were estimated to be living with HIV at the end of 2018 [1]. Gay, bisexual and queer (GBQ) men are at disproportionately higher risk of acquiring HIV, relative to the general population [2, 3]. Young GBQ men are a subset of the broader GBQ male community who are especially vulnerable to HIV and other sexually transmitted infections (STI) acquisition. In Singapore, GBQ men between the age of 15 to 39 years old account for 66.3% of all incident HIV cases among GBQ men from the first reported case of HIV in 1986, up to 2018 [4].

Rates of HIV testing have also remained suboptimal among GBQ men in a variety of settings, including Southeast Asia. A study among young GBQ men in the Association of Southeast Asian Nations countries in 2015 found that 29.9% of participants had never had an HIV test, and these were more likely to be among younger GBQ men [5]. Unwillingness to know about their HIV status, the fear of a positive result, and low perceived risk of HIV acquisition were factors found to be associated with lower rates of HIV testing among young GBQ men [6, 7].

As such, there exist numerous types of interventions that aim to increase HIV testing among GBQ men. These interventions range from those that utilise aspects of peer education, outreach through social media, reminder-based systems, video-based interventions and national social marketing campaigns. These social marketing campaigns were commonly promoted in neighbourhoods where a larger population of GBQ men resided and had substantial number of businesses catering to them [8-12]. For reminder-based interventions, participants were recruited from sexual health clinics that they were, at the point of recruitment, attending, either for check-ups or testing [13-15]. With regards to the other online interventions such as outreach through social media and peer education, participants



1  
2  
3 were recruited through key websites and mobile phone apps identified to be frequented by  
4  
5 GBQ men [16-22].  
6

7  
8 These interventions reported varying degrees of effectiveness in achieving the aims of  
9  
10 increasing HIV testing and overall disease awareness. Reminder-based interventions, where  
11  
12 participants were reminded every three to six months to go for testing through short message  
13  
14 reminders sent from designated sexual health clinics, were customised to suit the participants'  
15  
16 level of sexual activity and were effective in promoting the uptake of HIV testing [13-15].  
17  
18 Broader scale HIV/STI social marketing campaigns, such as "Stop the Sores" and "Stop the  
19  
20 Drama Downunder" from the United States and Australia respectively, were generally well-  
21  
22 received and were found to be effective in promoting HIV/STI testing, as well as  
23  
24 participants' knowledge on HIV/STI at the population or community level [9, 11].  
25  
26 Interventions that collaborated with popular opinion leaders to disseminate HIV prevention  
27  
28 messages to GBQ male social networks have also shown success in encouraging desired HIV  
29  
30 preventive behaviours [19, 20]. However, for existing video-based interventions, evidence of  
31  
32 their efficacies was not conclusive. In a video-based intervention study conducted in Peru  
33  
34 between 2007 to 2008, among participants who self-identified as gay, differences in intention  
35  
36 to test for HIV was not statistically significant between the intervention and control arm,  
37  
38 although participants who identified as non-gay did show increased willingness to do so [22].  
39  
40 Several studies also assessed the efficacy of crowdsourced videos on HIV testing, and largely  
41  
42 found that they were non-inferior to regular health marketing campaigns [18], or only had a  
43  
44 positive effect on HIV testing rates through the use of home-based self-testing kits, but not  
45  
46 facility-based HIV/STI testing [23].  
47  
48  
49  
50  
51  
52

53  
54 There are, however, several limitations in the context of reach and feasibility for such  
55  
56 interventions. For example, reminder-based and peer education-based interventions require  
57  
58 existing health systems that can support such interventions, which may not be feasible in most  
59  
60

1  
2  
3 settings that do not have such services, or where GBQ male-specific clinical services are  
4  
5 unavailable due to the criminalisation of sex between men. Furthermore, while social  
6  
7 marketing campaigns have been effective in increasing the uptake of HIV/STI testing, such  
8  
9 campaigns may not be feasible in Asian settings where negative perceptions of, or attitudes  
10  
11 toward GBQ men prevail [5]. Overall, these interventions also fell short of reaching out to  
12  
13 more niche subsets of the GBQ male communities who may be more discreet about their  
14  
15 sexual identities and hence may not often visit gay venues or sexual health clinics where  
16  
17 these interventions are typically offered.  
18  
19

20  
21 The present study is novel in Asia in evaluating the effectiveness of a web drama  
22  
23 series in achieving positive HIV/STI testing-related outcomes for young GBQ men. The  
24  
25 videos used in the study forms the second season of an educational and web drama  
26  
27 miniseries, People Like Us (PLU), developed by gayhealth.sg and Action for AIDS (AFA) in  
28  
29 2018. The first season of the miniseries was screened as a total of 10 film festivals, and won  
30  
31 several independent film awards. It had also garnered more than 1.7 million views across  
32  
33 various social media platforms since its launch in 2016. In spite of its popularity, little has  
34  
35 been done to assess its efficacy in positively impacting HIV/STI testing-related outcomes. If  
36  
37 found to be efficacious in improving HIV/STI testing-related outcomes, such web dramas  
38  
39 may serve as complementary interventions, alongside clinically-based ones, as such web  
40  
41 drama series have proven to be easily accessible and shareable, which may facilitate reaching  
42  
43 GBQ men who might not have access healthcare services as a result of key structural barriers,  
44  
45 such as stigma.  
46  
47  
48  
49  
50

## 51 52 53 **Methods and analysis**

### 54 55 *Study aims and design* 56 57 58 59 60

1  
2  
3 This is a pragmatic, parallel group, randomised controlled trial to evaluate the  
4 efficacy of a web drama series, developed by a community-based organisation in Singapore,  
5 in increasing an individual's intention to test, self-reported testing behaviors, and self-  
6 reported regularity of testing behaviors for HIV, Syphilis, as well as other common sexually  
7 transmitted infection [24] such as Gonorrhoea and Chlamydia. The trial also aims to evaluate  
8 the impact of the web drama series on self-reported risk perception for HIV/STI, knowledge  
9 of HIV, risks associated with acquiring sexually transmitted infections and HIV pre-exposure  
10 prophylaxis, consistent condom use for anal sex with casual partners, incidence of sexually  
11 transmitted infections, connectedness to the lesbian, gay, bisexual and transgender (LGBT)  
12 community, self-concealment of sexual orientation, perceived homophobia, internalised  
13 homophobia, HIV testing self-efficacy and HIV testing social norms. The pragmatic nature of  
14 this trial arises due to the prospect of contamination, as the web drama series had been  
15 launched in January 2019. The implications of this are further discussed later in the  
16 manuscript.

### 17 18 19 20 21 22 23 24 25 26 27 28 29 30 31 32 33 34 35 36 37 38 *Study setting*

39  
40 As of end-2018, a total of 8,295 Singaporeans had been reported to the Ministry of  
41 Health (MOH) in Singapore as having acquired HIV [25]. HIV transmission in Singapore is  
42 concentrated among key populations, namely among GBQ men and heterosexual men. HIV  
43 testing is widely available at both government-run and private healthcare providers in  
44 Singapore, and under the Infectious Disease Act in Singapore, all individuals who test  
45 positive for HIV must be notified to the MOH within 72 hours of diagnosis. The anonymous  
46 HIV testing scheme was introduced in 1991; under this scheme, no personal information or  
47 identifiers are collected during HIV testing at selected clinics to encourage testing among  
48  
49  
50  
51  
52  
53  
54  
55  
56  
57  
58  
59  
60

1  
2  
3 individuals who might otherwise be hesitant of having their identities made known to the  
4  
5 authorities.  
6

7  
8 Singapore society has largely held negative attitudes towards GBQ men and  
9  
10 individuals who identify as lesbian, gay, bisexual, and transgender (LGBT) [26-28]. Legally,  
11  
12 sexual relations between consenting male individuals is also criminalised under Section 377A  
13  
14 of the Singapore penal code, with a penalty of imprisonment for up to two years. A recent  
15  
16 study found that Singaporeans were also not in favor of its repeal [29]. Past studies in  
17  
18 Singapore have found that negative attitudes and structural forms of stigma and  
19  
20 discrimination have a negative impact on HIV/STI testing among GBQ men [30, 31]. As  
21  
22 such, interventions that do not operate beyond community spaces or sexual health clinics may  
23  
24 not reach hidden populations of GBQ men who may fear attending or being seen in such  
25  
26 spaces that might inadvertently lead to the disclosure of their sexual orientation.  
27  
28  
29  
30  
31  
32

### 33 *Inclusion and exclusion criteria*

34  
35 Inclusion criteria for participants in this study include self-reporting at the point of  
36  
37 recruitment (i) an HIV-negative status, or being unsure of one's HIV status; (ii) being gay,  
38  
39 bisexual or queer with regard to sexual orientation; (iii) being of male gender, regardless of  
40  
41 sex assigned at birth; (iv) being 18 to 29 years old; (v) being a Singapore citizen or  
42  
43 permanent resident; (vi) and having never watched an online video drama series by  
44  
45 Gayhealth.sg or AFA in the last year.  
46  
47  
48

49  
50 Exclusion criteria for participants in this study include self-reporting at the point of  
51  
52 recruitment (i) having ever watched an online video drama series by Gayhealth.sg or AFA in  
53  
54 the last year; (ii) an HIV-positive status; (iii) not being English-literate; and (iv) being below  
55  
56 18 or above 29 years old.  
57  
58  
59  
60

1  
2  
3 *Procedure and randomisation*  
4  
5  
6  
7

8 **<Figure 1 about here>**  
9

10  
11  
12 A summary of study procedures may be found in Figure 1. Recruitment of  
13 participants will take place through the assistance of community-based organisations in  
14 Singapore, as well as through advertising channels in popular social and sexual networking  
15 apps among young GBQ men. Flyers will be printed and placed at the premises run by  
16 community-based organisations, while social media campaigns will be run on social media  
17 and geosocial networking platforms to recruit participants. To enrol in the study, participant  
18 will have to scan a QR code or follow the direct link on the flyer, or click a link on the online  
19 advertisement to access a study enrolment questionnaire. Participants will provide consent for  
20 participation through an online participant information sheet at this point.  
21  
22  
23  
24  
25  
26  
27  
28  
29  
30  
31  
32

33 Participants will follow the link on the online advertisement or flyer to a survey  
34 administration website for a short screening survey where they will be asked for their contact  
35 details as well as their self-reported age, sexual orientation, gender, HIV status, and residence  
36 status to register their intent to join the cohort and for verification of eligibility by the  
37 community-based organisational partner, AFA. Participants will also be asked if they had  
38 ever watched a web drama series by Gayhealth.sg or AFA launched in the past year without  
39 naming the actual series to avoid further contamination. Should the participant be ineligible  
40 to participate, they will be redirected to a disqualification page. Throughout the entire survey  
41 process, personal identifiers will never be directly linked to survey results, so as to protect  
42 participants from potential criminal implications of disclosing their sexual activities with  
43 other men and other behaviors such as substance use.  
44  
45  
46  
47  
48  
49  
50  
51  
52  
53  
54  
55  
56  
57  
58  
59  
60

1  
2  
3 Upon completion of the enrolment survey and verification of eligibility, a staff  
4 member at AFA will contact eligible participants to provide them with their participant ID,  
5 and to formally invite them to participate in the study through the completion of the first  
6 online baseline survey. This survey will be hosted on a survey administration website and  
7 will take about 15 to 20 minutes to complete. Participants will be prompted to enter their  
8 participant ID at the start of the survey so that upon completion, the research team will be  
9 able to notify the team at AFA on the completion of the survey, which will allow for direct  
10 disbursement of a SGD15.00 (~USD10.84) reimbursement to participants. AFA will not have  
11 access to any baseline or follow-up survey responses for the cohort questionnaire, which will  
12 only be made available to the study team.  
13  
14  
15  
16  
17  
18  
19  
20  
21  
22  
23  
24  
25

26 Upon completion of the baseline survey, participants will then be randomly assigned  
27 via block randomisation (in block sizes of 5) to the intervention condition or the control  
28 comparison condition using a computer software program. Individuals who are assigned to  
29 the intervention condition will be given a link to a series of six online videos from the PLU  
30 web drama series, along with a link to an online sexual health pamphlet tailored for GBQ  
31 men in Singapore. Individuals who were assigned to the control condition will be scheduled  
32 to receive a link to the same online sexual health pamphlet as the standard of care for GBQ  
33 men at risk of acquiring HIV/STI in Singapore. To ensure that all participants eventually  
34 receive both interventions, after the 6-month follow-up period is over, the control group will  
35 receive the link to the online videos as well. All participants will receive their assigned  
36 conditions within one week after completing the baseline survey, and will be asked to  
37 complete a quiz one week after assignment to ascertainment if participants had watched the  
38 online series and/or read the sexual health pamphlet. Participants will receive a SGD20.00  
39 (~USD14.45) reimbursement following the completion of the quiz.  
40  
41  
42  
43  
44  
45  
46  
47  
48  
49  
50  
51  
52  
53  
54  
55  
56  
57  
58  
59  
60

1  
2  
3 Participants will not be blinded to the group they have been assigned to, and will be  
4 told about their chances of being randomised to either group. However, participants will not  
5 have access to the content that would only be delivered at the 6-month mark. The decision to  
6 have access to the content that would only be delivered at the 6-month mark. The decision to  
7 provide both groups similar materials at different times ensures that the trial remains ethical,  
8 considering we anticipate improvements in sexual health-seeking behavior, and ensures that  
9 participants remain motivated to participate, knowing that they would receive similar  
10 treatments in spite of randomisation. At the 3-month and 6-month timeframes from the  
11 baseline, AFA will contact all eligible participants to continue with their follow-up surveys.  
12 Like the baseline survey, the second and third surveys will be hosted on a survey  
13 administration website and will take about 15 to 20 minutes to complete. Participants will  
14 receive SGD15.00 (~USD10.84) reimbursement for the completion of each survey.  
15  
16  
17  
18  
19  
20  
21  
22  
23  
24  
25  
26  
27  
28  
29  
30

31 *The intervention: People Like Us web drama series*

32  
33 The online intervention comprises a series of six videos, each about 10-minutes in  
34 length, constituting the second season of a popular web drama series entitled People Like Us.  
35 The series follow the love and sex lives of four ethnically-diverse GBQ men of varying  
36 socioeconomic backgrounds, as they negotiate issues of sexual health, mental health, and  
37 relationships throughout the six-part miniseries. People Like Us miniseries incorporates key  
38 sexual health messages to (i) increase viewers' knowledge and perceptions of HIV/STI risk;  
39 (ii) address homophobia and sexual orientation disclosure; (iii) increase safer-sex negotiation  
40 self-efficacy; (iv) promote positive attitudes towards condom use and other safe sex  
41 behaviors; (v) build skills and self-efficacy for practicing safer sex; (vi) provide information  
42 on HIV/STI testing and its benefits; (vii) provide information on resources for HIV/STI  
43 testing and other mental health services; and (viii) model appropriate behaviors around  
44 practicing safer sex. Each video in the six-part series ends with an educational video segment  
45  
46  
47  
48  
49  
50  
51  
52  
53  
54  
55  
56  
57  
58  
59  
60

1  
2  
3 featuring the managers and volunteers of AFA and Gayhealth.sg, who provide a brief  
4 synopsis of the episode and cover key points relevant to mental and sexual health for GBQ  
5 men. A list of episodes may also be found in Table 1.  
6  
7  
8  
9  
10  
11

12 *The control condition: Sexual health pamphlet*

13  
14 The intervention group will also be provided with an online sexual health pamphlet  
15 tailored specifically to the needs of GBQ men in Singapore. This pamphlet was developed by  
16 the National Skin Centre and Department of Sexually Transmitted Infections Clinic  
17 specifically for information on sexual wellness among GBQ men. It comprises segments on  
18 HIV/STI symptoms, aetiology, information on how to seek help for HIV/STI, as well as  
19 behavioral and biomedical methods of HIV prevention.  
20  
21  
22  
23  
24  
25  
26  
27  
28  
29  
30

31 *Primary outcome measures*

32  
33 Primary outcomes for this evaluation are changes in self-reported intention to test for,  
34 actual testing for, and regularity of testing for HIV, Syphilis, as well as Chlamydia and  
35 Gonorrhoea at the 3-month and 6-month time frames. For example, participants will be asked  
36 “how likely are you to get tested for HIV in the next three months?”, to which they respond  
37 through a 6-point Likert scale from “extremely unlikely to get tested” to “extremely likely to  
38 get tested”. Self-reported testing is ascertained through the question “when did you go for  
39 you last (most recent) voluntary HIV test?” (options to respond include “never”, “in the last 3  
40 months”, “in the last 6 months”, “6 to 12 months ago” and “more than 1 year ago”), while  
41 self-reported regularity of testing will be measured through the question “on average, how  
42 regularly do you test for HIV?” (options to respond include “I do not test regularly”, “once  
43 every few years”, “once a year”, “once every 6 months”, “once every 3 months” and “once a  
44 month”).  
45  
46  
47  
48  
49  
50  
51  
52  
53  
54  
55  
56  
57  
58  
59  
60



### *Secondary outcome measures*

Secondary outcomes include changes in self-reported risk perception for HIV/STI, knowledge of HIV, knowledge of risks associated with acquiring sexually transmitted infections, knowledge of HIV pre-exposure prophylaxis, self-reported consistent condom use for anal sex with casual partners, self-reported incidence of sexually transmitted infections, connectedness to the lesbian, gay, bisexual and transgender (LGBT) community [32], self-concealment of sexual orientation [33], perceived homophobia [34], internalised homophobia [35], HIV testing self-efficacy [36] and HIV testing social norms [37].

### *Sample size*

As the primary outcome of interest includes HIV or other STI testing in the last 3 months, we utilise data from a recent study conducted in 2018 among 1,098 GBQ men recruited through Grindr, the popular geosocial networking app [31, 38]. The study found that 50.4% of respondents reported having had a recent HIV test in the 6 months prior to the survey. Assuming a 50% increase in recent HIV testing as a result of the intervention, as data from previous studies based on the impact such a web drama series on recent HIV testing remains limited [39], a sample size of 112 in each arm will yield statistical power higher than 80% to detect a significant change for the intervention. A target sample size of 150 participants per group is proposed to account for an attrition estimate of 25% for each group across the 6-month follow up. Intention to Treat Analysis (ITT) will be employed to assess intervention efficacy on the proposed outcomes. Per-protocol analysis will also be conducted to assess the impact of attrition. Intervention efficacy will be analyzed over the entire study period (from baseline to the 6-month assessment).

### *Statistical analyses*

The baseline equivalence of sociodemographic characteristics and sexual behavior in the intervention and comparison groups will be compared and statistically significant variables between the comparison and intervention group would be adjusted in the outcome evaluation along with the outcome at baseline. For continuous variables, a generalised linear mixed model will be employed. The mixed models will include intervention status and the time-point of assessment as fixed effects, and individuals as a random effect. Between-group effect sizes for the continuous outcome variables will be calculated using post-treatment means and their pooled observed standard deviation. For binary or count outcome variable evaluation, Poisson regression models and calculation of robust standard errors will be used to compute the crude risk ratio (RR) and adjusted RR (aRR) of the outcomes in the intervention versus the comparison group at follow-up. The default standard errors obtained by Poisson regression are typically too large; therefore, robust standard errors are needed to obtain an accurate confidence interval around the RR. Poisson rather than logistic regression will be used as the outcome was common (>10% of the study population), and thus the OR would likely overestimate the RR.

### *Pragmatic nature of trial*

The PLU web drama series was launched in the community prior to the start of this study, and thus members of the community might have been exposed to the intervention prior to the study. However, this study was designated to continue in view of its importance in the local context to evaluate the efficacy of such web drama series, and to justify further HIV/STI prevention efforts that utilise online channels. As such, there is a possibility that control group participants may be exposed to the video series during the 6-month study period. To mitigate this, we will ensure that details of the online video intervention (i.e. title

1  
2  
3 of web series, where to access it) will not be included in the participant information sheet –  
4  
5 only basic information on the possibility that they may be randomised to an “online video  
6  
7 intervention” will be mentioned. Furthermore, to reduce the possibility of contamination  
8  
9 occurring in reaction to being asked the screening question, we will avoid using the title of  
10  
11 the web-series but instead ask the question: “Have you ever watched an online video drama  
12  
13 series filmed by Gayhealth.sg or Action for AIDS Singapore in the past year?” as this is  
14  
15 Gayhealth.sg/AFA’s only web series launched in the past year. We will also ask participants  
16  
17 at the 6-month mark if they had watched the video series within the past 6-months, and the  
18  
19 time-frame during which they watched the web series. Intention-to-treat analyses will be  
20  
21 conducted to provide a conservative estimate of the effect of the intervention, regardless of  
22  
23 contamination.

24  
25  
26  
27  
28 A contamination adjusted intention-to-treat (CAITT) analysis may also be performed  
29  
30 [40]. The authors argue that “as-treated” and “per-protocol” analyses result in non-random  
31  
32 omission bias, while “intention-to-treat” analyses underestimate the value of receiving the  
33  
34 treatment. In CAITT, the randomised controlled trial is treated as an instrumental variable,  
35  
36 with treatment assignment as the “instrument.” The effect of treatment assignment on  
37  
38 outcome observed (intention to treat analysis) is adjusted by the percentage of assigned  
39  
40 participants who ultimately receive the treatment (contamination adjustment). The authors  
41  
42 argue that this provides a good estimate of an individual’s risks and benefits of receiving a  
43  
44 treatment, but might overestimate population level treatment benefits.

### 51 *Patient and Public Involvement*

52  
53 The research protocol and grant application for this evaluation study was developed in  
54  
55 collaboration with AFA, and its GBQ health programme, Gayhealth.sg. Both AFA and  
56  
57 Gayhealth.sg represent the health interests of the wider GBQ male community and were  
58  
59  
60

1  
2  
3 instrumental in the design and development of the study protocol. The intervention was  
4  
5 developed by Gayhealth.sg and Action for AIDS Singapore in 2018 following a community  
6  
7 needs assessment exercise that identified the pertinent sexual and mental health issues in the  
8  
9 local GBQ male community. Results of the study will be disseminated to participants and the  
10  
11 wider GBQ male community through both scientific seminars and community-based  
12  
13 symposia, as well as through written, open-access reports.  
14  
15  
16  
17  
18

## 19 **Ethics and dissemination**

### 20 *Ethics and mitigating potential risks*

21  
22  
23  
24 Ethical issues may arise from the recruitment of participants engaging in illegal or  
25  
26 criminal activities, such as the self-disclosure of having sex with other men, sex with minors,  
27  
28 and the use of recreational drugs. To mitigate this risk, the main research team will not have  
29  
30 access to any participant's personal identifiers, or access to any participants directly, which  
31  
32 will be carried out by AFA. AFA will only collect participants' contact information to assist  
33  
34 in following up on the surveys, and these will be stored in an encrypted database. On the  
35  
36 other hand, staff at AFA will not have access to the survey data containing individual  
37  
38 responses. All participants will be assigned a study identification number and these will  
39  
40 subsequently be used for communication purposes to ensure that no personal identifiers are  
41  
42 reflected or stored beyond the encrypted database.  
43  
44  
45  
46  
47  
48

### 49 *Dissemination and implications for health promotion and policy*

50  
51  
52 Results of the study will be made available to the public to share the results of the  
53  
54 study with the GBQ male community, and to inform policymakers. Specifically, results of the  
55  
56 study will be communicated in writing through study reports and peer-reviewed journal  
57  
58 articles, and through presentations made in the community, at scientific conferences, and at  
59  
60

1  
2  
3 policy meetings. If found to be effective, such web drama series hold great promise to  
4  
5 improve HIV/STI testing among GBQ men in Singapore, who are at disproportionate risk of  
6  
7 acquiring HIV/STI relative to the general population. The organic growth and reach of the  
8  
9 web drama series makes it a cost-effective means of improving such sexual health outcomes  
10  
11 among GBQ men, and may serve as a model for other online interventions in Asia, and in  
12  
13 contexts where sexual relations between men remain criminalised.  
14  
15  
16  
17  
18

### 19 *Trial status*

20  
21 Recruitment of participants started in September 2019, and the last participant is expected to  
22  
23 reach the primary endpoint (6-month follow-up) in March 2020. Primary data analysis will  
24  
25 begin in April 2020. The dissemination phase of the trial results will commence in May 2020.  
26  
27  
28  
29

30  
31 (3963 words)  
32  
33  
34

35 **Author contributions:** RKJT and WLK wrote the first draft of the protocol. DL, AvT, AdT,  
36  
37 CT and SB developed the materials for the intervention condition and contributed to the  
38  
39 details of the intervention in the manuscript. MTC provided access to the standard of care  
40  
41 condition. RKJT, CSW, MLW and MIC obtained funding for the research. All authors  
42  
43 conceived the study and revised the manuscript for relevant scientific content in the final  
44  
45 version of the manuscript.  
46  
47  
48  
49  
50

51 **Funding statement:** This work was supported by Infectious Diseases Programme Research  
52  
53 Grant, Saw Swee Hock School of Public Health, National University of Singapore (SSHSPH  
54  
55 ID-PRG/SeedFund/2018/03). The funder had no role in study design, data collection and  
56  
57 analysis, decision to publish, or preparation of the manuscript.  
58  
59  
60

1  
2  
3  
4  
5  
6 **Competing interests:** None declared.  
7  
8  
9

10 **Patient consent:** Patient consent obtained.  
11  
12  
13

14 **Ethics approval:** Ethics approval for the protocol was obtained from the National University  
15 of Singapore Institutional Review Board (Reference Number S-19-059).  
16  
17  
18  
19

20  
21 **Data availability statement:** Results of this study will be published and disseminated in  
22 peer-reviewed journals, as detailed in the protocol above. Deidentified participant data and  
23 data dictionaries will not be publicly available due to restrictions by the ethics board over  
24 concerns of risk to participants. The datasets generated during and/or analysed for this study  
25 will be available from the corresponding author on reasonable request, following the  
26 completion of the study. Additional documents including the study protocol and statistical  
27 analysis plan will be publicly available through this manuscript and the trial registry,  
28 Clinicaltrials.gov (NCT04021953).  
29  
30  
31  
32  
33  
34  
35  
36  
37  
38  
39  
40  
41  
42  
43  
44  
45  
46  
47  
48  
49  
50  
51  
52  
53  
54  
55  
56  
57  
58  
59  
60

## References

1. UNAIDS. *Global HIV & AIDS statistics — 2019 fact sheet*. 2019 [cited 2019 July 24]; Available from: <https://www.unaids.org/en/resources/fact-sheet>.
2. Beyrer, C., et al., *Global epidemiology of HIV infection in men who have sex with men*. *Lancet* (London, England), 2012. **380**(9839): p. 367-377.
3. Beyrer, C., et al., *Global epidemiology of HIV infection in men who have sex with men*. *Lancet*, 2012. **380**(9839): p. 367-77.
4. Health, M.o. *Update on the HIV/AIDS Situation in Singapore 2018 (June 2019)*. 2019 [cited 2019 12 July]; Available from: [https://www.moh.gov.sg/resources-statistics/infectious-disease-statistics/hiv-stats/update-on-the-hiv-aids-situation-in-singapore-2018-\(june-2019\)](https://www.moh.gov.sg/resources-statistics/infectious-disease-statistics/hiv-stats/update-on-the-hiv-aids-situation-in-singapore-2018-(june-2019)).
5. Guadamuz, T.E., et al., *Young, Online and in the Dark: Scaling Up HIV Testing among MSM in ASEAN*. *PloS one*, 2015. **10**(5): p. e0126658-e0126658.
6. Scheim, A.I. and R. Travers, *Barriers and facilitators to HIV and sexually transmitted infections testing for gay, bisexual, and other transgender men who have sex with men*. *AIDS Care*, 2017. **29**(8): p. 990-995.
7. Pharr, J.R., N.L. Lough, and E.E. Ezeanolue, *Barriers to HIV Testing Among Young Men Who Have Sex With Men (MSM): Experiences from Clark County, Nevada*. *Global journal of health science*, 2015. **8**(7): p. 9-17.
8. Stephens, S.C., et al., *Dogs Are Talking: San Francisco's social marketing campaign to increase syphilis screening*. *Sex Transm Dis*, 2010. **37**(3): p. 173-6.
9. Plant, A., et al., *Stop the sores: the making and evaluation of a successful social marketing campaign*. *Health Promot Pract*, 2010. **11**(1): p. 23-33.
10. Plant, A., et al., *Check Yourself: a social marketing campaign to increase syphilis screening in Los Angeles County*. *Sex Transm Dis*, 2014. **41**(1): p. 50-7.

- 1  
2  
3 11. Pedrana, A., et al., *Stop the drama Downunder: a social marketing campaign*  
4  
5 *increases HIV/sexually transmitted infection knowledge and testing in Australian gay*  
6  
7 *men*. Sex Transm Dis, 2012. **39**(8): p. 651-8.  
8  
9
- 10 12. Ahrens, K., et al., *Healthy Penis: San Francisco's Social Marketing Campaign to*  
11  
12 *Increase Syphilis Testing among Gay and Bisexual Men*. PLOS Medicine, 2006.  
13  
14 **3**(12): p. e474.  
15  
16
- 17 13. Zou, H., et al., *A randomised controlled trial to evaluate the impact of sexual health*  
18  
19 *clinic based automated text message reminders on testing of HIV and other sexually*  
20  
21 *transmitted infections in men who have sex with men in China: protocol for the T2T*  
22  
23 *Study*. BMJ Open, 2017. **7**(7): p. e015787.  
24  
25
- 26 14. Zou, H., et al., *Automated, computer generated reminders and increased detection of*  
27  
28 *gonorrhoea, chlamydia and syphilis in men who have sex with men*. PLoS One, 2013.  
29  
30 **8**(4): p. e61972.  
31  
32
- 33 15. Bourne, C., et al., *Short message service reminder intervention doubles sexually*  
34  
35 *transmitted infection/HIV re-testing rates among men who have sex with men*. Sex  
36  
37 *Transm Infect*, 2011. **87**(3): p. 229-31.  
38  
39
- 40 16. Zou, H., et al., *Internet-Facilitated, Voluntary Counseling and Testing (VCT) Clinic-*  
41  
42 *Based HIV Testing among Men Who Have Sex with Men in China*. PLOS ONE, 2013.  
43  
44 **8**(2): p. e51919.  
45  
46
- 47 17. Wang, L., et al., *Using Social Media To Increase HIV Testing Among Men Who Have*  
48  
49 *Sex with Men — Beijing, China, 2013–2017*. Vol. 68. 2019. 478-482.  
50  
51
- 52 18. Tang, W., et al., *Crowdsourcing HIV Test Promotion Videos: A Noninferiority*  
53  
54 *Randomized Controlled Trial in China*. Clin Infect Dis, 2016. **62**(11): p. 1436-1442.  
55  
56  
57  
58  
59  
60



19. Lau, J.T., H.Y. Tsui, and M.M. Lau, *A pilot clustered randomized control trial evaluating the efficacy of a network-based HIV peer-education intervention targeting men who have sex with men in Hong Kong, China*. *AIDS Care*, 2013. **25**(7): p. 812-9.
20. Ko, N.-Y., et al., *Effects of Internet Popular Opinion Leaders (iPOL) Among Internet-Using Men Who Have Sex With Men*. *J Med Internet Res*, 2013. **15**(2): p. e40.
21. Klausner, J.D., D.K. Levine, and C.K. Kent, *Internet-based site-specific interventions for syphilis prevention among gay and bisexual men*. *AIDS Care*, 2004. **16**(8): p. 964-970.
22. Blas, M.M., et al., *Effect of an online video-based intervention to increase HIV testing in men who have sex with men in Peru*. *PloS one*, 2010. **5**(5): p. e10448-e10448.
23. Tang, W., et al., *Crowdsourcing to expand HIV testing among men who have sex with men in China: A closed cohort stepped wedge cluster randomized controlled trial*. *PLOS Medicine*, 2018. **15**(8): p. e1002645.
24. Mustanski, B.S., et al., *HIV in young men who have sex with men: a review of epidemiology, risk and protective factors, and interventions*. *Journal of sex research*, 2011. **48**(2-3): p. 218-253.
25. Ministry of Health Singapore. *Update on the HIV/AIDS situation in Singapore 2018 (June 2019)*. 2019 [cited 2019 July 3]; Available from: [https://www.moh.gov.sg/resources-statistics/infectious-disease-statistics/hiv-stats/update-on-the-hiv-aids-situation-in-singapore-2018-\(june-2019\)](https://www.moh.gov.sg/resources-statistics/infectious-disease-statistics/hiv-stats/update-on-the-hiv-aids-situation-in-singapore-2018-(june-2019)).
26. Mathews, M., et al., *Singapore perspectives 2014: differences*. 2015, Hackensack, N.J.;Singapore;: World Scientific Pub. Co.
27. Panchapakesan, C., L. Li, and S.S. Ho, *Examining How Communication and Demographic Factors Relate to Attitudes Toward Legalization of Same-Sex Marriage*

- 1  
2  
3 *in Singapore*. International Journal of Public Opinion Research, 2014. **26**(3): p. 355-  
4  
5 368.  
6  
7  
8 28. Detenber, B.H., et al., *Singaporeans' Attitudes toward Lesbians and Gay Men and*  
9  
10 *their Tolerance of Media Portrayals of Homosexuality*. International Journal of Public  
11  
12 Opinion Research, 2007. **19**(3): p. 367-379.  
13  
14  
15 29. Chua L. J., S.D., Tan R. K. J., Jie, K. W., *Decriminalisation of Same-sex Relations*  
16  
17 *and Social Attitudes: An Empirical Study of Singapore*. Hong Kong Law Journal,  
18  
19 2017. **47**(3): p. 793-824.  
20  
21  
22 30. Tan, R.K.J., et al., *Clinics as spaces of costly disclosure: HIV/STI testing and*  
23  
24 *anticipated stigma among gay, bisexual and queer men*. Culture, Health & Sexuality,  
25  
26 2019: p. 1-14.  
27  
28  
29 31. Tan, R.K.J., et al., *Extent and selectivity of sexual orientation disclosure and its*  
30  
31 *association with HIV and other STI testing patterns among gay, bisexual and other*  
32  
33 *men who have sex with men*. Sexually Transmitted Infections, 2019: p. sextrans-2018-  
34  
35 053866.  
36  
37  
38 32. Frost, D.M. and I.H. Meyer, *Measuring community connectedness among diverse*  
39  
40 *sexual minority populations*. Journal of sex research, 2012. **49**(1): p. 36-49.  
41  
42  
43 33. Schrimshaw, E.W., et al., *Disclosure and concealment of sexual orientation and the*  
44  
45 *mental health of non-gay-identified, behaviorally bisexual men*. Journal of consulting  
46  
47 and clinical psychology, 2013. **81**(1): p. 141-153.  
48  
49  
50 34. Smolenski, D.J., et al., *Sexual compulsivity and high-risk sex among Latino men: the*  
51  
52 *role of internalized homonegativity and gay organizations*. AIDS Care, 2009. **21**(1):  
53  
54 p. 42-9.  
55  
56  
57  
58  
59  
60

- 1  
2  
3 35. Frost, D.M. and I.H. Meyer, *Internalized Homophobia and Relationship Quality*  
4 *among Lesbians, Gay Men, and Bisexuals*. Journal of counseling psychology, 2009.  
5  
6  
7 **56**(1): p. 97-109.  
8  
9  
10 36. Jamil, M.S., et al., *HIV testing self-efficacy is associated with higher HIV testing*  
11 *frequency and perceived likelihood to self-test among gay and bisexual men %J*  
12 *Sexual Health*. 2017. **14**(2): p. 170-178.  
13  
14  
15 37. Pettifor, A., et al., *Factors Associated with HIV Testing Among Public Sector Clinic*  
16 *Attendees in Johannesburg, South Africa*. AIDS and Behavior, 2010. **14**(4): p. 913-  
17  
18 921.  
19  
20  
21 38. Tan, R.K.J., et al., *Cost and anonymity as factors for the effective implementation of*  
22 *pre-exposure prophylaxis: an observational study among gay, bisexual and other men*  
23 *who have sex with men in Singapore %J Sexual Health*. 2018: p. -.  
24  
25  
26 39. Schnall, R., et al., *eHealth Interventions for HIV Prevention in High-Risk Men Who*  
27 *Have Sex With Men: A Systematic Review*. J Med Internet Res, 2014. **16**(5): p. e134.  
28  
29  
30 40. Sussman, J.B. and R.A. Hayward, *An IV for the RCT: using instrumental variables to*  
31 *adjust for treatment contamination in randomised controlled trials*. BMJ (Clinical  
32  
33 research ed.), 2010. **340**: p. c2073-c2073.  
34  
35  
36  
37  
38  
39  
40  
41  
42  
43  
44  
45  
46  
47  
48  
49  
50  
51  
52  
53  
54  
55  
56  
57  
58  
59  
60

| Episode | Title              | Synopsis                                                                                                                                                                                                                                    |
|---------|--------------------|---------------------------------------------------------------------------------------------------------------------------------------------------------------------------------------------------------------------------------------------|
| 1       | Pretty in pink     | At Pink Dot, Rai meets Haniff, someone from the same army camp, while Isaac hooks up with someone at his party. Meanwhile, after celebrating their month-sary, Joel introduces his Mom to Ridzwan.                                          |
| 2       | Challenge accepted | As Rai heads out on a first date with Haniff, his Mom discovers a Pink Dot flyer. Joel asks Ridzwan to consider a challenging proposition. Meanwhile, Isaac is unable to concentrate at work and continues to experience pain while peeing. |
| 3       | Signs & omens      | Rai's Mom confronts him about Pink Dot. Isaac is sexually frustrated and receives some disturbing news. Ridzwan seeks out a friend from the past for help while Rai bumps into Haniff, who treats him coldly.                               |
| 4       | Booty call         | Rai's Mom and sister, Priya, discuss Rai's sexuality. Haniff surprisingly agrees to meet Rai again but reveals something that will change their relationship forever. Ridzwan accepts Joel's proposition but will it bring them closer?     |
| 5       | Jeremy from work   | Joel pays Ridzwan a surprise visit and meets Ridzwan's Mom. Rai meets Isaac for advice about Haniff. Back home, Rai's Mom attempts to reconnect with Rai.                                                                                   |
| 6       | A love like ours   | Rai and Haniff book out of army camp together; their desires palpable, and Isaac's party friends desert him. Meanwhile, Joel's frustration with Ridzwan's secrecy reaches a breaking point.                                                 |

**Table 1. List of episodes and synopses of the People Like Us web drama series season two**

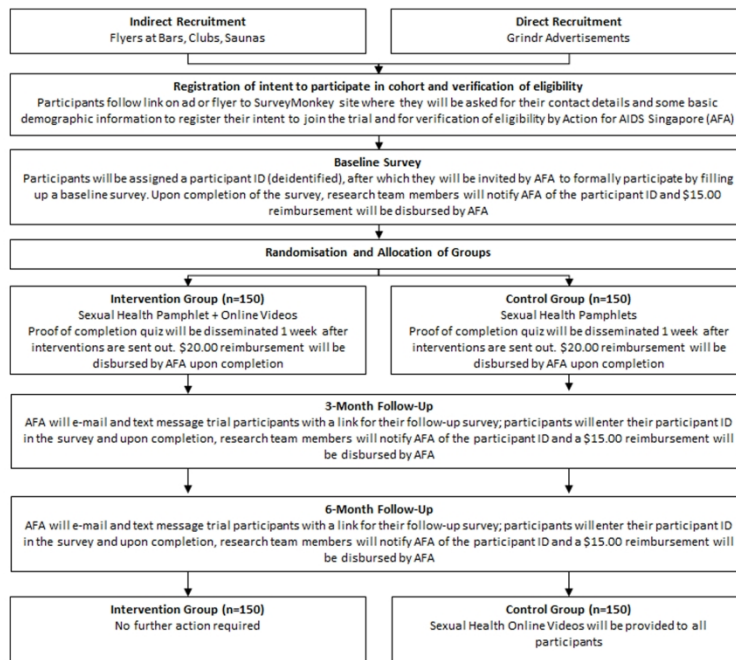

Flowchart for study procedures and randomisation

209x297mm (300 x 300 DPI)

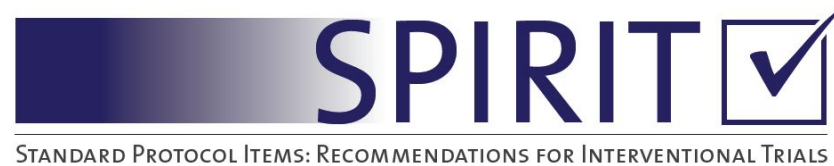

SPIRIT 2013 Checklist: Recommended items to address in a clinical trial protocol and related documents\*

| Section/item                      | Item No | Description                                                                                                                                                                                                                                                                              | Addressed on page number |
|-----------------------------------|---------|------------------------------------------------------------------------------------------------------------------------------------------------------------------------------------------------------------------------------------------------------------------------------------------|--------------------------|
| <b>Administrative information</b> |         |                                                                                                                                                                                                                                                                                          |                          |
| Title                             | 1       | Descriptive title identifying the study design, population, interventions, and, if applicable, trial acronym                                                                                                                                                                             | 1                        |
| Trial registration                | 2a      | Trial identifier and registry name. If not yet registered, name of intended registry                                                                                                                                                                                                     | 3                        |
|                                   | 2b      | All items from the World Health Organization Trial Registration Data Set                                                                                                                                                                                                                 | N.A.                     |
| Protocol version                  | 3       | Date and version identifier                                                                                                                                                                                                                                                              | N.A.                     |
| Funding                           | 4       | Sources and types of financial, material, and other support                                                                                                                                                                                                                              | 17                       |
| Roles and responsibilities        | 5a      | Names, affiliations, and roles of protocol contributors                                                                                                                                                                                                                                  | 1, 17                    |
|                                   | 5b      | Name and contact information for the trial sponsor                                                                                                                                                                                                                                       | N.A.                     |
|                                   | 5c      | Role of study sponsor and funders, if any, in study design; collection, management, analysis, and interpretation of data; writing of the report; and the decision to submit the report for publication, including whether they will have ultimate authority over any of these activities | 17                       |
|                                   | 5d      | Composition, roles, and responsibilities of the coordinating centre, steering committee, endpoint adjudication committee, data management team, and other individuals or groups overseeing the trial, if applicable (see Item 21a for data monitoring committee)                         | N.A.                     |

|    |                                                           |     |                                                                                                                                                                                                                                                                                                                                                                                |          |  |  |  |
|----|-----------------------------------------------------------|-----|--------------------------------------------------------------------------------------------------------------------------------------------------------------------------------------------------------------------------------------------------------------------------------------------------------------------------------------------------------------------------------|----------|--|--|--|
| 1  | <b>Introduction</b>                                       |     |                                                                                                                                                                                                                                                                                                                                                                                |          |  |  |  |
| 2  |                                                           |     |                                                                                                                                                                                                                                                                                                                                                                                |          |  |  |  |
| 3  | Background and rationale                                  | 6a  | Description of research question and justification for undertaking the trial, including summary of relevant studies (published and unpublished) examining benefits and harms for each intervention                                                                                                                                                                             | 4-6      |  |  |  |
| 4  |                                                           |     |                                                                                                                                                                                                                                                                                                                                                                                |          |  |  |  |
| 5  |                                                           |     |                                                                                                                                                                                                                                                                                                                                                                                |          |  |  |  |
| 6  |                                                           | 6b  | Explanation for choice of comparators                                                                                                                                                                                                                                                                                                                                          | 5-6      |  |  |  |
| 7  |                                                           |     |                                                                                                                                                                                                                                                                                                                                                                                |          |  |  |  |
| 8  | Objectives                                                | 7   | Specific objectives or hypotheses                                                                                                                                                                                                                                                                                                                                              | 7        |  |  |  |
| 9  |                                                           |     |                                                                                                                                                                                                                                                                                                                                                                                |          |  |  |  |
| 10 | Trial design                                              | 8   | Description of trial design including type of trial (eg, parallel group, crossover, factorial, single group), allocation ratio, and framework (eg, superiority, equivalence, noninferiority, exploratory)                                                                                                                                                                      | 7        |  |  |  |
| 11 |                                                           |     |                                                                                                                                                                                                                                                                                                                                                                                |          |  |  |  |
| 12 |                                                           |     |                                                                                                                                                                                                                                                                                                                                                                                |          |  |  |  |
| 13 |                                                           |     |                                                                                                                                                                                                                                                                                                                                                                                |          |  |  |  |
| 14 | <b>Methods: Participants, interventions, and outcomes</b> |     |                                                                                                                                                                                                                                                                                                                                                                                |          |  |  |  |
| 15 |                                                           |     |                                                                                                                                                                                                                                                                                                                                                                                |          |  |  |  |
| 16 | Study setting                                             | 9   | Description of study settings (eg, community clinic, academic hospital) and list of countries where data will be collected. Reference to where list of study sites can be obtained                                                                                                                                                                                             | 7-8      |  |  |  |
| 17 |                                                           |     |                                                                                                                                                                                                                                                                                                                                                                                |          |  |  |  |
| 18 |                                                           |     |                                                                                                                                                                                                                                                                                                                                                                                |          |  |  |  |
| 19 | Eligibility criteria                                      | 10  | Inclusion and exclusion criteria for participants. If applicable, eligibility criteria for study centres and individuals who will perform the interventions (eg, surgeons, psychotherapists)                                                                                                                                                                                   | 8        |  |  |  |
| 20 |                                                           |     |                                                                                                                                                                                                                                                                                                                                                                                |          |  |  |  |
| 21 |                                                           |     |                                                                                                                                                                                                                                                                                                                                                                                |          |  |  |  |
| 22 | Interventions                                             | 11a | Interventions for each group with sufficient detail to allow replication, including how and when they will be administered                                                                                                                                                                                                                                                     | 11-12    |  |  |  |
| 23 |                                                           |     |                                                                                                                                                                                                                                                                                                                                                                                |          |  |  |  |
| 24 |                                                           |     |                                                                                                                                                                                                                                                                                                                                                                                |          |  |  |  |
| 25 |                                                           |     |                                                                                                                                                                                                                                                                                                                                                                                |          |  |  |  |
| 26 |                                                           | 11b | Criteria for discontinuing or modifying allocated interventions for a given trial participant (eg, drug dose change in response to harms, participant request, or improving/worsening disease)                                                                                                                                                                                 | N.A.     |  |  |  |
| 27 |                                                           |     |                                                                                                                                                                                                                                                                                                                                                                                |          |  |  |  |
| 28 |                                                           |     |                                                                                                                                                                                                                                                                                                                                                                                |          |  |  |  |
| 29 |                                                           | 11c | Strategies to improve adherence to intervention protocols, and any procedures for monitoring adherence (eg, drug tablet return, laboratory tests)                                                                                                                                                                                                                              | N.A.     |  |  |  |
| 30 |                                                           |     |                                                                                                                                                                                                                                                                                                                                                                                |          |  |  |  |
| 31 |                                                           |     |                                                                                                                                                                                                                                                                                                                                                                                |          |  |  |  |
| 32 |                                                           | 11d | Relevant concomitant care and interventions that are permitted or prohibited during the trial                                                                                                                                                                                                                                                                                  | N.A.     |  |  |  |
| 33 |                                                           |     |                                                                                                                                                                                                                                                                                                                                                                                |          |  |  |  |
| 34 | Outcomes                                                  | 12  | Primary, secondary, and other outcomes, including the specific measurement variable (eg, systolic blood pressure), analysis metric (eg, change from baseline, final value, time to event), method of aggregation (eg, median, proportion), and time point for each outcome. Explanation of the clinical relevance of chosen efficacy and harm outcomes is strongly recommended | 12-13    |  |  |  |
| 35 |                                                           |     |                                                                                                                                                                                                                                                                                                                                                                                |          |  |  |  |
| 36 |                                                           |     |                                                                                                                                                                                                                                                                                                                                                                                |          |  |  |  |
| 37 |                                                           |     |                                                                                                                                                                                                                                                                                                                                                                                |          |  |  |  |
| 38 |                                                           |     |                                                                                                                                                                                                                                                                                                                                                                                |          |  |  |  |
| 39 | Participant timeline                                      | 13  | Time schedule of enrolment, interventions (including any run-ins and washouts), assessments, and visits for participants. A schematic diagram is highly recommended (see Figure)                                                                                                                                                                                               | 9-11, 22 |  |  |  |
| 40 |                                                           |     |                                                                                                                                                                                                                                                                                                                                                                                |          |  |  |  |
| 41 |                                                           |     |                                                                                                                                                                                                                                                                                                                                                                                |          |  |  |  |
| 42 |                                                           |     |                                                                                                                                                                                                                                                                                                                                                                                |          |  |  |  |
| 43 |                                                           |     |                                                                                                                                                                                                                                                                                                                                                                                |          |  |  |  |
| 44 |                                                           |     |                                                                                                                                                                                                                                                                                                                                                                                |          |  |  |  |
| 45 |                                                           |     |                                                                                                                                                                                                                                                                                                                                                                                |          |  |  |  |
| 46 |                                                           |     |                                                                                                                                                                                                                                                                                                                                                                                |          |  |  |  |

|   |             |    |                                                                                                                                                                                       |       |
|---|-------------|----|---------------------------------------------------------------------------------------------------------------------------------------------------------------------------------------|-------|
| 1 | Sample size | 14 | Estimated number of participants needed to achieve study objectives and how it was determined, including clinical and statistical assumptions supporting any sample size calculations | 13-14 |
| 2 |             |    |                                                                                                                                                                                       |       |
| 3 |             |    |                                                                                                                                                                                       |       |
| 4 | Recruitment | 15 | Strategies for achieving adequate participant enrolment to reach target sample size                                                                                                   | 9, 16 |
| 5 |             |    |                                                                                                                                                                                       |       |

### 6 **Methods: Assignment of interventions (for controlled trials)**

#### 7 Allocation:

|    |                    |     |                                                                                                                                                                                                                                                                                                                                                          |      |
|----|--------------------|-----|----------------------------------------------------------------------------------------------------------------------------------------------------------------------------------------------------------------------------------------------------------------------------------------------------------------------------------------------------------|------|
| 8  |                    |     |                                                                                                                                                                                                                                                                                                                                                          |      |
| 9  |                    |     |                                                                                                                                                                                                                                                                                                                                                          |      |
| 10 | Sequence           | 16a | Method of generating the allocation sequence (eg, computer-generated random numbers), and list of any factors for stratification. To reduce predictability of a random sequence, details of any planned restriction (eg, blocking) should be provided in a separate document that is unavailable to those who enrol participants or assign interventions | 9-10 |
| 11 | generation         |     |                                                                                                                                                                                                                                                                                                                                                          |      |
| 12 |                    |     |                                                                                                                                                                                                                                                                                                                                                          |      |
| 13 |                    |     |                                                                                                                                                                                                                                                                                                                                                          |      |
| 14 |                    |     |                                                                                                                                                                                                                                                                                                                                                          |      |
| 15 |                    |     |                                                                                                                                                                                                                                                                                                                                                          |      |
| 16 | Allocation         | 16b | Mechanism of implementing the allocation sequence (eg, central telephone; sequentially numbered, opaque, sealed envelopes), describing any steps to conceal the sequence until interventions are assigned                                                                                                                                                | 9-10 |
| 17 | concealment        |     |                                                                                                                                                                                                                                                                                                                                                          |      |
| 18 | mechanism          |     |                                                                                                                                                                                                                                                                                                                                                          |      |
| 19 |                    |     |                                                                                                                                                                                                                                                                                                                                                          |      |
| 20 | Implementation     | 16c | Who will generate the allocation sequence, who will enrol participants, and who will assign participants to interventions                                                                                                                                                                                                                                | 9-10 |
| 21 |                    |     |                                                                                                                                                                                                                                                                                                                                                          |      |
| 22 |                    |     |                                                                                                                                                                                                                                                                                                                                                          |      |
| 23 |                    |     |                                                                                                                                                                                                                                                                                                                                                          |      |
| 24 | Blinding (masking) | 17a | Who will be blinded after assignment to interventions (eg, trial participants, care providers, outcome assessors, data analysts), and how                                                                                                                                                                                                                | 10   |
| 25 |                    |     |                                                                                                                                                                                                                                                                                                                                                          |      |
| 26 |                    |     |                                                                                                                                                                                                                                                                                                                                                          |      |
| 27 |                    | 17b | If blinded, circumstances under which unblinding is permissible, and procedure for revealing a participant's allocated intervention during the trial                                                                                                                                                                                                     | N.A. |
| 28 |                    |     |                                                                                                                                                                                                                                                                                                                                                          |      |
| 29 |                    |     |                                                                                                                                                                                                                                                                                                                                                          |      |
| 30 |                    |     |                                                                                                                                                                                                                                                                                                                                                          |      |

### 31 **Methods: Data collection, management, and analysis**

|    |                 |     |                                                                                                                                                                                                                                                                                                                                                                                                              |       |
|----|-----------------|-----|--------------------------------------------------------------------------------------------------------------------------------------------------------------------------------------------------------------------------------------------------------------------------------------------------------------------------------------------------------------------------------------------------------------|-------|
| 32 |                 |     |                                                                                                                                                                                                                                                                                                                                                                                                              |       |
| 33 | Data collection | 18a | Plans for assessment and collection of outcome, baseline, and other trial data, including any related processes to promote data quality (eg, duplicate measurements, training of assessors) and a description of study instruments (eg, questionnaires, laboratory tests) along with their reliability and validity, if known. Reference to where data collection forms can be found, if not in the protocol | 10-11 |
| 34 | methods         |     |                                                                                                                                                                                                                                                                                                                                                                                                              |       |
| 35 |                 |     |                                                                                                                                                                                                                                                                                                                                                                                                              |       |
| 36 |                 |     |                                                                                                                                                                                                                                                                                                                                                                                                              |       |
| 37 |                 |     |                                                                                                                                                                                                                                                                                                                                                                                                              |       |
| 38 |                 | 18b | Plans to promote participant retention and complete follow-up, including list of any outcome data to be collected for participants who discontinue or deviate from intervention protocols                                                                                                                                                                                                                    | 15-16 |
| 39 |                 |     |                                                                                                                                                                                                                                                                                                                                                                                                              |       |
| 40 |                 |     |                                                                                                                                                                                                                                                                                                                                                                                                              |       |
| 41 |                 |     |                                                                                                                                                                                                                                                                                                                                                                                                              |       |
| 42 |                 |     |                                                                                                                                                                                                                                                                                                                                                                                                              |       |



|    |                                 |     |                                                                                                                                                                                                                                                                                                                                       |       |
|----|---------------------------------|-----|---------------------------------------------------------------------------------------------------------------------------------------------------------------------------------------------------------------------------------------------------------------------------------------------------------------------------------------|-------|
| 1  | Data management                 | 19  | Plans for data entry, coding, security, and storage, including any related processes to promote data quality (eg, double data entry; range checks for data values). Reference to where details of data management procedures can be found, if not in the protocol                                                                     | N.A.  |
| 2  |                                 |     |                                                                                                                                                                                                                                                                                                                                       |       |
| 3  |                                 |     |                                                                                                                                                                                                                                                                                                                                       |       |
| 4  |                                 |     |                                                                                                                                                                                                                                                                                                                                       |       |
| 5  | Statistical methods             | 20a | Statistical methods for analysing primary and secondary outcomes. Reference to where other details of the statistical analysis plan can be found, if not in the protocol                                                                                                                                                              | 14    |
| 6  |                                 |     |                                                                                                                                                                                                                                                                                                                                       |       |
| 7  |                                 |     |                                                                                                                                                                                                                                                                                                                                       |       |
| 8  |                                 | 20b | Methods for any additional analyses (eg, subgroup and adjusted analyses)                                                                                                                                                                                                                                                              | 14-16 |
| 9  |                                 |     |                                                                                                                                                                                                                                                                                                                                       |       |
| 10 |                                 | 20c | Definition of analysis population relating to protocol non-adherence (eg, as randomised analysis), and any statistical methods to handle missing data (eg, multiple imputation)                                                                                                                                                       | 14-16 |
| 11 |                                 |     |                                                                                                                                                                                                                                                                                                                                       |       |
| 12 |                                 |     |                                                                                                                                                                                                                                                                                                                                       |       |
| 13 |                                 |     |                                                                                                                                                                                                                                                                                                                                       |       |
| 14 | <b>Methods: Monitoring</b>      |     |                                                                                                                                                                                                                                                                                                                                       |       |
| 15 |                                 |     |                                                                                                                                                                                                                                                                                                                                       |       |
| 16 | Data monitoring                 | 21a | Composition of data monitoring committee (DMC); summary of its role and reporting structure; statement of whether it is independent from the sponsor and competing interests; and reference to where further details about its charter can be found, if not in the protocol. Alternatively, an explanation of why a DMC is not needed | 18    |
| 17 |                                 |     |                                                                                                                                                                                                                                                                                                                                       |       |
| 18 |                                 |     |                                                                                                                                                                                                                                                                                                                                       |       |
| 19 |                                 |     |                                                                                                                                                                                                                                                                                                                                       |       |
| 20 |                                 |     |                                                                                                                                                                                                                                                                                                                                       |       |
| 21 |                                 |     |                                                                                                                                                                                                                                                                                                                                       |       |
| 22 |                                 | 21b | Description of any interim analyses and stopping guidelines, including who will have access to these interim results and make the final decision to terminate the trial                                                                                                                                                               | N.A.  |
| 23 |                                 |     |                                                                                                                                                                                                                                                                                                                                       |       |
| 24 |                                 |     |                                                                                                                                                                                                                                                                                                                                       |       |
| 25 | Harms                           | 22  | Plans for collecting, assessing, reporting, and managing solicited and spontaneously reported adverse events and other unintended effects of trial interventions or trial conduct                                                                                                                                                     | N.A.  |
| 26 |                                 |     |                                                                                                                                                                                                                                                                                                                                       |       |
| 27 |                                 |     |                                                                                                                                                                                                                                                                                                                                       |       |
| 28 | Auditing                        | 23  | Frequency and procedures for auditing trial conduct, if any, and whether the process will be independent from investigators and the sponsor                                                                                                                                                                                           | N.A.  |
| 29 |                                 |     |                                                                                                                                                                                                                                                                                                                                       |       |
| 30 |                                 |     |                                                                                                                                                                                                                                                                                                                                       |       |
| 31 |                                 |     |                                                                                                                                                                                                                                                                                                                                       |       |
| 32 | <b>Ethics and dissemination</b> |     |                                                                                                                                                                                                                                                                                                                                       |       |
| 33 |                                 |     |                                                                                                                                                                                                                                                                                                                                       |       |
| 34 | Research ethics approval        | 24  | Plans for seeking research ethics committee/institutional review board (REC/IRB) approval                                                                                                                                                                                                                                             | N.A.  |
| 35 |                                 |     |                                                                                                                                                                                                                                                                                                                                       |       |
| 36 |                                 |     |                                                                                                                                                                                                                                                                                                                                       |       |
| 37 | Protocol amendments             | 25  | Plans for communicating important protocol modifications (eg, changes to eligibility criteria, outcomes, analyses) to relevant parties (eg, investigators, REC/IRBs, trial participants, trial registries, journals, regulators)                                                                                                      | 16-17 |
| 38 |                                 |     |                                                                                                                                                                                                                                                                                                                                       |       |
| 39 |                                 |     |                                                                                                                                                                                                                                                                                                                                       |       |
| 40 |                                 |     |                                                                                                                                                                                                                                                                                                                                       |       |
| 41 |                                 |     |                                                                                                                                                                                                                                                                                                                                       |       |
| 42 |                                 |     |                                                                                                                                                                                                                                                                                                                                       |       |
| 43 |                                 |     |                                                                                                                                                                                                                                                                                                                                       |       |
| 44 |                                 |     |                                                                                                                                                                                                                                                                                                                                       |       |
| 45 |                                 |     |                                                                                                                                                                                                                                                                                                                                       |       |
| 46 |                                 |     |                                                                                                                                                                                                                                                                                                                                       |       |

|    |                               |     |                                                                                                                                                                                                                                                                                     |       |
|----|-------------------------------|-----|-------------------------------------------------------------------------------------------------------------------------------------------------------------------------------------------------------------------------------------------------------------------------------------|-------|
| 1  | Consent or assent             | 26a | Who will obtain informed consent or assent from potential trial participants or authorised surrogates, and how (see Item 32)                                                                                                                                                        | 9, 16 |
| 2  |                               |     |                                                                                                                                                                                                                                                                                     |       |
| 3  |                               |     |                                                                                                                                                                                                                                                                                     |       |
| 4  |                               | 26b | Additional consent provisions for collection and use of participant data and biological specimens in ancillary studies, if applicable                                                                                                                                               | N.A.  |
| 5  |                               |     |                                                                                                                                                                                                                                                                                     |       |
| 6  |                               |     |                                                                                                                                                                                                                                                                                     |       |
| 7  | Confidentiality               | 27  | How personal information about potential and enrolled participants will be collected, shared, and maintained in order to protect confidentiality before, during, and after the trial                                                                                                | 16    |
| 8  |                               |     |                                                                                                                                                                                                                                                                                     |       |
| 9  |                               |     |                                                                                                                                                                                                                                                                                     |       |
| 10 | Declaration of interests      | 28  | Financial and other competing interests for principal investigators for the overall trial and each study site                                                                                                                                                                       | 18    |
| 11 |                               |     |                                                                                                                                                                                                                                                                                     |       |
| 12 |                               |     |                                                                                                                                                                                                                                                                                     |       |
| 13 | Access to data                | 29  | Statement of who will have access to the final trial dataset, and disclosure of contractual agreements that limit such access for investigators                                                                                                                                     | N.A.  |
| 14 |                               |     |                                                                                                                                                                                                                                                                                     |       |
| 15 |                               |     |                                                                                                                                                                                                                                                                                     |       |
| 16 | Ancillary and post-trial care | 30  | Provisions, if any, for ancillary and post-trial care, and for compensation to those who suffer harm from trial participation                                                                                                                                                       | N.A.  |
| 17 |                               |     |                                                                                                                                                                                                                                                                                     |       |
| 18 |                               |     |                                                                                                                                                                                                                                                                                     |       |
| 19 |                               |     |                                                                                                                                                                                                                                                                                     |       |
| 20 | Dissemination policy          | 31a | Plans for investigators and sponsor to communicate trial results to participants, healthcare professionals, the public, and other relevant groups (eg, via publication, reporting in results databases, or other data sharing arrangements), including any publication restrictions | 16-17 |
| 21 |                               |     |                                                                                                                                                                                                                                                                                     |       |
| 22 |                               |     |                                                                                                                                                                                                                                                                                     |       |
| 23 |                               |     |                                                                                                                                                                                                                                                                                     |       |
| 24 |                               | 31b | Authorship eligibility guidelines and any intended use of professional writers                                                                                                                                                                                                      | N.A.  |
| 25 |                               |     |                                                                                                                                                                                                                                                                                     |       |
| 26 |                               | 31c | Plans, if any, for granting public access to the full protocol, participant-level dataset, and statistical code                                                                                                                                                                     | 16-17 |
| 27 |                               |     |                                                                                                                                                                                                                                                                                     |       |
| 28 |                               |     |                                                                                                                                                                                                                                                                                     |       |
| 29 | <b>Appendices</b>             |     |                                                                                                                                                                                                                                                                                     |       |
| 30 |                               |     |                                                                                                                                                                                                                                                                                     |       |
| 31 | Informed consent materials    | 32  | Model consent form and other related documentation given to participants and authorised surrogates                                                                                                                                                                                  | N.A.  |
| 32 |                               |     |                                                                                                                                                                                                                                                                                     |       |
| 33 |                               |     |                                                                                                                                                                                                                                                                                     |       |
| 34 | Biological specimens          | 33  | Plans for collection, laboratory evaluation, and storage of biological specimens for genetic or molecular analysis in the current trial and for future use in ancillary studies, if applicable                                                                                      | N.A.  |
| 35 |                               |     |                                                                                                                                                                                                                                                                                     |       |
| 36 |                               |     |                                                                                                                                                                                                                                                                                     |       |

\*It is strongly recommended that this checklist be read in conjunction with the SPIRIT 2013 Explanation & Elaboration for important clarification on the items. Amendments to the protocol should be tracked and dated. The SPIRIT checklist is copyrighted by the SPIRIT Group under the Creative Commons [“Attribution-NonCommercial-NoDerivs 3.0 Unported”](https://creativecommons.org/licenses/by-nc-nd/3.0/) license.

# BMJ Open

**Effect of a web drama video series on HIV and other sexually transmitted infection testing among gay, bisexual and queer men: study protocol for a community-based, pragmatic, randomised controlled trial in Singapore – the People Like Us (PLU) Evaluation Study**

|                                 |                                                                                                                                                                                                                                                                                                                                                                                                                                                                                                                                                                                                                                                                                                                                                                                                                                            |
|---------------------------------|--------------------------------------------------------------------------------------------------------------------------------------------------------------------------------------------------------------------------------------------------------------------------------------------------------------------------------------------------------------------------------------------------------------------------------------------------------------------------------------------------------------------------------------------------------------------------------------------------------------------------------------------------------------------------------------------------------------------------------------------------------------------------------------------------------------------------------------------|
| Journal:                        | <i>BMJ Open</i>                                                                                                                                                                                                                                                                                                                                                                                                                                                                                                                                                                                                                                                                                                                                                                                                                            |
| Manuscript ID                   | bmjopen-2019-033855.R1                                                                                                                                                                                                                                                                                                                                                                                                                                                                                                                                                                                                                                                                                                                                                                                                                     |
| Article Type:                   | Protocol                                                                                                                                                                                                                                                                                                                                                                                                                                                                                                                                                                                                                                                                                                                                                                                                                                   |
| Date Submitted by the Author:   | 13-Jan-2020                                                                                                                                                                                                                                                                                                                                                                                                                                                                                                                                                                                                                                                                                                                                                                                                                                |
| Complete List of Authors:       | Tan, Rayner Kay Jin; National University Singapore Saw Swee Hock School of Public Health,<br>Koh, Wee Ling; National University Singapore Saw Swee Hock School of Public Health<br>Le, Daniel; Action for AIDS Singapore<br>Tan, Avin; Action for AIDS Singapore<br>Tyler, Adrian; Action for AIDS Singapore<br>Tan, Calvin; Action for AIDS Singapore<br>Banerjee, Sumita; Action for AIDS Singapore<br>Wong, Chen Seong; National Centre for Infectious Diseases; National University Singapore Yong Loo Lin School of Medicine<br>Wong, Mee-Lian; National University Singapore Saw Swee Hock School of Public Health<br>Chio, Martin; National Skin Centre, Department of STI Control (DSC) Clinic<br>Chen, Mark I-Cheng; National University Singapore Saw Swee Hock School of Public Health; National Centre for Infectious Diseases |
| <b>Primary Subject Heading</b>: | Sexual health                                                                                                                                                                                                                                                                                                                                                                                                                                                                                                                                                                                                                                                                                                                                                                                                                              |
| Secondary Subject Heading:      | Diagnostics, HIV/AIDS, Infectious diseases, Public health                                                                                                                                                                                                                                                                                                                                                                                                                                                                                                                                                                                                                                                                                                                                                                                  |
| Keywords:                       | HIV & AIDS < INFECTIOUS DISEASES, INFECTIOUS DISEASES, Epidemiology < INFECTIOUS DISEASES, Public health < INFECTIOUS DISEASES, SOCIAL MEDICINE                                                                                                                                                                                                                                                                                                                                                                                                                                                                                                                                                                                                                                                                                            |
|                                 |                                                                                                                                                                                                                                                                                                                                                                                                                                                                                                                                                                                                                                                                                                                                                                                                                                            |

SCHOLARONE™  
Manuscripts

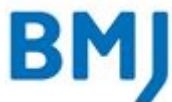

I, the Submitting Author has the right to grant and does grant on behalf of all authors of the Work (as defined in the below author licence), an exclusive licence and/or a non-exclusive licence for contributions from authors who are: i) UK Crown employees; ii) where BMJ has agreed a CC-BY licence shall apply, and/or iii) in accordance with the terms applicable for US Federal Government officers or employees acting as part of their official duties; on a worldwide, perpetual, irrevocable, royalty-free basis to BMJ Publishing Group Ltd ("BMJ") its licensees and where the relevant Journal is co-owned by BMJ to the co-owners of the Journal, to publish the Work in this journal and any other BMJ products and to exploit all rights, as set out in our [licence](#).

The Submitting Author accepts and understands that any supply made under these terms is made by BMJ to the Submitting Author unless you are acting as an employee on behalf of your employer or a postgraduate student of an affiliated institution which is paying any applicable article publishing charge ("APC") for Open Access articles. Where the Submitting Author wishes to make the Work available on an Open Access basis (and intends to pay the relevant APC), the terms of reuse of such Open Access shall be governed by a Creative Commons licence – details of these licences and which [Creative Commons](#) licence will apply to this Work are set out in our licence referred to above.

Other than as permitted in any relevant BMJ Author's Self Archiving Policies, I confirm this Work has not been accepted for publication elsewhere, is not being considered for publication elsewhere and does not duplicate material already published. I confirm all authors consent to publication of this Work and authorise the granting of this licence.

1  
2  
3 **Effect of a web drama video series on HIV and other sexually transmitted infection**  
4 **testing among gay, bisexual and queer men: study protocol for a community-based,**  
5 **pragmatic, randomised controlled trial in Singapore – the People Like Us (PLU)**  
6  
7  
8  
9

10 **Evaluation Study**  
11  
12  
13

14  
15 **Authors:**  
16

17 Rayner Kay Jin Tan<sup>1</sup>, Wee Ling Koh<sup>1</sup>, Daniel Le<sup>2,†</sup>, Avin Tan<sup>2</sup>, Adrian Tyler<sup>2</sup>, Calvin Tan<sup>2</sup>,

18  
19  
20 Sumita Banerjee<sup>2</sup>, Chen Seong Wong<sup>3,4</sup>, Wong Mee Lian<sup>1</sup>, Martin Tze-Wei Chio<sup>5</sup>, Mark I-  
21  
22 Cheng Chen<sup>1,4</sup>  
23  
24  
25  
26

27 <sup>1</sup>Saw Swee Hock School of Public Health, National University of Singapore, Singapore  
28

29 <sup>2</sup>Action for AIDS Singapore, Singapore  
30

31 <sup>3</sup>Yong Loo Lin School of Medicine, National University of Singapore, Singapore  
32

33 <sup>4</sup>National Centre for Infectious Diseases, Singapore  
34

35 <sup>5</sup>Department of STI Control (DSC) Clinic, National Skin Centre, Singapore  
36  
37  
38  
39  
40

41 † Co-author's current affiliation is at the National University Hospital, National University  
42  
43  
44 Health System, Singapore  
45  
46  
47  
48

49 **Corresponding author:**  
50

51 Name: Mr Rayner Kay Jin Tan  
52

53 Address: Saw Swee Hock School of Public Health, Tahir Foundation Building, National  
54  
55 University of Singapore, 12 Science Drive 2, #10-01, Singapore 117549  
56  
57

58 Telephone number: (65) 9187 8576  
59  
60

1  
2  
3  
4  
5  
6  
7  
8  
9  
10  
11  
12  
13  
14  
15  
16  
17  
18  
19  
20  
21  
22  
23  
24  
25  
26  
27  
28  
29  
30  
31  
32  
33  
34  
35  
36  
37  
38  
39  
40  
41  
42  
43  
44  
45  
46  
47  
48  
49  
50  
51  
52  
53  
54  
55  
56  
57  
58  
59  
60

Email: rayner.tan@u.nus.edu

For peer review only

1  
2  
3 **Effect of a web drama video series on HIV and other sexually transmitted infection**  
4 **testing among gay, bisexual and queer men: study protocol for a community-based,**  
5 **pragmatic, randomised controlled trial in Singapore– the People Like Us (PLU)**  
6  
7  
8  
9

10 **Evaluation Study**  
11  
12  
13  
14

15 **Abstract**  
16

17 **Introduction:** Gay, bisexual and queer (GBQ) men are at disproportionately higher risk of  
18 acquiring HIV and other sexually transmitted infections. While HIV/STI testing rates among  
19 GBQ men are increasing worldwide, they remain suboptimal in a variety of settings.  
20  
21  
22

23 **Methods and analysis:** The study is a pragmatic, randomised controlled trial design to  
24 evaluate an online video series developed by a community-based organisation in Singapore  
25 for GBQ men. A total of 300 HIV-negative, GBQ men in Singapore aged 18 to 29 years old  
26 will be recruited for this study. Participants will subsequently be randomised into the  
27 intervention arm (n=150) and the control arm (n=150). The intervention arm (n=150) will be  
28 assigned the intervention along with sexual health information via a pamphlet, while the  
29 control group (n=150) will be assigned only the sexual health information via a pamphlet.  
30  
31 Participants should also not have watched the video prior to their participation in this study,  
32 which will be ascertained through a questionnaire. Primary outcomes for this evaluation are  
33 changes in self-reported intention to test for, actual testing for, and regularity of testing for  
34 HIV, Syphilis, Chlamydia and Gonorrhoea at the 3-month and 6-month post-intervention.  
35  
36 Secondary outcomes include changes in self-reported risk perception for HIV and other  
37 sexually transmitted infections, knowledge of HIV, knowledge of risks associated with  
38 acquiring sexually transmitted infections, knowledge of HIV pre-exposure prophylaxis,  
39  
40 consistent condom use for anal sex with casual partners, incidence of sexually transmitted  
41 infections, connectedness to the lesbian, gay, bisexual and transgender (LGBT) community,  
42  
43  
44  
45  
46  
47  
48  
49  
50  
51  
52  
53  
54  
55  
56  
57  
58  
59  
60

1  
2  
3 self-concealment of sexual orientation, perceived homophobia, internalised homophobia,  
4  
5 HIV testing self-efficacy and HIV testing social norms.  
6

7  
8 **Ethics and dissemination:** The study has been approved by the National University of  
9  
10 Singapore Institutional Review Board (S-19-059) and registered at Clinicaltrials.gov  
11  
12 (NCT04021953). The results will be published in peer-reviewed academic journals and  
13  
14 disseminated to community-based organisations and policymakers.  
15  
16

17  
18  
19 **Trial registration:** Clinicaltrials.gov, NCT04021953  
20  
21

## 22 23 24 **Article summary**

### 25 26 *Strengths and limitations of this study*

- 27  
28 • The first randomised controlled trial to evaluate the efficacy of a popular web-based  
29  
30 drama series on HIV/STI testing for young gay, bisexual and queer men in Singapore
- 31  
32 • A collaboration with a community-based organisation in Singapore with strong public  
33  
34 health translation potential
- 35  
36 • Only self-reported data on HIV and other STI diagnoses are collected which cannot be  
37  
38 validated through laboratory-confirmed tests
- 39  
40 • While steps have been taken to mitigate contamination, the risks nonetheless exist as the  
41  
42 intervention material is available to the public
- 43  
44 • Sex between men is criminalised in Singapore which may impact participation among  
45  
46 sub-populations of the target population
- 47  
48  
49  
50  
51  
52  
53  
54  
55  
56  
57  
58  
59  
60



## Introduction

A total of 37.9 million people around the world were estimated to be living with HIV at the end of 2018 [1]. Gay, bisexual and queer (GBQ) men are at disproportionately higher risk of acquiring HIV, relative to the general population [2, 3]. Young GBQ men are a subset of the broader GBQ male community who are especially vulnerable to HIV and other sexually transmitted infections (STI) acquisition. In Singapore, GBQ men between the age of 15 to 39 years old account for 66.3% of all incident HIV cases among GBQ men from the first reported case of HIV in 1986, up to 2018 [4].

Rates of HIV testing have also remained suboptimal among GBQ men in a variety of settings, including Southeast Asia. A study among young GBQ men in the Association of Southeast Asian Nations countries in 2015 found that 29.9% of participants had never had an HIV test, and these were more likely to be among younger GBQ men [5]. Unwillingness to know about their HIV status, the fear of a positive result, and low perceived risk of HIV acquisition were factors found to be associated with lower rates of HIV testing among young GBQ men [6, 7].

As such, there exist numerous types of interventions that aim to increase HIV testing among GBQ men. These interventions range from those that utilise aspects of peer education, outreach through social media, reminder-based systems, video-based interventions and national social marketing campaigns. These social marketing campaigns were commonly promoted in neighbourhoods where a larger population of GBQ men resided and had substantial number of businesses catering to them [8-12]. For reminder-based interventions, participants were recruited from sexual health clinics that they were, at the point of recruitment, attending, either for check-ups or testing [13-15]. With regards to the other online interventions such as outreach through social media and peer education, participants

1  
2  
3 were recruited through key websites and mobile phone apps identified to be frequented by  
4  
5 GBQ men [16-22].  
6

7  
8 These interventions reported varying degrees of effectiveness in achieving the aims of  
9  
10 increasing HIV testing and overall disease awareness. Reminder-based interventions, where  
11  
12 participants were reminded every three to six months to go for testing through short message  
13  
14 reminders sent from designated sexual health clinics, were customised to suit the participants'  
15  
16 level of sexual activity and were effective in promoting the uptake of HIV testing [13-15].  
17  
18 Broader scale HIV/STI social marketing campaigns, such as "Stop the Sores" and "Stop the  
19  
20 Drama Downunder" from the United States and Australia respectively, were generally well-  
21  
22 received and were found to be effective in promoting HIV/STI testing, as well as  
23  
24 participants' knowledge on HIV/STI at the population or community level [9, 11].  
25  
26 Interventions that collaborated with popular opinion leaders to disseminate HIV prevention  
27  
28 messages to GBQ male social networks have also shown success in encouraging desired HIV  
29  
30 preventive behaviours [19, 20]. However, for existing video-based interventions, evidence of  
31  
32 their efficacies was not conclusive. In a video-based intervention study conducted in Peru  
33  
34 between 2007 to 2008, among participants who self-identified as gay, differences in intention  
35  
36 to test for HIV was not statistically significant between the intervention and control arm,  
37  
38 although participants who identified as non-gay did show increased willingness to do so [22].  
39  
40 Several studies also assessed the efficacy of crowdsourced videos on HIV testing, and largely  
41  
42 found that they were non-inferior to regular health marketing campaigns [18], or only had a  
43  
44 positive effect on HIV testing rates through the use of home-based self-testing kits, but not  
45  
46 facility-based HIV/STI testing [23].  
47  
48  
49  
50  
51  
52

53  
54 There are, however, several limitations in the context of reach and feasibility for such  
55  
56 interventions. For example, reminder-based and peer education-based interventions require  
57  
58 existing health systems that can support such interventions, which may not be feasible in most  
59  
60

1  
2  
3 settings that do not have such services, or where GBQ male-specific clinical services are  
4  
5 unavailable due to the criminalisation of sex between men. As such, these interventions may  
6  
7 fall short of reaching out to more niche subsets of the GBQ male communities who may be  
8  
9 more discreet about their sexual identities and hence may not often visit gay venues or sexual  
10  
11 health clinics where these interventions are typically offered [24]. Furthermore, while social  
12  
13 marketing campaigns have been effective in increasing the uptake of HIV/STI testing, such  
14  
15 campaigns may not be feasible in settings such as Asia where negative perceptions of, or  
16  
17 attitudes toward GBQ men prevail [5]. There have been, however, successes for the impact of  
18  
19 social marketing campaigns on HIV/STI testing in the region such as the ‘I Test, Do You?’  
20  
21 campaign in Vietnam, and the ‘TestXXX’ campaigns across the capitals of Thailand,  
22  
23 Vietnam, The Philippines, and Indonesia [25, 26].  
24  
25  
26  
27

28  
29 The present study is novel in Asia in evaluating the effectiveness of a web drama  
30  
31 series in achieving positive HIV/STI testing-related outcomes for young GBQ men. The  
32  
33 videos used in the study forms the second season of an educational and web drama  
34  
35 miniseries, People Like Us (PLU), developed by gayhealth.sg and Action for AIDS (AFA) in  
36  
37 2018 (<https://www.gayhealth.sg/plu/>). The first season of the miniseries was screened as a  
38  
39 total of 10 film festivals, and won several independent film awards. It had also garnered more  
40  
41 than 1.7 million views across various social media platforms since its launch in 2016. In spite  
42  
43 of its popularity, little has been done to assess its efficacy in positively impacting HIV/STI  
44  
45 testing-related outcomes. If found to be efficacious in improving HIV/STI testing-related  
46  
47 outcomes, such web dramas may serve as complementary interventions, alongside clinically-  
48  
49 based ones, as such web drama series have proven to be easily accessible and shareable,  
50  
51 which may facilitate reaching GBQ men who might not have access healthcare services as a  
52  
53 result of key structural barriers, such as stigma.  
54  
55  
56  
57  
58  
59  
60

## Methods and analysis

### *Study aims and design*

This is a pragmatic, parallel group, randomised controlled trial to evaluate the efficacy of a web drama series, developed by a community-based organisation in Singapore, in increasing an individual's intention to test, self-reported testing behaviors, and self-reported regularity of testing behaviors for HIV, Syphilis, as well as other common sexually transmitted infection [27] such as Gonorrhoea and Chlamydia. The trial also aims to evaluate the impact of the web drama series on self-reported risk perception for HIV/STI, knowledge of HIV, risks associated with acquiring sexually transmitted infections and HIV pre-exposure prophylaxis, consistent condom use for anal sex with casual partners, incidence of sexually transmitted infections, connectedness to the lesbian, gay, bisexual and transgender (LGBT) community, self-concealment of sexual orientation, perceived homophobia, internalised homophobia, HIV testing self-efficacy and HIV testing social norms. The pragmatic nature of this trial arises due to the prospect of contamination, as the web drama series had been launched in January 2019. The implications of this are further discussed later in the manuscript.

### *Study setting*

As of end-2018, a total of 8,295 Singaporeans had been reported to the Ministry of Health (MOH) in Singapore as having acquired HIV [28]. HIV transmission in Singapore is concentrated among key populations, namely among GBQ men and heterosexual men. With regard to HIV testing uptake, about 71.7% of Singapore residents living with HIV are estimated to know their HIV status as of end-2014 [29]. While GBQ men are more likely than their heterosexual counterparts to be diagnosed through voluntary screening, only 20.0% of incident cases among GBQ men were detected through such means for incident HIV cases

1  
2  
3 reported in the year 2018, compared to 9% among heterosexual individuals. Community-  
4 based organizations have actively and regularly promoted HIV and other STI testing in  
5 venues frequented by GBQ men and older heterosexual men in Singapore since the beginning  
6 of the HIV epidemic [30], there are to our knowledge no available published studies that  
7 evaluate the efficacy of these interventions on individual or community-level testing.  
8  
9

10  
11  
12  
13  
14  
15 HIV testing is widely available at both government-run and private healthcare  
16 providers in Singapore, and under the Infectious Disease Act in Singapore, all individuals  
17 who test positive for HIV must be notified to the MOH within 72 hours of diagnosis. The  
18 anonymous HIV testing scheme was introduced in 1991; under this scheme, no personal  
19 information or identifiers are collected during HIV testing at selected clinics to encourage  
20 testing among individuals who might otherwise be hesitant of having their identities made  
21 known to the authorities. HIV testing is thus only available through facility-based testing,  
22 without any options for self-testing or home-based testing as of end-2019.  
23  
24  
25  
26  
27  
28  
29  
30  
31  
32

33  
34  
35  
36  
37  
38  
39  
40  
41  
42  
43  
44  
45  
46  
47  
48  
49  
50  
51  
52  
53  
54  
55  
56  
57  
58  
59  
60

Singapore society has largely held negative attitudes towards GBQ men and individuals who identify as lesbian, gay, bisexual, and transgender (LGBT) [31-33]. Legally, sexual relations between consenting male individuals is also criminalised under Section 377A of the Singapore penal code, with a penalty of imprisonment for up to two years. A recent study found that Singaporeans were also not in favor of its repeal [34]. Past studies in Singapore have found that the anticipation of such forms of sexual orientation-based stigma as well as structural forms of stigma and discrimination have a negative impact, while the availability of prompts or peer influence, and accessibility of services were found to have a positive impact on HIV/STI testing among GBQ men [24, 35, 36]. This intervention, with its focus on promoting knowledge of available HIV/STI prevention services in Singapore, modelling HIV/STI prevention-related and other health-seeking behaviors, and normalizing

1  
2  
3 GBQ male relationships in Singapore, is thus hypothesized to address some of these barriers  
4  
5 to the uptake of HIV/STI testing.  
6  
7  
8  
9

### 10 *Inclusion and exclusion criteria*

11  
12 Inclusion criteria for participants in this study include self-reporting at the point of  
13 recruitment (i) an HIV-negative status, or being unsure of one's HIV status; (ii) being gay,  
14 bisexual or queer with regard to sexual orientation; (iii) being of male gender, regardless of  
15 sex assigned at birth; (iv) being 18 to 29 years old; (v) being a Singapore citizen or  
16 permanent resident; (vi) and having never watched an online video drama series by  
17 Gayhealth.sg or AFA in the last year.  
18  
19  
20  
21  
22  
23  
24  
25

26 Exclusion criteria for participants in this study include self-reporting at the point of  
27 recruitment (i) having ever watched an online video drama series by Gayhealth.sg or AFA in  
28 the last year; (ii) an HIV-positive status; (iii) not being English-literate; and (iv) being below  
29 18 or above 29 years old.  
30  
31  
32  
33  
34  
35  
36  
37

### 38 *Procedure and randomisation*

39  
40  
41  
42 <Figure 1 about here>  
43  
44  
45  
46

47 A summary of study procedures may be found in Figure 1. Recruitment of  
48 participants will take place through the assistance of community-based organisations in  
49 Singapore, as well as through advertising channels in popular social and sexual networking  
50 apps among young GBQ men. Flyers will be printed and placed at the premises run by  
51 community-based organisations, while social media campaigns will be run on social media  
52 and geosocial networking platforms to recruit participants. To enrol in the study, participant  
53  
54  
55  
56  
57  
58  
59  
60

1  
2  
3 will have to scan a QR code or follow the direct link on the flyer, or click a link on the online  
4 advertisement to access a study enrolment questionnaire. Participants will provide consent for  
5 participation through an online participant information sheet at this point.  
6  
7  
8  
9

10 Participants will follow the link on the online advertisement or flyer to a survey  
11 administration website for a short screening survey where they will be asked for their contact  
12 details as well as their self-reported age, sexual orientation, gender, HIV status, and residence  
13 status to register their intent to join the cohort and for verification of eligibility by the  
14 community-based organisational partner, AFA. Participants will also be asked if they had  
15 ever watched a web drama series by Gayhealth.sg or AFA launched in the past year without  
16 naming the actual series to avoid further contamination. Should the participant be ineligible  
17 to participate, they will be redirected to a disqualification page. Throughout the entire survey  
18 process, personal identifiers will never be directly linked to survey results, so as to protect  
19 participants from potential criminal implications of disclosing their sexual activities with  
20 other men and other behaviors such as substance use.  
21  
22  
23  
24  
25  
26  
27  
28  
29  
30  
31  
32  
33  
34

35 Upon completion of the enrolment survey and verification of eligibility, a staff  
36 member at AFA will contact eligible participants to provide them with their participant ID,  
37 and to formally invite them to participate in the study through the completion of the first  
38 online baseline survey. This survey will be hosted on a survey administration website and  
39 will take about 15 to 20 minutes to complete. Participants will be prompted to enter their  
40 participant ID at the start of the survey so that upon completion, the research team will be  
41 able to notify the team at AFA on the completion of the survey, which will allow for direct  
42 disbursement of a SGD15.00 (~USD10.84) reimbursement to participants. AFA will not have  
43 access to any baseline or follow-up survey responses for the cohort questionnaire, which will  
44 only be made available to the study team.  
45  
46  
47  
48  
49  
50  
51  
52  
53  
54  
55  
56  
57  
58  
59  
60

1  
2  
3  
4  
5  
6  
7  
8  
9  
10  
11  
12  
13  
14  
15  
16  
17  
18  
19  
20  
21  
22  
23  
24  
25  
26  
27  
28  
29  
30  
31  
32  
33  
34  
35  
36  
37

Upon completion of the baseline survey, participants will then be randomly assigned in blocks of six in a 1:1 ratio to the intervention condition or the control comparison condition using a web-based randomization platform (<http://www.sealedenvelope.com>) to ensure even allocation. Individuals who are assigned to the intervention condition will be given a link to a series of six online videos from the PLU web drama series, along with a link to an online sexual health pamphlet tailored for GBQ men in Singapore. Individuals who were assigned to the control condition will be scheduled to receive a link to the same online sexual health pamphlet as the standard of care for GBQ men at risk of acquiring HIV/STI in Singapore. To ensure that all participants eventually receive both interventions, after the 6-month follow-up period is over, the control group will receive the link to the online videos as well. All participants will receive their assigned conditions within one week after completing the baseline survey, and will be asked to complete a quiz one week after assignment to ascertainment if participants had watched the online series and/or read the sexual health pamphlet. Participants will receive a SGD20.00 (~USD14.45) reimbursement following the completion of the quiz.

38  
39  
40  
41  
42  
43  
44  
45  
46  
47  
48  
49  
50  
51  
52  
53  
54  
55  
56  
57  
58  
59  
60

Participants will not be blinded to the group they have been assigned to, and will be told about their chances of being randomised to either group. However, participants will not have access to the content that would only be delivered at the 6-month mark. The decision to provide both groups similar materials at different times ensures that the trial remains ethical, considering we anticipate improvements in sexual health-seeking behavior, and ensures that participants remain motivated to participate, knowing that they would receive similar treatments in spite of randomisation. At the 3-month and 6-month timeframes from the baseline, AFA will contact all eligible participants to continue with their follow-up surveys. Like the baseline survey, the second and third surveys will be hosted on a survey



1  
2  
3 administration website and will take about 15 to 20 minutes to complete. Participants will  
4  
5 receive SGD15.00 (~USD10.84) reimbursement for the completion of each survey.  
6  
7  
8  
9

10 *The intervention: People Like Us web drama series*

11  
12 The online intervention comprises a series of six videos, each about 10-minutes in  
13  
14 length, constituting the second season of a popular web drama series entitled People Like Us.  
15  
16 The series follow the love and sex lives of four ethnically-diverse GBQ men of varying  
17  
18 socioeconomic backgrounds, as they negotiate issues of sexual health, mental health, and  
19  
20 relationships throughout the six-part miniseries. People Like Us miniseries incorporates key  
21  
22 sexual health messages to (i) increase viewers' knowledge and perceptions of HIV/STI risk;  
23  
24 (ii) address homophobia and sexual orientation disclosure; (iii) increase safer-sex negotiation  
25  
26 self-efficacy; (iv) promote positive attitudes towards condom use and other safe sex  
27  
28 behaviors; (v) build skills and self-efficacy for practicing safer sex; (vi) provide information  
29  
30 on HIV/STI testing and its benefits; (vii) provide information on resources for HIV/STI  
31  
32 testing and other mental health services; and (viii) model appropriate behaviors around  
33  
34 practicing safer sex. Each video in the six-part series ends with an educational video segment  
35  
36 featuring the managers and volunteers of AFA and Gayhealth.sg, who provide a brief  
37  
38 synopsis of the episode and cover key points relevant to mental and sexual health for GBQ  
39  
40 men. A list of episodes may also be found in Table 1.  
41  
42  
43  
44  
45  
46  
47  
48

49 *The control condition: Sexual health pamphlet*

50  
51 The intervention group will also be provided with an online sexual health pamphlet  
52  
53 tailored specifically to the needs of GBQ men in Singapore. This pamphlet was developed by  
54  
55 the National Skin Centre and Department of Sexually Transmitted Infections Clinic  
56  
57 specifically for information on sexual wellness among GBQ men. It comprises segments on  
58  
59  
60

1  
2  
3 HIV/STI symptoms, aetiology, information on how to seek help for HIV/STI, as well as  
4  
5 behavioral and biomedical methods of HIV prevention.  
6  
7  
8  
9

#### 10 *Primary outcome measures*

11  
12 Primary outcomes for this evaluation are changes in self-reported intention to test for,  
13  
14 actual testing for, and regularity of testing for HIV, Syphilis, as well as Chlamydia and  
15  
16 Gonorrhoea at the 3-month and 6-month time frames. For example, participants will be asked  
17  
18 “how likely are you to get tested for HIV in the next three months?”, to which they respond  
19  
20 through a 6-point Likert scale from “extremely unlikely to get tested” to “extremely likely to  
21  
22 get tested”. Self-reported testing is ascertained through the question “when did you go for  
23  
24 you last (most recent) voluntary HIV test?” (options to respond include “never”, “in the last 3  
25  
26 months”, “in the last 6 months”, “6 to 12 months ago” and “more than 1 year ago”), while  
27  
28 self-reported regularity of testing will be measured through the question “on average, how  
29  
30 regularly do you test for HIV?” (options to respond include “I do not test regularly”, “once  
31  
32 every few years”, “once a year”, “once every 6 months”, “once every 3 months” and “once a  
33  
34 month”)  
35  
36  
37  
38  
39  
40  
41  
42

#### 43 *Secondary outcome measures*

44  
45 Secondary outcomes include changes in self-reported risk perception for HIV/STI,  
46  
47 knowledge of HIV, knowledge of risks associated with acquiring sexually transmitted  
48  
49 infections, knowledge of HIV pre-exposure prophylaxis, self-reported consistent condom use  
50  
51 for anal sex with casual partners, self-reported incidence of sexually transmitted infections,  
52  
53 and other scales validated among GBQ men in other settings such as connectedness to the  
54  
55 lesbian, gay, bisexual and transgender (LGBT) community [37], self-concealment of sexual  
56  
57  
58  
59  
60

1  
2  
3 orientation [38], perceived homophobia [39], internalised homophobia [40], HIV testing self-  
4 efficacy [41] and HIV testing social norms [42].  
5  
6  
7  
8  
9

### 10 *Sample size*

11  
12 As the primary outcome of interest includes HIV or other STI testing in the last 3  
13 months, we utilise data from a recent study conducted in 2018 among 1,098 GBQ men  
14 recruited through Grindr, the popular geosocial networking app [24, 43]. The study found  
15 that 50.4% of respondents reported having had a recent HIV test in the 6 months prior to the  
16 survey. Assuming a 50% increase in recent HIV testing as a result of the intervention, as data  
17 from previous studies based on the impact such a web drama series on recent HIV testing  
18 remains limited [44], a sample size of 112 in each arm will yield statistical power higher than  
19 80% to detect a significant change for the intervention, based on calculations generated by a  
20 web-based software (<http://www.clincalc.com>). A target sample size of 150 participants per  
21 group is proposed to account for an attrition estimate of 25% for each group across the 6-  
22 month follow up. Intention to Treat Analysis (ITT) will be employed to assess intervention  
23 efficacy on the proposed outcomes. Per-protocol analysis will also be conducted to assess the  
24 impact of attrition. Intervention efficacy will be analyzed over the entire study period (from  
25 baseline to the 6-month assessment).  
26  
27  
28  
29  
30  
31  
32  
33  
34  
35  
36  
37  
38  
39  
40  
41  
42  
43  
44  
45  
46

### 47 *Statistical analyses*

48  
49 The baseline equivalence of sociodemographic characteristics and sexual behavior in  
50 the intervention and comparison groups will be compared and statistically significant  
51 variables between the comparison and intervention group would be adjusted in the outcome  
52 evaluation along with the outcome at baseline. For continuous variables, a generalised linear  
53 mixed model will be employed. The mixed models will include intervention status and the  
54  
55  
56  
57  
58  
59  
60

1  
2  
3 time-point of assessment as fixed effects, and individuals as a random effect. Between-group  
4  
5 effect sizes for the continuous outcome variables will be calculated using post-treatment  
6  
7 means and their pooled observed standard deviation. For binary or count outcome variable  
8  
9 evaluation, logistic regression models will be used to compute the crude odds ratios (OR) and  
10  
11 adjusted odds ratios (aOR) of the outcomes in the intervention versus the comparison group  
12  
13 at follow-up. Statistical significance will be set at  $p < 0.05$  without any adjustment across the  
14  
15 multiple, unique primary outcomes. Statistical analyses will be conducted using the statistical  
16  
17 software STATA version 15 (Stata Corp, College Station, TX, USA).  
18  
19  
20  
21  
22

### 23 24 *Pragmatic nature of trial*

25  
26 The PLU web drama series was launched in the community prior to the start of this  
27  
28 study, and thus members of the community might have been exposed to the intervention prior  
29  
30 to the study. However, this study was designated to continue in view of its importance in the  
31  
32 local context to evaluate the efficacy of such web drama series, and to justify further  
33  
34 HIV/STI prevention efforts that utilise online channels. As such, there is a possibility that  
35  
36 control group participants may be exposed to the video series during the 6-month study  
37  
38 period. To mitigate this, we will ensure that details of the online video intervention (i.e. title  
39  
40 of web series, where to access it) will not be included in the participant information sheet –  
41  
42 only basic information on the possibility that they may be randomised to an “online video  
43  
44 intervention” will be mentioned. Furthermore, to reduce the possibility of contamination  
45  
46 occurring in reaction to being asked the screening question, we will avoid using the title of  
47  
48 the web-series but instead ask the question: “Have you ever watched an online video drama  
49  
50 series filmed by Gayhealth.sg or Action for AIDS Singapore in the past year?” as this is  
51  
52 Gayhealth.sg/AFA’s only web series launched in the past year. While the generic nature of  
53  
54 the question may result in under-reporting of viewing the video series, all participants will  
55  
56  
57  
58  
59  
60

1  
2  
3 eventually be able to view the video series and report if they had viewed any of the episodes  
4 prior to, or during the study period. Specifically, participants in the treatment group will be  
5 asked if they had previously watched any of the episodes when they submit the intervention  
6 completion survey one week after the completion of their baseline survey, while the control  
7 group will receive a link to all six episodes of the video intervention alongside their final  
8 survey at the 6-month mark, and will be asked specifically which episodes that they have  
9 watched prior to, or during the intervention period. Intention-to-treat analyses will be  
10 conducted to provide a conservative estimate of the effect of the intervention, regardless of  
11 contamination.  
12  
13  
14  
15  
16  
17  
18  
19  
20  
21  
22

23  
24 A contamination adjusted intention-to-treat (CAITT) analysis may also be performed  
25 [45]. The authors argue that “as-treated” and “per-protocol” analyses result in non-random  
26 omission bias, while “intention-to-treat” analyses underestimate the value of receiving the  
27 treatment. In CAITT, the randomised controlled trial is treated as an instrumental variable,  
28 with treatment assignment as the “instrument.” The effect of treatment assignment on  
29 outcome observed (intention to treat analysis) is adjusted by the percentage of assigned  
30 participants who ultimately receive the treatment (contamination adjustment). The authors  
31 argue that this provides a good estimate of an individual’s risks and benefits of receiving a  
32 treatment, but might overestimate population level treatment benefits.  
33  
34  
35  
36  
37  
38  
39  
40  
41  
42  
43

44  
45 At this point, the study team will rely on self-reported outcomes such as testing  
46 behaviors and HIV/STI diagnoses as it is presently not possible to link clinic attendance, or  
47 laboratory-confirmed diagnostic tests for HIV and other STI to individual participants. These  
48 issues have arisen due to ethical concerns around linking participants’ personal information  
49 to survey results, which collects information on criminalized behavior such as sexual  
50 intercourse with other men, among participants in the sample. However, the findings of this  
51 proposed study will serve as a proof-of-concept for future studies that may be able to obtain  
52  
53  
54  
55  
56  
57  
58  
59  
60

1  
2  
3 funding and state support for other means of testing, such as the use of self-testing kits for  
4  
5 HIV and other STI.  
6  
7  
8  
9

### 10 *Patient and Public Involvement*

11  
12 The research protocol and grant application for this evaluation study was developed in  
13  
14 collaboration with AFA, and its GBQ health programme, Gayhealth.sg. Both AFA and  
15  
16 Gayhealth.sg represent the health interests of the wider GBQ male community and were  
17  
18 instrumental in the design and development of the study protocol. The intervention was  
19  
20 developed by Gayhealth.sg and Action for AIDS Singapore in 2018 following a community  
21  
22 needs assessment exercise that identified the pertinent sexual and mental health issues in the  
23  
24 local GBQ male community. Results of the study will be disseminated to participants and the  
25  
26 wider GBQ male community through both scientific seminars and community-based  
27  
28 symposia, as well as through written, open-access reports.  
29  
30  
31  
32  
33  
34

### 35 **Ethics and dissemination**

#### 36 *Ethics and mitigating potential risks*

37  
38 Ethical approval for this study was granted by the National University of Singapore  
39  
40 Institutional Review Board (Reference Number S-19-059). Ethical issues may arise from the  
41  
42 recruitment of participants engaging in illegal or criminal activities, such as the self-  
43  
44 disclosure of having sex with other men, sex with minors, and the use of recreational drugs.  
45  
46 To mitigate this risk, the main research team will not have access to any participant's  
47  
48 personal identifiers, or access to any participants directly, which will be carried out by AFA.  
49  
50 AFA will only collect participants' contact information to assist in following up on the  
51  
52 surveys, and these will be stored in an encrypted database. On the other hand, staff at AFA  
53  
54 will not have access to the survey data containing individual responses. All participants will  
55  
56  
57  
58  
59  
60

1  
2  
3 be assigned a study identification number and these will subsequently be used for  
4  
5 communication purposes to ensure that no personal identifiers are reflected or stored beyond  
6  
7 the encrypted database.  
8  
9

### 10 11 12 *Dissemination and implications for health promotion and policy*

13  
14  
15 Results of the study will be made available to the public to share the results of the  
16  
17 study with the GBQ male community, and to inform policymakers. Specifically, results of the  
18  
19 study will be communicated in writing through study reports and peer-reviewed journal  
20  
21 articles, and through presentations made in the community, at scientific conferences, and at  
22  
23 policy meetings. If found to be effective, such web drama series hold great promise to  
24  
25 improve HIV/STI testing among GBQ men in Singapore, who are at disproportionate risk of  
26  
27 acquiring HIV/STI relative to the general population. The organic growth and reach of the  
28  
29 web drama series makes it a cost-effective means of improving such sexual health outcomes  
30  
31 among GBQ men, and may serve as a model for other online interventions in Asia, and in  
32  
33 contexts where sexual relations between men remain criminalised.  
34  
35  
36  
37  
38  
39

### 40 41 *Trial status*

42  
43 Recruitment of participants started in September 2019, and the last participant is expected to  
44  
45 reach the primary endpoint (6-month follow-up) in March 2020. Primary data analysis will  
46  
47 begin in April 2020. The dissemination phase of the trial results will commence in May 2020.  
48  
49

50  
51 (3963 words)  
52  
53  
54  
55

56 **Author contributions:** RKJT and WLK wrote the first draft of the protocol. DL, AvT, AdT,  
57  
58 CT and SB developed the materials for the intervention condition and contributed to the  
59  
60

1  
2  
3 details of the intervention in the manuscript. MTC provided access to the standard of care  
4  
5 condition. RKJT, CSW, MLW and MIC obtained funding for the research. All authors  
6  
7 conceived the study and revised the manuscript for relevant scientific content in the final  
8  
9 version of the manuscript.  
10  
11  
12  
13

14 **Funding statement:** This work was supported by Infectious Diseases Programme Research  
15  
16 Grant, Saw Swee Hock School of Public Health, National University of Singapore (SSHSPH  
17  
18 ID-PRG/SeedFund/2018/03). The funder had no role in study design, data collection and  
19  
20 analysis, decision to publish, or preparation of the manuscript.  
21  
22  
23  
24  
25

26 **Competing interests:** None declared.  
27  
28  
29

30 **Patient consent:** Patient consent obtained.  
31  
32  
33  
34

35 **Ethics approval:** Ethics approval for the protocol was obtained from the National University  
36  
37 of Singapore Institutional Review Board (Reference Number S-19-059).  
38  
39  
40  
41

42 **Data availability statement:** Results of this study will be published and disseminated in  
43  
44 peer-reviewed journals, as detailed in the protocol above. Deidentified participant data and  
45  
46 data dictionaries will not be publicly available due to restrictions by the ethics board over  
47  
48 concerns of risk to participants. The datasets generated during and/or analysed for this study  
49  
50 will be available from the corresponding author on reasonable request, following the  
51  
52 completion of the study. Additional documents including the study protocol and statistical  
53  
54 analysis plan will be publicly available through this manuscript and the trial registry,  
55  
56 Clinicaltrials.gov (NCT04021953).  
57  
58  
59  
60



## References

1. UNAIDS. *Global HIV & AIDS statistics — 2019 fact sheet*. 2019 [cited 2019 July 24]; Available from: <https://www.unaids.org/en/resources/fact-sheet>.
2. Beyrer, C., et al., *Global epidemiology of HIV infection in men who have sex with men*. *Lancet* (London, England), 2012. **380**(9839): p. 367-377.
3. Beyrer, C., et al., *Global epidemiology of HIV infection in men who have sex with men*. *Lancet*, 2012. **380**(9839): p. 367-77.
4. Ministry of Health Singapore. *Update on the HIV/AIDS Situation in Singapore 2018 (June 2019)*. 2019 [cited 2019 12 July]; Available from: [https://www.moh.gov.sg/resources-statistics/infectious-disease-statistics/hiv-stats/update-on-the-hiv-aids-situation-in-singapore-2018-\(june-2019\)](https://www.moh.gov.sg/resources-statistics/infectious-disease-statistics/hiv-stats/update-on-the-hiv-aids-situation-in-singapore-2018-(june-2019)).
5. Guadamuz, T.E., et al., *Young, Online and in the Dark: Scaling Up HIV Testing among MSM in ASEAN*. *PloS one*, 2015. **10**(5): p. e0126658-e0126658.
6. Scheim, A.I. and R. Travers, *Barriers and facilitators to HIV and sexually transmitted infections testing for gay, bisexual, and other transgender men who have sex with men*. *AIDS Care*, 2017. **29**(8): p. 990-995.
7. Pharr, J.R., N.L. Lough, and E.E. Ezeanolue, *Barriers to HIV Testing Among Young Men Who Have Sex With Men (MSM): Experiences from Clark County, Nevada*. *Global journal of health science*, 2015. **8**(7): p. 9-17.
8. Stephens, S.C., et al., *Dogs Are Talking: San Francisco's social marketing campaign to increase syphilis screening*. *Sex Transm Dis*, 2010. **37**(3): p. 173-6.
9. Plant, A., et al., *Stop the sores: the making and evaluation of a successful social marketing campaign*. *Health Promot Pract*, 2010. **11**(1): p. 23-33.
10. Plant, A., et al., *Check Yourself: a social marketing campaign to increase syphilis screening in Los Angeles County*. *Sex Transm Dis*, 2014. **41**(1): p. 50-7.
11. Pedrana, A., et al., *Stop the drama Downunder: a social marketing campaign increases HIV/sexually transmitted infection knowledge and testing in Australian gay men*. *Sex Transm Dis*, 2012. **39**(8): p. 651-8.
12. Ahrens, K., et al., *Healthy Penis: San Francisco's Social Marketing Campaign to Increase Syphilis Testing among Gay and Bisexual Men*. *PLOS Medicine*, 2006. **3**(12): p. e474.
13. Zou, H., et al., *A randomised controlled trial to evaluate the impact of sexual health clinic based automated text message reminders on testing of HIV and other sexually transmitted infections in men who have sex with men in China: protocol for the T2T Study*. *BMJ Open*, 2017. **7**(7): p. e015787.
14. Zou, H., et al., *Automated, computer generated reminders and increased detection of gonorrhoea, chlamydia and syphilis in men who have sex with men*. *PLoS One*, 2013. **8**(4): p. e61972.
15. Bourne, C., et al., *Short message service reminder intervention doubles sexually transmitted infection/HIV re-testing rates among men who have sex with men*. *Sex Transm Infect*, 2011. **87**(3): p. 229-31.
16. Zou, H., et al., *Internet-Facilitated, Voluntary Counseling and Testing (VCT) Clinic-Based HIV Testing among Men Who Have Sex with Men in China*. *PLOS ONE*, 2013. **8**(2): p. e51919.
17. Wang, L., et al., *Using Social Media To Increase HIV Testing Among Men Who Have Sex with Men — Beijing, China, 2013–2017*. Vol. 68. 2019. 478-482.
18. Tang, W., et al., *Crowdsourcing HIV Test Promotion Videos: A Noninferiority Randomized Controlled Trial in China*. *Clin Infect Dis*, 2016. **62**(11): p. 1436-1442.

19. Lau, J.T., H.Y. Tsui, and M.M. Lau, *A pilot clustered randomized control trial evaluating the efficacy of a network-based HIV peer-education intervention targeting men who have sex with men in Hong Kong, China*. *AIDS Care*, 2013. **25**(7): p. 812-9.
20. Ko, N.-Y., et al., *Effects of Internet Popular Opinion Leaders (iPOL) Among Internet-Using Men Who Have Sex With Men*. *J Med Internet Res*, 2013. **15**(2): p. e40.
21. Klausner, J.D., D.K. Levine, and C.K. Kent, *Internet-based site-specific interventions for syphilis prevention among gay and bisexual men*. *AIDS Care*, 2004. **16**(8): p. 964-970.
22. Blas, M.M., et al., *Effect of an online video-based intervention to increase HIV testing in men who have sex with men in Peru*. *PloS one*, 2010. **5**(5): p. e10448-e10448.
23. Tang, W., et al., *Crowdsourcing to expand HIV testing among men who have sex with men in China: A closed cohort stepped wedge cluster randomized controlled trial*. *PLOS Medicine*, 2018. **15**(8): p. e1002645.
24. Tan, R.K.J., et al., *Extent and selectivity of sexual orientation disclosure and its association with HIV and other STI testing patterns among gay, bisexual and other men who have sex with men*. *Sexually Transmitted Infections*, 2019: p. sextrans-2018-053866.
25. Asia Pacific Coalition on Male Sexual Health. *APCOM's TestXXX Initiative Launches in Jakarta as TestJKT*. 2017 [cited 2020 January 8]; Available from: <https://www.apcom.org/apcoms-testxxx-initiative-launches-jakarta-testjkt/>.
26. PATH. *HIV Self-Testing in Vietnam*. 2018 [cited 2020 January 8]; Available from: <https://www.path.org/resources/hiv-self-testing-in-vietnam/>.
27. Mustanski, B.S., et al., *HIV in young men who have sex with men: a review of epidemiology, risk and protective factors, and interventions*. *Journal of sex research*, 2011. **48**(2-3): p. 218-253.
28. Ministry of Health Singapore. *Update on the HIV/AIDS situation in Singapore 2018 (June 2019)*. 2019 [cited 2019 July 3]; Available from: [https://www.moh.gov.sg/resources-statistics/infectious-disease-statistics/hiv-stats/update-on-the-hiv-aids-situation-in-singapore-2018-\(june-2019\)](https://www.moh.gov.sg/resources-statistics/infectious-disease-statistics/hiv-stats/update-on-the-hiv-aids-situation-in-singapore-2018-(june-2019)).
29. Ho, Z.J.M., et al., *Using a HIV registry to develop accurate estimates for the HIV care cascade – the Singapore experience*. *Journal of the International AIDS Society*, 2019. **22**(7).
30. Chan, R.K.W., *Can We End the Human Immunodeficiency Virus (HIV) in Singapore?* *Annals Academy of Medicine Singapore*, 2018. **47**: p. 499-501.
31. Mathews, M., et al., *Singapore perspectives 2014: differences*. 2015, Hackensack, N.J;Singapore;: World Scientific Pub. Co.
32. Panchapakesan, C., L. Li, and S.S. Ho, *Examining How Communication and Demographic Factors Relate to Attitudes Toward Legalization of Same-Sex Marriage in Singapore*. *International Journal of Public Opinion Research*, 2014. **26**(3): p. 355-368.
33. Detenber, B.H., et al., *Singaporeans' Attitudes toward Lesbians and Gay Men and their Tolerance of Media Portrayals of Homosexuality*. *International Journal of Public Opinion Research*, 2007. **19**(3): p. 367-379.
34. Chua L. J., S.D., Tan R. K. J., Jie, K. W., *Decriminalisation of Same-sex Relations and Social Attitudes: An Empirical Study of Singapore*. *Hong Kong Law Journal*, 2017. **47**(3): p. 793-824.
35. Tan, R.K.J., et al., *Clinics as spaces of costly disclosure: HIV/STI testing and anticipated stigma among gay, bisexual and queer men*. *Culture, Health & Sexuality*, 2019: p. 1-14.

- 1
- 2
- 3
- 4 36. Tan, R.K.J., et al., *Developing a Typology of HIV/STI Testing Patterns Among Gay, Bisexual, and Queer Men: A Framework to Guide Interventions*. **0**(0): p. 1049732319870174.
- 5
- 6
- 7 37. Frost, D.M. and I.H. Meyer, *Measuring community connectedness among diverse sexual minority populations*. *Journal of sex research*, 2012. **49**(1): p. 36-49.
- 8
- 9 38. Schrimshaw, E.W., et al., *Disclosure and concealment of sexual orientation and the mental health of non-gay-identified, behaviorally bisexual men*. *Journal of consulting and clinical psychology*, 2013. **81**(1): p. 141-153.
- 10
- 11
- 12 39. Smolenski, D.J., et al., *Sexual compulsivity and high-risk sex among Latino men: the role of internalized homonegativity and gay organizations*. *AIDS Care*, 2009. **21**(1): p. 42-9.
- 13
- 14
- 15
- 16 40. Frost, D.M. and I.H. Meyer, *Internalized Homophobia and Relationship Quality among Lesbians, Gay Men, and Bisexuals*. *Journal of counseling psychology*, 2009. **56**(1): p. 97-109.
- 17
- 18
- 19 41. Jamil, M.S., et al., *HIV testing self-efficacy is associated with higher HIV testing frequency and perceived likelihood to self-test among gay and bisexual men %J Sexual Health*. 2017. **14**(2): p. 170-178.
- 20
- 21
- 22
- 23 42. Pettifor, A., et al., *Factors Associated with HIV Testing Among Public Sector Clinic Attendees in Johannesburg, South Africa*. *AIDS and Behavior*, 2010. **14**(4): p. 913-921.
- 24
- 25
- 26 43. Tan, R.K.J., et al., *Cost and anonymity as factors for the effective implementation of pre-exposure prophylaxis: an observational study among gay, bisexual and other men who have sex with men in Singapore %J Sexual Health*. 2018: p. -.
- 27
- 28
- 29 44. Schnall, R., et al., *eHealth Interventions for HIV Prevention in High-Risk Men Who Have Sex With Men: A Systematic Review*. *J Med Internet Res*, 2014. **16**(5): p. e134.
- 30
- 31 45. Sussman, J.B. and R.A. Hayward, *An IV for the RCT: using instrumental variables to adjust for treatment contamination in randomised controlled trials*. *BMJ (Clinical research ed.)*, 2010. **340**: p. c2073-c2073.
- 32
- 33
- 34
- 35
- 36
- 37
- 38
- 39
- 40
- 41
- 42
- 43
- 44
- 45
- 46
- 47
- 48
- 49
- 50
- 51
- 52
- 53
- 54
- 55
- 56
- 57
- 58
- 59
- 60

| Episode | Title              | Synopsis                                                                                                                                                                                                                                    |
|---------|--------------------|---------------------------------------------------------------------------------------------------------------------------------------------------------------------------------------------------------------------------------------------|
| 1       | Pretty in pink     | At Pink Dot, Rai meets Haniff, someone from the same army camp, while Isaac hooks up with someone at his party. Meanwhile, after celebrating their month-sary, Joel introduces his Mom to Ridzwan.                                          |
| 2       | Challenge accepted | As Rai heads out on a first date with Haniff, his Mom discovers a Pink Dot flyer. Joel asks Ridzwan to consider a challenging proposition. Meanwhile, Isaac is unable to concentrate at work and continues to experience pain while peeing. |
| 3       | Signs & omens      | Rai's Mom confronts him about Pink Dot. Isaac is sexually frustrated and receives some disturbing news. Ridzwan seeks out a friend from the past for help while Rai bumps into Haniff, who treats him coldly.                               |
| 4       | Booty call         | Rai's Mom and sister, Priya, discuss Rai's sexuality. Haniff surprisingly agrees to meet Rai again but reveals something that will change their relationship forever. Ridzwan accepts Joel's proposition but will it bring them closer?     |
| 5       | Jeremy from work   | Joel pays Ridzwan a surprise visit and meets Ridzwan's Mom. Rai meets Isaac for advice about Haniff. Back home, Rai's Mom attempts to reconnect with Rai.                                                                                   |
| 6       | A love like ours   | Rai and Haniff book out of army camp together; their desires palpable, and Isaac's party friends desert him. Meanwhile, Joel's frustration with Ridzwan's secrecy reaches a breaking point.                                                 |

**Table 1. List of episodes and synopses of the People Like Us web drama series season two**

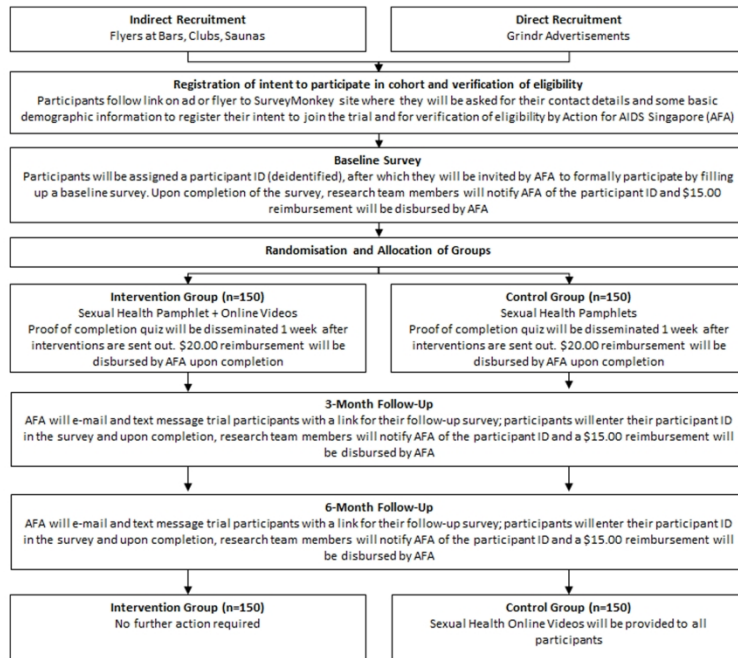

Flowchart for study procedures and randomisation

209x297mm (300 x 300 DPI)

## EVALUATION OF eHEALTH VIDEOS FOR THE SINGAPOREAN GAY, BISEXUAL, AND QUEER MALE COMMUNITY

**Principal investigator:** Mr. Rayner Tan Kay Jin  
Ph.D. Candidate, Saw Swee Hock School of Public Health  
National University of Singapore

**Co-Investigator:** Dr. Mark Chen I-Cheng  
Assistant Professor, Saw Swee Hock School of Public Health  
National University of Singapore

A/Prof Wong Mee Lian  
Associate Professor, Saw Swee Hock School of Public Health  
National University of Singapore

Dr. Wong Chen Seong  
Consultant, Division of Infectious Diseases  
National Center for Infectious Diseases

**Institute:** Saw Swee Hock School of Public Health  
National University of Singapore

You are receiving this invitation to participate in this study as a user or patron of the services rendered by our community partners. Your participation is entirely voluntary, and you may withdraw from this study at any point without any penalty.

This study is interested in finding out more about the effectiveness of health-related online content targeted at young gay, bisexual, and queer (GBQ) men in Singapore. Specifically, among Singaporean (citizen or PR), self-identified gay, bisexual, or queer men, aged 18 to 29 years old who are HIV-negative or do not know their HIV status. Should you not fall within these criteria of respondents, you may choose to stop your participation at this point.

The results of this study will contribute to the pool of research on the social and cultural aspects of physical and psychological health and well-being among gay, bisexual, and queer men in Singapore, and may be shared with organizations or policy makers to positively impact and/or inform policies or interventions that affect gay or bisexual men.

For purposes of administration and follow-up, our non-governmental organization (NGO) partner, Action for AIDS Singapore (AFA) will collect and have access to your contact details based on your chosen preferred mode of communication upon enrollment in this study. No member of the research team will have direct access to your personal identifiers.

While the staff at AFA will assist the research team in managing the trial and its participants, no member of the AFA team will have access to your survey responses, which will be collected by the research team instead. This is done so that your responses will never be directly linked to your personal identifiers. Upon your agreement to participate in this study, you will be assigned a participant ID, which will be used for all future correspondences between AFA and the research team.

This research study has been approved by the National University of Singapore Institutional Review Board with respect to the treatment of individuals participating in this research.

## Purpose of this research study

The study aims to follow participants across six (6) months to find out more about the changes in their health behaviours in response to receiving health-related online content at the start of the study period. Specifically, we will be evaluating the efficacy sexual health interventions that are tailored for gay, bisexual, and queer men in the Singaporean context.

## Procedures

### *Recruitment*

We estimate that we will require a total of 300 participants for the study. Study participants will be enrolled in the trial through direct (advertising through online portals) and indirect (through venue or NGO partners) recruitment. Participants will be followed-up on for a period of six (6) months from the point of their baseline survey, which includes a 1-week evaluation period from the start of the trial, and a survey at the 3-month and 6-month mark, from the start of your participation in the trial.

### *Enrolment into study and verification of eligibility*

Participants follow the recruitment link provided on the online advertisement or physical flyer to a SurveyMonkey (independent survey software service provider) site where they will be asked for their contact details and some basic demographic information to register their intent to join the cohort and for verification of eligibility by the NGO partner, AFA. Only AFA will have access to your contact information. This is a deliberate attempt to delink your behavioral survey responses from any personal identifiers.

### *Baseline survey*

Thereafter, a staff member at AFA will contact eligible participants to provide them with their participant ID, and to formally invite them to participate in the trial through the completion of the first online baseline survey. This survey will be hosted on an online survey administration software (e.g. SurveyMonkey) and will take about 15 to 20 minutes to complete. Participants will be prompted to enter their participant ID at the start of the survey so that upon completion, the research team will be able to notify the team at AFA on the completion of the survey, which will allow for direct disbursement of the \$15.00 reimbursement to participants.

### *Randomization and assignment of treatment*

The online content that we hope to evaluate for this study includes an online sexual health e-pamphlet and a series of sexual health videos. All participants will have access to both components by the end of the trial.

Upon agreement to join us in our trial, a computer will then randomize and allocate each person into one of two possible groups, like the flip of a coin. Neither the researcher nor the participant can decide which treatment the participant receives.

***As mentioned above, you will be randomly assigned into one of two possible groups. The only difference between either group would be your access to the series of sexual health videos.***

Regardless of your assigned group, you will be required to complete the videos and/or read through the e-pamphlet within 1 week following the completion of your baseline survey. A link will be provided 1 week after you have been given the interventions that will lead you to a survey page with a few questions to evaluate your understanding of the interventions' content.

A staff member at AFA will contact you upon successful completion of the baseline survey to provide you with a link to the assigned intervention. The same staff member will contact you again 1 week after that to provide you with the proof of completion survey. This quiz should take no longer than 5 to 10 minutes to complete.

### Follow-up surveys

At the 3-month and 6-month marks from participation, a staff member at AFA will contact all eligible participants to continue with their follow-up surveys. Like the baseline survey, the 2<sup>nd</sup> and 3<sup>rd</sup> surveys will be hosted on an online survey administration software (e.g. SurveyMonkey) and will take about 10 to 15 minutes to complete. Participants will be prompted to enter their participant ID at the start of the survey so that upon completion, the research team will be able to notify the team at AFA on the completion of the survey, which will allow for direct disbursement of the \$15.00 reimbursement to participants, for both the 2<sup>nd</sup> and 3<sup>rd</sup> follow-up surveys.

### Administration of survey and follow-up procedures

All participants will only ever be in contact with the study team's NGO partner, AFA, to protect the anonymity of all participants. The study team will not have access to any of the contact details provided at any point and only the NGO partner will contact participants to fill up the survey online. A participant ID will be issued to participants so that both the research team and NGO partners may refer to the same deidentified number for purposes of administration.

A summary of all study-related procedures may be found in the flow chart below:

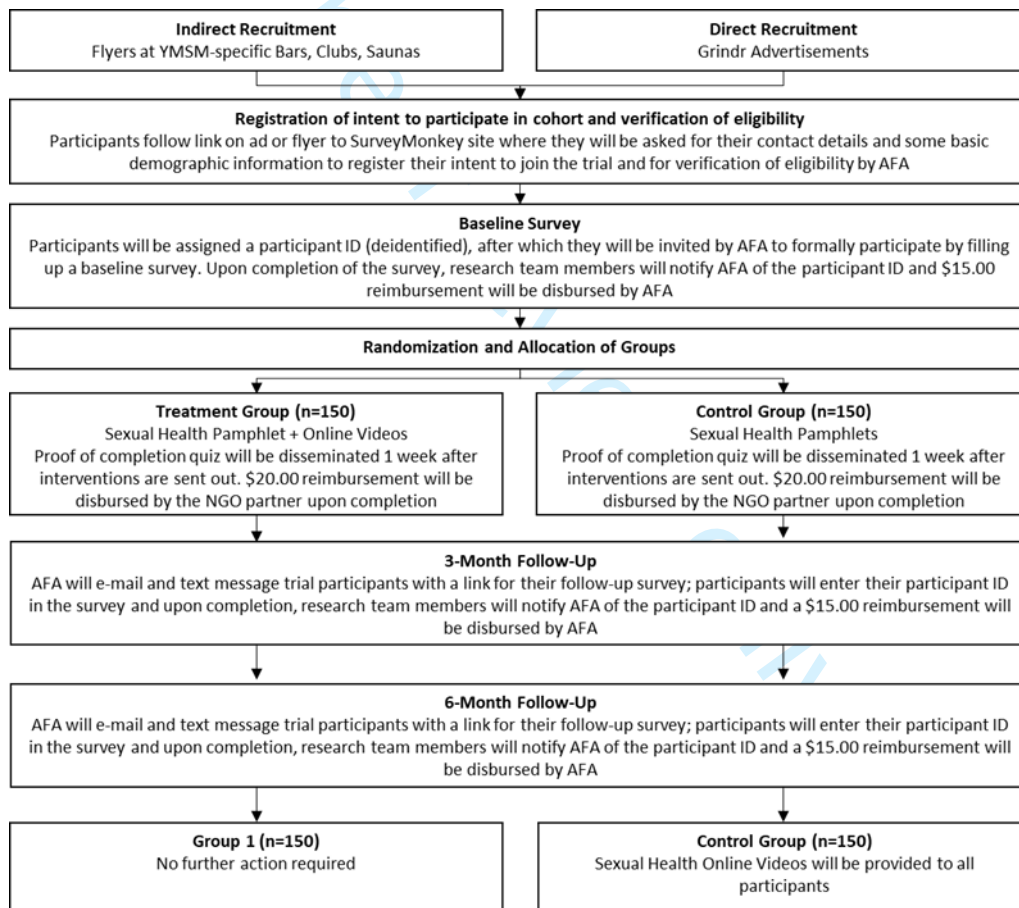

### Possible risks or benefits

The potential risks of taking part in the surveys are minimal. Some questions may reveal criminal activity on the part of participants due to the Misuse of Drugs Act and Section 377A of the Penal Code, but risks are mitigated as the research team will do its best to ensure that personal identifiers will not be directly linked to survey responses. Some questions could make participants feel uncomfortable, but any participants may choose to skip any question or drop out of the study without any penalty at any point in time.



1  
2  
3 The data collected will be relevant for public health practitioners, program managers, and  
4 policy makers in the field of HIV prevention, specifically in decision making and evidence-  
5 based policy making processes.  
6

### 7 **Compensation**

8 Participants will receive reimbursement for their participation and successful completion of  
9 each of the three surveys that will be administered at the baseline (\$15.00), 3-month  
10 (\$15.00), and 6-month (\$15.00) mark of the study. Participants will also receive  
11 reimbursement (\$20.00) upon successful completion of the assigned modules.  
12

### 13 **Right of refusal to participate and withdrawal**

14 Your decision whether or not to participate is completely voluntary and will not affect your  
15 current or future relations with any institution. If you decide to participate, you are free to  
16 withdraw at any point by informing the NGO partner and all your data will be discarded.  
17

### 18 **Confidentiality**

19 Responses will be confidential, as data will only be published or shared with collaborators  
20 (e.g. community and NGO partners) in its aggregated form, and not as individual responses  
21 that may risk the identification of participants. Data will be kept password-locked in Qualtrics,  
22 or in a password-locked dataset or spreadsheet at all times. As the survey is solely  
23 disseminated through our community and NGO partners' existing contact lists, the  
24 researchers have no direct access to respondents of this survey. Only the principal  
25 investigator and the thesis supervisor will have access to the eventual dataset. Upon  
26 completion of the research study, the NGO partner will destroy all documents containing  
27 personal data of the participants to further protect their identities.  
28

### 29 **Contact Details**

30 In the interest of your anonymity and confidentiality for your participation in this study, you  
31 may contact Action for AIDS at (+65) 6254 0212, should you have any questions or require  
32 any clarification about the study procedures, how the results will be utilized for research, and  
33 for more information on the findings of the study, if available.  
34

35 If you have been enrolled in the study but had forgotten your assigned Participant ID, please  
36 get in touch with the staff member that contacted you during enrolment to request for your  
37 Participant ID. Alternatively, you may contact Action for AIDS at (+65) 6254 0212 and  
38 request to speak to the Pink Carpet Y cohort manager.  
39

40 Should you wish to contact the research team, you may approach the principal investigator  
41 (Tan Kay Jin Rayner), by phone at (65) 9187 8576 or by e-mail ([Rayner.tan@u.nus.edu](mailto:Rayner.tan@u.nus.edu)).  
42

43 For an independent opinion regarding the research and the rights of research participants,  
44 you may contact a staff member of the National University of Singapore Institutional Review  
45 Board (Attn: Dr Chan Tuck Wai, at telephone (+65) 6516 1234 or email at [irb@nus.edu.sg](mailto:irb@nus.edu.sg)).  
46

### 47 **Participant's Declaration**

48 *I understand that participation is voluntary. Refusal to participate will involve no penalty. I may  
49 discontinue participation at any time without penalty or loss of accrued benefits (benefits are  
50 accrued in proportion to the amount of study completed or as otherwise stated by the  
51 researcher) to which I am otherwise entitled. I declare that I am at least 18 years of age. If I  
52 am affiliated with the National University of Singapore, my decision to participate, decline, or  
53 withdraw from participation will have no effect on my status at or future relations with the  
54 National University of Singapore. I have read and fully understood the contents of this form,  
55 and hereby give consent to the National University of Singapore to collect, use and disclose  
56 and/or process my responses for the purpose(s) described in this form.*  
57  
58  
59  
60

1  
2  
3  
4 **By clicking the “Continue/Next” button, I consent to participate in this study and agree**  
5 **to all of the above.**  
6

7 If you do not wish to participate in the survey, you may close the browser now to exit.  
8

9 [Next Button]  
10  
11  
12  
13  
14  
15  
16  
17  
18  
19  
20  
21  
22  
23  
24  
25  
26  
27  
28  
29  
30  
31  
32  
33  
34  
35  
36  
37  
38  
39  
40  
41  
42  
43  
44  
45  
46  
47  
48  
49  
50  
51  
52  
53  
54  
55  
56  
57  
58  
59  
60

For peer review only



SPIRIT 2013 Checklist: Recommended items to address in a clinical trial protocol and related documents\*

| Section/item                      | Item No | Description                                                                                                                                                                                                                                                                              | Addressed on page number |
|-----------------------------------|---------|------------------------------------------------------------------------------------------------------------------------------------------------------------------------------------------------------------------------------------------------------------------------------------------|--------------------------|
| <b>Administrative information</b> |         |                                                                                                                                                                                                                                                                                          |                          |
| Title                             | 1       | Descriptive title identifying the study design, population, interventions, and, if applicable, trial acronym                                                                                                                                                                             | 1                        |
| Trial registration                | 2a      | Trial identifier and registry name. If not yet registered, name of intended registry                                                                                                                                                                                                     | 3                        |
|                                   | 2b      | All items from the World Health Organization Trial Registration Data Set                                                                                                                                                                                                                 | N.A.                     |
| Protocol version                  | 3       | Date and version identifier                                                                                                                                                                                                                                                              | N.A.                     |
| Funding                           | 4       | Sources and types of financial, material, and other support                                                                                                                                                                                                                              | 17                       |
| Roles and responsibilities        | 5a      | Names, affiliations, and roles of protocol contributors                                                                                                                                                                                                                                  | 1, 17                    |
|                                   | 5b      | Name and contact information for the trial sponsor                                                                                                                                                                                                                                       | N.A.                     |
|                                   | 5c      | Role of study sponsor and funders, if any, in study design; collection, management, analysis, and interpretation of data; writing of the report; and the decision to submit the report for publication, including whether they will have ultimate authority over any of these activities | 17                       |
|                                   | 5d      | Composition, roles, and responsibilities of the coordinating centre, steering committee, endpoint adjudication committee, data management team, and other individuals or groups overseeing the trial, if applicable (see Item 21a for data monitoring committee)                         | N.A.                     |

1 **Introduction**

2

3 Background and 6a Description of research question and justification for undertaking the trial, including summary of relevant 4-6  
 4 rationale studies (published and unpublished) examining benefits and harms for each intervention

5

6 6b Explanation for choice of comparators 5-6

7

8 Objectives 7 Specific objectives or hypotheses 7

9

10 Trial design 8 Description of trial design including type of trial (eg, parallel group, crossover, factorial, single group),  
 11 allocation ratio, and framework (eg, superiority, equivalence, noninferiority, exploratory) 7

12

13

14 **Methods: Participants, interventions, and outcomes**

15

16 Study setting 9 Description of study settings (eg, community clinic, academic hospital) and list of countries where data will 7-8  
 17 be collected. Reference to where list of study sites can be obtained

18

19 Eligibility criteria 10 Inclusion and exclusion criteria for participants. If applicable, eligibility criteria for study centres and 8  
 20 individuals who will perform the interventions (eg, surgeons, psychotherapists)

21

22 Interventions 11a Interventions for each group with sufficient detail to allow replication, including how and when they will be 11-12  
 23 administered

24

25 11b Criteria for discontinuing or modifying allocated interventions for a given trial participant (eg, drug dose N.A.  
 26 change in response to harms, participant request, or improving/worsening disease)

27

28 11c Strategies to improve adherence to intervention protocols, and any procedures for monitoring adherence N.A.  
 29 (eg, drug tablet return, laboratory tests)

30

31 11d Relevant concomitant care and interventions that are permitted or prohibited during the trial N.A.

32

33

34 Outcomes 12 Primary, secondary, and other outcomes, including the specific measurement variable (eg, systolic blood  
 35 pressure), analysis metric (eg, change from baseline, final value, time to event), method of aggregation (eg, 12-13  
 36 median, proportion), and time point for each outcome. Explanation of the clinical relevance of chosen  
 37 efficacy and harm outcomes is strongly recommended

38

39

40 Participant timeline 13 Time schedule of enrolment, interventions (including any run-ins and washouts), assessments, and visits for 9-11, 22  
 41 participants. A schematic diagram is highly recommended (see Figure)

42

43

44

45

46

|   |             |    |                                                                                                                                                                                       |       |
|---|-------------|----|---------------------------------------------------------------------------------------------------------------------------------------------------------------------------------------|-------|
| 1 | Sample size | 14 | Estimated number of participants needed to achieve study objectives and how it was determined, including clinical and statistical assumptions supporting any sample size calculations | 13-14 |
| 2 |             |    |                                                                                                                                                                                       |       |
| 3 |             |    |                                                                                                                                                                                       |       |
| 4 | Recruitment | 15 | Strategies for achieving adequate participant enrolment to reach target sample size                                                                                                   | 9, 16 |
| 5 |             |    |                                                                                                                                                                                       |       |

### 6 **Methods: Assignment of interventions (for controlled trials)**

#### 7 Allocation:

|    |                    |     |                                                                                                                                                                                                                                                                                                                                                          |      |
|----|--------------------|-----|----------------------------------------------------------------------------------------------------------------------------------------------------------------------------------------------------------------------------------------------------------------------------------------------------------------------------------------------------------|------|
| 8  |                    |     |                                                                                                                                                                                                                                                                                                                                                          |      |
| 9  |                    |     |                                                                                                                                                                                                                                                                                                                                                          |      |
| 10 | Sequence           | 16a | Method of generating the allocation sequence (eg, computer-generated random numbers), and list of any factors for stratification. To reduce predictability of a random sequence, details of any planned restriction (eg, blocking) should be provided in a separate document that is unavailable to those who enrol participants or assign interventions | 9-10 |
| 11 | generation         |     |                                                                                                                                                                                                                                                                                                                                                          |      |
| 12 |                    |     |                                                                                                                                                                                                                                                                                                                                                          |      |
| 13 |                    |     |                                                                                                                                                                                                                                                                                                                                                          |      |
| 14 |                    |     |                                                                                                                                                                                                                                                                                                                                                          |      |
| 15 |                    |     |                                                                                                                                                                                                                                                                                                                                                          |      |
| 16 | Allocation         | 16b | Mechanism of implementing the allocation sequence (eg, central telephone; sequentially numbered, opaque, sealed envelopes), describing any steps to conceal the sequence until interventions are assigned                                                                                                                                                | 9-10 |
| 17 | concealment        |     |                                                                                                                                                                                                                                                                                                                                                          |      |
| 18 | mechanism          |     |                                                                                                                                                                                                                                                                                                                                                          |      |
| 19 |                    |     |                                                                                                                                                                                                                                                                                                                                                          |      |
| 20 | Implementation     | 16c | Who will generate the allocation sequence, who will enrol participants, and who will assign participants to interventions                                                                                                                                                                                                                                | 9-10 |
| 21 |                    |     |                                                                                                                                                                                                                                                                                                                                                          |      |
| 22 |                    |     |                                                                                                                                                                                                                                                                                                                                                          |      |
| 23 |                    |     |                                                                                                                                                                                                                                                                                                                                                          |      |
| 24 | Blinding (masking) | 17a | Who will be blinded after assignment to interventions (eg, trial participants, care providers, outcome assessors, data analysts), and how                                                                                                                                                                                                                | 10   |
| 25 |                    |     |                                                                                                                                                                                                                                                                                                                                                          |      |
| 26 |                    |     |                                                                                                                                                                                                                                                                                                                                                          |      |
| 27 |                    | 17b | If blinded, circumstances under which unblinding is permissible, and procedure for revealing a participant's allocated intervention during the trial                                                                                                                                                                                                     | N.A. |
| 28 |                    |     |                                                                                                                                                                                                                                                                                                                                                          |      |
| 29 |                    |     |                                                                                                                                                                                                                                                                                                                                                          |      |
| 30 |                    |     |                                                                                                                                                                                                                                                                                                                                                          |      |

### 31 **Methods: Data collection, management, and analysis**

|    |                 |     |                                                                                                                                                                                                                                                                                                                                                                                                              |       |
|----|-----------------|-----|--------------------------------------------------------------------------------------------------------------------------------------------------------------------------------------------------------------------------------------------------------------------------------------------------------------------------------------------------------------------------------------------------------------|-------|
| 32 |                 |     |                                                                                                                                                                                                                                                                                                                                                                                                              |       |
| 33 | Data collection | 18a | Plans for assessment and collection of outcome, baseline, and other trial data, including any related processes to promote data quality (eg, duplicate measurements, training of assessors) and a description of study instruments (eg, questionnaires, laboratory tests) along with their reliability and validity, if known. Reference to where data collection forms can be found, if not in the protocol | 10-11 |
| 34 | methods         |     |                                                                                                                                                                                                                                                                                                                                                                                                              |       |
| 35 |                 |     |                                                                                                                                                                                                                                                                                                                                                                                                              |       |
| 36 |                 |     |                                                                                                                                                                                                                                                                                                                                                                                                              |       |
| 37 |                 |     |                                                                                                                                                                                                                                                                                                                                                                                                              |       |
| 38 |                 | 18b | Plans to promote participant retention and complete follow-up, including list of any outcome data to be collected for participants who discontinue or deviate from intervention protocols                                                                                                                                                                                                                    | 15-16 |
| 39 |                 |     |                                                                                                                                                                                                                                                                                                                                                                                                              |       |
| 40 |                 |     |                                                                                                                                                                                                                                                                                                                                                                                                              |       |
| 41 |                 |     |                                                                                                                                                                                                                                                                                                                                                                                                              |       |
| 42 |                 |     |                                                                                                                                                                                                                                                                                                                                                                                                              |       |

|    |                                 |     |                                                                                                                                                                                                                                                                                                                                       |       |
|----|---------------------------------|-----|---------------------------------------------------------------------------------------------------------------------------------------------------------------------------------------------------------------------------------------------------------------------------------------------------------------------------------------|-------|
| 1  | Data management                 | 19  | Plans for data entry, coding, security, and storage, including any related processes to promote data quality (eg, double data entry; range checks for data values). Reference to where details of data management procedures can be found, if not in the protocol                                                                     | N.A.  |
| 2  |                                 |     |                                                                                                                                                                                                                                                                                                                                       |       |
| 3  |                                 |     |                                                                                                                                                                                                                                                                                                                                       |       |
| 4  |                                 |     |                                                                                                                                                                                                                                                                                                                                       |       |
| 5  | Statistical methods             | 20a | Statistical methods for analysing primary and secondary outcomes. Reference to where other details of the statistical analysis plan can be found, if not in the protocol                                                                                                                                                              | 14    |
| 6  |                                 |     |                                                                                                                                                                                                                                                                                                                                       |       |
| 7  |                                 |     |                                                                                                                                                                                                                                                                                                                                       |       |
| 8  |                                 | 20b | Methods for any additional analyses (eg, subgroup and adjusted analyses)                                                                                                                                                                                                                                                              | 14-16 |
| 9  |                                 |     |                                                                                                                                                                                                                                                                                                                                       |       |
| 10 |                                 | 20c | Definition of analysis population relating to protocol non-adherence (eg, as randomised analysis), and any statistical methods to handle missing data (eg, multiple imputation)                                                                                                                                                       | 14-16 |
| 11 |                                 |     |                                                                                                                                                                                                                                                                                                                                       |       |
| 12 |                                 |     |                                                                                                                                                                                                                                                                                                                                       |       |
| 13 |                                 |     |                                                                                                                                                                                                                                                                                                                                       |       |
| 14 | <b>Methods: Monitoring</b>      |     |                                                                                                                                                                                                                                                                                                                                       |       |
| 15 |                                 |     |                                                                                                                                                                                                                                                                                                                                       |       |
| 16 | Data monitoring                 | 21a | Composition of data monitoring committee (DMC); summary of its role and reporting structure; statement of whether it is independent from the sponsor and competing interests; and reference to where further details about its charter can be found, if not in the protocol. Alternatively, an explanation of why a DMC is not needed | 18    |
| 17 |                                 |     |                                                                                                                                                                                                                                                                                                                                       |       |
| 18 |                                 |     |                                                                                                                                                                                                                                                                                                                                       |       |
| 19 |                                 |     |                                                                                                                                                                                                                                                                                                                                       |       |
| 20 |                                 |     |                                                                                                                                                                                                                                                                                                                                       |       |
| 21 |                                 |     |                                                                                                                                                                                                                                                                                                                                       |       |
| 22 |                                 | 21b | Description of any interim analyses and stopping guidelines, including who will have access to these interim results and make the final decision to terminate the trial                                                                                                                                                               | N.A.  |
| 23 |                                 |     |                                                                                                                                                                                                                                                                                                                                       |       |
| 24 |                                 |     |                                                                                                                                                                                                                                                                                                                                       |       |
| 25 | Harms                           | 22  | Plans for collecting, assessing, reporting, and managing solicited and spontaneously reported adverse events and other unintended effects of trial interventions or trial conduct                                                                                                                                                     | N.A.  |
| 26 |                                 |     |                                                                                                                                                                                                                                                                                                                                       |       |
| 27 |                                 |     |                                                                                                                                                                                                                                                                                                                                       |       |
| 28 | Auditing                        | 23  | Frequency and procedures for auditing trial conduct, if any, and whether the process will be independent from investigators and the sponsor                                                                                                                                                                                           | N.A.  |
| 29 |                                 |     |                                                                                                                                                                                                                                                                                                                                       |       |
| 30 |                                 |     |                                                                                                                                                                                                                                                                                                                                       |       |
| 31 |                                 |     |                                                                                                                                                                                                                                                                                                                                       |       |
| 32 | <b>Ethics and dissemination</b> |     |                                                                                                                                                                                                                                                                                                                                       |       |
| 33 |                                 |     |                                                                                                                                                                                                                                                                                                                                       |       |
| 34 | Research ethics approval        | 24  | Plans for seeking research ethics committee/institutional review board (REC/IRB) approval                                                                                                                                                                                                                                             | N.A.  |
| 35 |                                 |     |                                                                                                                                                                                                                                                                                                                                       |       |
| 36 |                                 |     |                                                                                                                                                                                                                                                                                                                                       |       |
| 37 | Protocol amendments             | 25  | Plans for communicating important protocol modifications (eg, changes to eligibility criteria, outcomes, analyses) to relevant parties (eg, investigators, REC/IRBs, trial participants, trial registries, journals, regulators)                                                                                                      | 16-17 |
| 38 |                                 |     |                                                                                                                                                                                                                                                                                                                                       |       |
| 39 |                                 |     |                                                                                                                                                                                                                                                                                                                                       |       |
| 40 |                                 |     |                                                                                                                                                                                                                                                                                                                                       |       |
| 41 |                                 |     |                                                                                                                                                                                                                                                                                                                                       |       |
| 42 |                                 |     |                                                                                                                                                                                                                                                                                                                                       |       |
| 43 |                                 |     |                                                                                                                                                                                                                                                                                                                                       |       |
| 44 |                                 |     |                                                                                                                                                                                                                                                                                                                                       |       |
| 45 |                                 |     |                                                                                                                                                                                                                                                                                                                                       |       |
| 46 |                                 |     |                                                                                                                                                                                                                                                                                                                                       |       |

|    |                               |     |                                                                                                                                                                                                                                                                                     |       |
|----|-------------------------------|-----|-------------------------------------------------------------------------------------------------------------------------------------------------------------------------------------------------------------------------------------------------------------------------------------|-------|
| 1  | Consent or assent             | 26a | Who will obtain informed consent or assent from potential trial participants or authorised surrogates, and how (see Item 32)                                                                                                                                                        | 9, 16 |
| 2  |                               |     |                                                                                                                                                                                                                                                                                     |       |
| 3  |                               |     |                                                                                                                                                                                                                                                                                     |       |
| 4  |                               | 26b | Additional consent provisions for collection and use of participant data and biological specimens in ancillary studies, if applicable                                                                                                                                               | N.A.  |
| 5  |                               |     |                                                                                                                                                                                                                                                                                     |       |
| 6  |                               |     |                                                                                                                                                                                                                                                                                     |       |
| 7  | Confidentiality               | 27  | How personal information about potential and enrolled participants will be collected, shared, and maintained in order to protect confidentiality before, during, and after the trial                                                                                                | 16    |
| 8  |                               |     |                                                                                                                                                                                                                                                                                     |       |
| 9  |                               |     |                                                                                                                                                                                                                                                                                     |       |
| 10 | Declaration of interests      | 28  | Financial and other competing interests for principal investigators for the overall trial and each study site                                                                                                                                                                       | 18    |
| 11 |                               |     |                                                                                                                                                                                                                                                                                     |       |
| 12 |                               |     |                                                                                                                                                                                                                                                                                     |       |
| 13 | Access to data                | 29  | Statement of who will have access to the final trial dataset, and disclosure of contractual agreements that limit such access for investigators                                                                                                                                     | N.A.  |
| 14 |                               |     |                                                                                                                                                                                                                                                                                     |       |
| 15 |                               |     |                                                                                                                                                                                                                                                                                     |       |
| 16 | Ancillary and post-trial care | 30  | Provisions, if any, for ancillary and post-trial care, and for compensation to those who suffer harm from trial participation                                                                                                                                                       | N.A.  |
| 17 |                               |     |                                                                                                                                                                                                                                                                                     |       |
| 18 |                               |     |                                                                                                                                                                                                                                                                                     |       |
| 19 |                               |     |                                                                                                                                                                                                                                                                                     |       |
| 20 | Dissemination policy          | 31a | Plans for investigators and sponsor to communicate trial results to participants, healthcare professionals, the public, and other relevant groups (eg, via publication, reporting in results databases, or other data sharing arrangements), including any publication restrictions | 16-17 |
| 21 |                               |     |                                                                                                                                                                                                                                                                                     |       |
| 22 |                               |     |                                                                                                                                                                                                                                                                                     |       |
| 23 |                               |     |                                                                                                                                                                                                                                                                                     |       |
| 24 |                               | 31b | Authorship eligibility guidelines and any intended use of professional writers                                                                                                                                                                                                      | N.A.  |
| 25 |                               |     |                                                                                                                                                                                                                                                                                     |       |
| 26 |                               | 31c | Plans, if any, for granting public access to the full protocol, participant-level dataset, and statistical code                                                                                                                                                                     | 16-17 |
| 27 |                               |     |                                                                                                                                                                                                                                                                                     |       |
| 28 |                               |     |                                                                                                                                                                                                                                                                                     |       |
| 29 | <b>Appendices</b>             |     |                                                                                                                                                                                                                                                                                     |       |
| 30 |                               |     |                                                                                                                                                                                                                                                                                     |       |
| 31 | Informed consent materials    | 32  | Model consent form and other related documentation given to participants and authorised surrogates                                                                                                                                                                                  | N.A.  |
| 32 |                               |     |                                                                                                                                                                                                                                                                                     |       |
| 33 |                               |     |                                                                                                                                                                                                                                                                                     |       |
| 34 | Biological specimens          | 33  | Plans for collection, laboratory evaluation, and storage of biological specimens for genetic or molecular analysis in the current trial and for future use in ancillary studies, if applicable                                                                                      | N.A.  |
| 35 |                               |     |                                                                                                                                                                                                                                                                                     |       |
| 36 |                               |     |                                                                                                                                                                                                                                                                                     |       |

\*It is strongly recommended that this checklist be read in conjunction with the SPIRIT 2013 Explanation & Elaboration for important clarification on the items. Amendments to the protocol should be tracked and dated. The SPIRIT checklist is copyrighted by the SPIRIT Group under the Creative Commons [“Attribution-NonCommercial-NoDerivs 3.0 Unported”](https://creativecommons.org/licenses/by-nc-nd/3.0/) license.

# BMJ Open

**Effect of a web drama video series on HIV and other sexually transmitted infection testing among gay, bisexual and queer men: study protocol for a community-based, pragmatic, randomised controlled trial in Singapore – the People Like Us (PLU) Evaluation Study**

|                                 |                                                                                                                                                                                                                                                                                                                                                                                                                                                                                                                                                                                                                                                                                                                                                                                                                                            |
|---------------------------------|--------------------------------------------------------------------------------------------------------------------------------------------------------------------------------------------------------------------------------------------------------------------------------------------------------------------------------------------------------------------------------------------------------------------------------------------------------------------------------------------------------------------------------------------------------------------------------------------------------------------------------------------------------------------------------------------------------------------------------------------------------------------------------------------------------------------------------------------|
| Journal:                        | <i>BMJ Open</i>                                                                                                                                                                                                                                                                                                                                                                                                                                                                                                                                                                                                                                                                                                                                                                                                                            |
| Manuscript ID                   | bmjopen-2019-033855.R2                                                                                                                                                                                                                                                                                                                                                                                                                                                                                                                                                                                                                                                                                                                                                                                                                     |
| Article Type:                   | Protocol                                                                                                                                                                                                                                                                                                                                                                                                                                                                                                                                                                                                                                                                                                                                                                                                                                   |
| Date Submitted by the Author:   | 07-Feb-2020                                                                                                                                                                                                                                                                                                                                                                                                                                                                                                                                                                                                                                                                                                                                                                                                                                |
| Complete List of Authors:       | Tan, Rayner Kay Jin; National University Singapore Saw Swee Hock School of Public Health,<br>Koh, Wee Ling; National University Singapore Saw Swee Hock School of Public Health<br>Le, Daniel; Action for AIDS Singapore<br>Tan, Avin; Action for AIDS Singapore<br>Tyler, Adrian; Action for AIDS Singapore<br>Tan, Calvin; Action for AIDS Singapore<br>Banerjee, Sumita; Action for AIDS Singapore<br>Wong, Chen Seong; National Centre for Infectious Diseases; National University Singapore Yong Loo Lin School of Medicine<br>Wong, Mee-Lian; National University Singapore Saw Swee Hock School of Public Health<br>Chio, Martin; National Skin Centre, Department of STI Control (DSC) Clinic<br>Chen, Mark I-Cheng; National University Singapore Saw Swee Hock School of Public Health; National Centre for Infectious Diseases |
| <b>Primary Subject Heading</b>: | Sexual health                                                                                                                                                                                                                                                                                                                                                                                                                                                                                                                                                                                                                                                                                                                                                                                                                              |
| Secondary Subject Heading:      | Diagnostics, HIV/AIDS, Infectious diseases, Public health                                                                                                                                                                                                                                                                                                                                                                                                                                                                                                                                                                                                                                                                                                                                                                                  |
| Keywords:                       | HIV & AIDS < INFECTIOUS DISEASES, INFECTIOUS DISEASES, Epidemiology < INFECTIOUS DISEASES, Public health < INFECTIOUS DISEASES, SOCIAL MEDICINE                                                                                                                                                                                                                                                                                                                                                                                                                                                                                                                                                                                                                                                                                            |
|                                 |                                                                                                                                                                                                                                                                                                                                                                                                                                                                                                                                                                                                                                                                                                                                                                                                                                            |

SCHOLARONE™  
Manuscripts



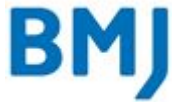

I, the Submitting Author has the right to grant and does grant on behalf of all authors of the Work (as defined in the below author licence), an exclusive licence and/or a non-exclusive licence for contributions from authors who are: i) UK Crown employees; ii) where BMJ has agreed a CC-BY licence shall apply, and/or iii) in accordance with the terms applicable for US Federal Government officers or employees acting as part of their official duties; on a worldwide, perpetual, irrevocable, royalty-free basis to BMJ Publishing Group Ltd ("BMJ") its licensees and where the relevant Journal is co-owned by BMJ to the co-owners of the Journal, to publish the Work in this journal and any other BMJ products and to exploit all rights, as set out in our [licence](#).

The Submitting Author accepts and understands that any supply made under these terms is made by BMJ to the Submitting Author unless you are acting as an employee on behalf of your employer or a postgraduate student of an affiliated institution which is paying any applicable article publishing charge ("APC") for Open Access articles. Where the Submitting Author wishes to make the Work available on an Open Access basis (and intends to pay the relevant APC), the terms of reuse of such Open Access shall be governed by a Creative Commons licence – details of these licences and which [Creative Commons](#) licence will apply to this Work are set out in our licence referred to above.

Other than as permitted in any relevant BMJ Author's Self Archiving Policies, I confirm this Work has not been accepted for publication elsewhere, is not being considered for publication elsewhere and does not duplicate material already published. I confirm all authors consent to publication of this Work and authorise the granting of this licence.

1  
2  
3 **Effect of a web drama video series on HIV and other sexually transmitted infection**  
4 **testing among gay, bisexual and queer men: study protocol for a community-based,**  
5 **pragmatic, randomised controlled trial in Singapore – the People Like Us (PLU)**  
6  
7  
8

9  
10 **Evaluation Study**  
11

12  
13  
14  
15 **Authors:**

16  
17 Rayner Kay Jin Tan<sup>1</sup>, Wee Ling Koh<sup>1</sup>, Daniel Le<sup>2,†</sup>, Avin Tan<sup>2</sup>, Adrian Tyler<sup>2</sup>, Calvin Tan<sup>2</sup>,

18  
19 Sumita Banerjee<sup>2</sup>, Chen Seong Wong<sup>3,4</sup>, Wong Mee Lian<sup>1</sup>, Martin Tze-Wei Chio<sup>5</sup>, Mark I-

20  
21 Cheng Chen<sup>1,4</sup>  
22  
23  
24  
25  
26

27 <sup>1</sup>Saw Swee Hock School of Public Health, National University of Singapore, Singapore

28  
29 <sup>2</sup>Action for AIDS Singapore, Singapore

30  
31 <sup>3</sup>Yong Loo Lin School of Medicine, National University of Singapore, Singapore

32  
33 <sup>4</sup>National Centre for Infectious Diseases, Singapore

34  
35 <sup>5</sup>Department of STI Control (DSC) Clinic, National Skin Centre, Singapore  
36  
37  
38  
39  
40

41 <sup>†</sup> Co-author's current affiliation is at the National University Hospital, National University

42  
43  
44  
45 Health System, Singapore  
46  
47  
48

49 **Corresponding author:**

50  
51 Name: Mr Rayner Kay Jin Tan

52  
53 Address: Saw Swee Hock School of Public Health, Tahir Foundation Building, National

54  
55 University of Singapore, 12 Science Drive 2, #10-01, Singapore 117549

56  
57 Telephone number: (65) 9187 8576  
58  
59  
60

1  
2  
3  
4  
5  
6  
7  
8  
9  
10  
11  
12  
13  
14  
15  
16  
17  
18  
19  
20  
21  
22  
23  
24  
25  
26  
27  
28  
29  
30  
31  
32  
33  
34  
35  
36  
37  
38  
39  
40  
41  
42  
43  
44  
45  
46  
47  
48  
49  
50  
51  
52  
53  
54  
55  
56  
57  
58  
59  
60

Email: rayner.tan@u.nus.edu

For peer review only

1  
2  
3 **Effect of a web drama video series on HIV and other sexually transmitted infection**  
4 **testing among gay, bisexual and queer men: study protocol for a community-based,**  
5 **pragmatic, randomised controlled trial in Singapore– the People Like Us (PLU)**  
6  
7  
8  
9

10 **Evaluation Study**  
11  
12  
13

14 **Abstract**  
15

16  
17 **Introduction:**Gay, bisexual and queer (GBQ) men are at disproportionately higher risk of  
18 acquiring HIV and other sexually transmitted infections. While HIV/STI testing rates among  
19 GBQ men are increasing worldwide, they remain suboptimal in a variety of settings.  
20  
21  
22

23 **Methods and analysis:**The study is a pragmatic, randomised controlled trial design to  
24 evaluate an online video series developed by a community-based organisation in Singapore  
25 for GBQ men. A total of 300 HIV-negative, GBQ men in Singapore aged 18 to 29 years old  
26 will be recruited for this study. Participants will subsequently be randomised into the  
27 intervention arm (n=150) and the control arm (n=150). The intervention arm (n=150) will be  
28 assigned the intervention along with sexual health information via a pamphlet, while the  
29 control group (n=150) will be assigned only the sexual health information via a  
30 pamphlet. Participants should also not have watched the video prior to their participation in  
31 this study, which will be ascertained through a questionnaire. Primary outcomes for this  
32 evaluation are changes in self-reported intention to test for, actual testing for, and regularity  
33 of testing for HIV, Syphilis, Chlamydia and Gonorrhoea at the 3-month and 6-month post-  
34 intervention. Secondary outcomes include changes in self-reported risk perception for HIV  
35 and other sexually transmitted infections, knowledge of HIV, knowledge of risks associated  
36 with acquiring sexually transmitted infections, knowledge of HIV pre-exposure prophylaxis,  
37 consistent condom use for anal sex with casual partners, incidence of sexually transmitted  
38 infections, connectedness to the lesbian, gay, bisexual and transgender (LGBT) community,  
39  
40  
41  
42  
43  
44  
45  
46  
47  
48  
49  
50  
51  
52  
53  
54  
55  
56  
57  
58  
59  
60

1  
2  
3 self-concealment of sexual orientation, perceived homophobia, internalised homophobia,  
4  
5 HIV testing self-efficacy and HIV testing social norms.  
6

7  
8 **Ethics and dissemination:** The study has been approved by the National University of  
9  
10 Singapore Institutional Review Board (S-19-059) and registered at Clinicaltrials.gov  
11  
12 (NCT04021953). The results will be published in peer-reviewed academic journals and  
13  
14 disseminated to community-based organisations and policymakers.  
15  
16

17  
18  
19 **Trial registration:** Clinicaltrials.gov, NCT04021953  
20  
21

## 22 23 24 **Article summary**

### 25 26 *Strengths and limitations of this study*

- 27  
28 • The first randomised controlled trial to evaluate the efficacy of a popular web-based  
29  
30 drama series on HIV/STI testing for young gay, bisexual and queer men in Singapore
- 31  
32 • A collaboration with a community-based organisation in Singapore with strong public  
33  
34 health translation potential
- 35  
36 • Only self-reported data on HIV and other STI diagnoses are collected which cannot be  
37  
38 validated through laboratory-confirmed tests
- 39  
40 • While steps have been taken to mitigate contamination, the risks nonetheless exist as the  
41  
42 intervention material is available to the public
- 43  
44 • Sex between men is criminalised in Singapore which may impact participation among  
45  
46 sub-populations of the target population
- 47  
48  
49  
50  
51  
52  
53  
54  
55  
56  
57  
58  
59  
60

## Introduction

A total of 37.9 million people around the world were estimated to be living with HIV at the end of 2018 [1]. Gay, bisexual and queer (GBQ) men are at disproportionately higher risk of acquiring HIV, relative to the general population [2, 3]. Young GBQ men are a subset of the broader GBQ male community who are especially vulnerable to HIV and other sexually transmitted infections (STI) acquisition. In Singapore, GBQ men between the age of 15 to 39 years old account for 66.3% of all incident HIV cases among GBQ men from the first reported case of HIV in 1986, up to 2018 [4].

Rates of HIV testing have also remained suboptimal among GBQ men in a variety of settings, including Southeast Asia. A study among young GBQ men in the Association of Southeast Asian Nations countries in 2015 found that 29.9% of participants had never had an HIV test, and these were more likely to be among younger GBQ men [5]. Unwillingness to know about their HIV status, the fear of a positive result, and low perceived risk of HIV acquisition were factors found to be associated with lower rates of HIV testing among young GBQ men [6, 7].

As such, there exist numerous types of interventions that aim to increase HIV testing among GBQ men. These interventions range from those that utilise aspects of peer education, outreach through social media, reminder-based systems, video-based interventions and national social marketing campaigns. These social marketing campaigns were commonly promoted in neighbourhoods where a larger population of GBQ men resided and had substantial number of businesses catering to them [8-12]. For reminder-based interventions, participants were recruited from sexual health clinics that they were, at the point of recruitment, attending, either for check-ups or testing [13-15]. With regards to the other online interventions such as outreach through social media and peer education, participants

1  
2  
3 were recruited through key websites and mobile phone apps identified to be frequented by  
4  
5 GBQ men [16-22].  
6

7  
8 These interventions reported varying degrees of effectiveness in achieving the aims of  
9  
10 increasing HIV testing and overall disease awareness. Reminder-based interventions, where  
11  
12 participants were reminded every three to six months to go for testing through short message  
13  
14 reminders sent from designated sexual health clinics, were customised to suit the participants'  
15  
16 level of sexual activity and were effective in promoting the uptake of HIV testing [13-15].  
17  
18 Broader scale HIV/STI social marketing campaigns, such as "Stop the Sores" and "Stop the  
19  
20 Drama Downunder" from the United States and Australia respectively, were generally well-  
21  
22 received and were found to be effective in promoting HIV/STI testing, as well as participants'  
23  
24 knowledge on HIV/STI at the population or community level [9, 11]. Interventions that  
25  
26 collaborated with popular opinion leaders to disseminate HIV prevention messages to GBQ  
27  
28 male social networks have also shown success in encouraging desired HIV preventive  
29  
30 behaviours [19, 20]. However, for existing video-based interventions, evidence of their  
31  
32 efficacies was not conclusive. In a video-based intervention study conducted in Peru between  
33  
34 2007 to 2008, among participants who self-identified as gay, differences in intention to test  
35  
36 for HIV was not statistically significant between the intervention and control arm, although  
37  
38 participants who identified as non-gay did show increased willingness to do so [22]. Several  
39  
40 studies also assessed the efficacy of crowdsourced videos on HIV testing, and largely found  
41  
42 that they were non-inferior to regular health marketing campaigns [18], or only had a positive  
43  
44 effect on HIV testing rates through the use of home-based self-testing kits, but not facility-  
45  
46 based HIV/STI testing [23].  
47  
48  
49  
50  
51  
52

53  
54 There are, however, several limitations in the context of reach and feasibility for such  
55  
56 interventions. For example, reminder-based and peer education-based interventions require  
57  
58 existing health systems that can support such interventions, which may not be feasible in most  
59  
60

1  
2  
3 settings that do not have such services, or where GBQ male-specific clinical services are  
4  
5 unavailable due to the criminalisation of sex between men. As such, these interventions  
6  
7 may fall short of reaching out to more niche subsets of the GBQ male communities who may  
8  
9 be more discreet about their sexual identities and hence may not often visit gay venues or  
10  
11 sexual health clinics where these interventions are typically offered[24]. Furthermore, while  
12  
13 social marketing campaigns have been effective in increasing the uptake of HIV/STI testing,  
14  
15 such campaigns may not be feasible in settings such as Asia where negative perceptions of,  
16  
17 or attitudes toward GBQ men prevail [5]. There have been, however, successes for the impact  
18  
19 of social marketing campaigns on HIV/STI testing in the region such as the ‘I Test, Do You?’  
20  
21 campaign in Vietnam, and the ‘TestXXX’ campaigns across the capitals of Thailand,  
22  
23 Vietnam, The Philippines, and Indonesia [25, 26].  
24  
25  
26  
27

28  
29 The present study is novel in Asia in evaluating the effectiveness of a web drama  
30  
31 series in achieving positive HIV/STI testing-related outcomes for young GBQ men. The  
32  
33 videos used in the study forms the second season of an educational and web drama miniseries,  
34  
35 People Like Us (PLU), developed by gayhealth.sg and Action for AIDS (AFA) in 2018  
36  
37 (<https://www.gayhealth.sg/plu/>). The first season of the miniseries was screened as a total of  
38  
39 10 film festivals, and won several independent film awards. It had also garnered more than  
40  
41 1.7 million views across various social media platforms since its launch in 2016. In spite of  
42  
43 its popularity, little has been done to assess its efficacy in positively impacting HIV/STI  
44  
45 testing-related outcomes. If found to be efficacious in improving HIV/STI testing-related  
46  
47 outcomes, such web dramas may serve as complementary interventions, alongside clinically-  
48  
49 based ones, as such web drama series have proven to be easily accessible and shareable,  
50  
51 which may facilitate reaching GBQ men who might not have access healthcare services as a  
52  
53 result of key structural barriers, such as stigma.  
54  
55  
56  
57  
58  
59  
60



## Methods and analysis

### *Study aims and design*

This is a pragmatic, parallel group, randomised controlled trial to evaluate the efficacy of a web drama series, developed by a community-based organisation in Singapore, in increasing an individual's intention to test, self-reported testing behaviors, and self-reported regularity of testing behaviors for HIV, Syphilis, as well as other common sexually transmitted infection [27] such as Gonorrhoea and Chlamydia. The trial also aims to evaluate the impact of the web drama series on self-reported risk perception for HIV/STI, knowledge of HIV, risks associated with acquiring sexually transmitted infections and HIV pre-exposure prophylaxis, consistent condom use for anal sex with casual partners, incidence of sexually transmitted infections, connectedness to the lesbian, gay, bisexual and transgender (LGBT) community, self-concealment of sexual orientation, perceived homophobia, internalised homophobia, HIV testing self-efficacy and HIV testing social norms. The pragmatic nature of this trial arises due to the prospect of contamination, as the web drama series had been launched in January 2019. The implications of this are further discussed later in the manuscript.

### *Study setting*

As of end-2018, a total of 8,295 Singaporeans had been reported to the Ministry of Health (MOH) in Singapore as having acquired HIV[28]. HIV transmission in Singapore is concentrated among key populations, namely among GBQ men and heterosexual men. With regard to HIV testing uptake, about 71.7% of Singapore residents living with HIV are estimated to know their HIV status as of end-2014 [29]. While GBQ men are more likely than their heterosexual counterparts to be diagnosed through voluntary screening, only 20.0% of incident cases among GBQ men were detected through such means for incident HIV cases

1  
2  
3 reported in the year 2018, compared to 9% among heterosexual individuals. Community-  
4 based organizations have actively and regularly promoted HIV and other STI testing in  
5 venues frequented by GBQ men and older heterosexual men in Singapore since the beginning  
6 of the HIV epidemic [30], there are to our knowledge no available published studies that  
7 evaluate the efficacy of these interventions on individual or community-level testing.  
8  
9

10  
11  
12  
13  
14  
15 HIV testing is widely available at both government-run and private healthcare  
16 providers in Singapore, and under the Infectious Disease Act in Singapore, all individuals  
17 who test positive for HIV must be notified to the MOH within 72 hours of diagnosis. The  
18 anonymous HIV testing scheme was introduced in 1991; under this scheme, no personal  
19 information or identifiers are collected during HIV testing at selected clinics to encourage  
20 testing among individuals who might otherwise be hesitant of having their identities made  
21 known to the authorities. HIV testing is thus only available through facility-based testing,  
22 without any options for self-testing or home-based testing as of end-2019.  
23  
24  
25  
26  
27  
28  
29  
30  
31  
32

33  
34 Singapore society has largely held negative attitudes towards GBQ men and  
35 individuals who identify as lesbian, gay, bisexual, and transgender (LGBT) [31-33]. Legally,  
36 sexual relations between consenting male individuals is also criminalised under Section 377A  
37 of the Singapore penal code, with a penalty of imprisonment for up to two years. A recent  
38 study found that Singaporeans were also not in favor of its repeal [34]. Past studies in  
39 Singapore have found that the anticipation of such forms of sexual orientation-based stigma  
40 as well as structural forms of stigma and discrimination have a negative impact, while the  
41 availability of prompts or peer influence, and accessibility of services were found to have a  
42 positive impact on HIV/STI testing among GBQ men [24, 35, 36]. This intervention, with its  
43 focus on promoting knowledge of available HIV/STI prevention services in Singapore,  
44 modelling HIV/STI prevention-related and other health-seeking behaviors, and normalizing  
45  
46  
47  
48  
49  
50  
51  
52  
53  
54  
55  
56  
57  
58  
59  
60

1  
2  
3 GBQ male relationships in Singapore, is thus hypothesized to address some of these barriers  
4  
5 to the uptake of HIV/STI testing.  
6  
7  
8  
9

### 10 *Inclusion and exclusion criteria*

11  
12 Inclusion criteria for participants in this study include self-reporting at the point of  
13 recruitment (i) an HIV-negative status, or being unsure of one's HIV status; (ii) being gay,  
14 bisexual or queer with regard to sexual orientation; (iii) being of male gender, regardless of  
15 sex assigned at birth; (iv) being 18 to 29 years old; (v) being a Singapore citizen or  
16 permanent resident; (vi) and having never watched an online video drama series by  
17 Gayhealth.sg or AFA in the last year.  
18  
19  
20  
21  
22  
23  
24  
25

26 Exclusion criteria for participants in this study include self-reporting at the point of  
27 recruitment (i) having ever watched an online video drama series by Gayhealth.sg or AFA in  
28 the last year; (ii) an HIV-positive status; (iii) not being English-literate; and (iv) being below  
29 18 or above 29 years old.  
30  
31  
32  
33  
34  
35  
36  
37

### 38 *Procedure and randomisation*

39  
40  
41  
42 <Figure 1 about here>  
43  
44  
45  
46

47 A summary of study procedures may be found in Figure 1. Recruitment of  
48 participants will take place through the assistance of community-based organisations in  
49 Singapore, as well as through advertising channels in popular social and sexual networking  
50 apps among young GBQ men. Flyers will be printed and placed at the premises run by  
51 community-based organisations, while social media campaigns will be run on social media  
52 and geosocial networking platforms to recruit participants. To enrol in the study, participant  
53  
54  
55  
56  
57  
58  
59  
60

1  
2  
3 will have to scan a QR code or follow the direct link on the flyer, or click a link on the online  
4 advertisement to access a study enrolment questionnaire. Participants will provide consent for  
5 participation through an online participant information sheet at this point(See Supplementary  
6 File).  
7  
8  
9  
10  
11

12 Participants will follow the link on the online advertisement or flyer to a survey  
13 administration website for a short screening survey where they will be asked for their contact  
14 details as well as theirself-reported age, sexual orientation, gender, HIV status, and residence  
15 status to register their intent to join the cohort and for verification of eligibility by the  
16 community-based organisational partner, AFA. Participants will also be asked if they had ever  
17 watched a web drama series by Gayhealth.sg or AFA launched in the past year without  
18 naming the actual series to avoid further contamination. Should the participant be ineligible  
19 to participate, they will be redirected to a disqualification page. Throughout the entire survey  
20 process, personal identifiers will never be directly linked to survey results, so as to protect  
21 participants from potential criminal implications of disclosing their sexual activities with  
22 other men and other behaviors such as substance use.  
23  
24  
25  
26  
27  
28  
29  
30  
31  
32  
33  
34  
35  
36  
37

38 Upon completion of the enrolment survey and verification of eligibility, a staff  
39 member at AFA will contact eligible participants to provide them with their participant ID,  
40 and to formally invite them to participate in the study through the completion of the first  
41 online baseline survey. This survey will be hosted on a survey administration website and  
42 will take about 15 to 20 minutes to complete. Participants will be prompted to enter their  
43 participant ID at the start of the survey so that upon completion, the research team will be  
44 able to notify the team at AFA on the completion of the survey, which will allow for direct  
45 disbursement of a SGD15.00 (~USD10.84) reimbursement to participants. AFA will not have  
46 access to any baseline or follow-up survey responses for the cohort questionnaire, which will  
47 only be made available to the study team.  
48  
49  
50  
51  
52  
53  
54  
55  
56  
57  
58  
59  
60

1  
2  
3  
4  
5  
6  
7  
8  
9  
10  
11  
12  
13  
14  
15  
16  
17  
18  
19  
20  
21  
22  
23  
24  
25  
26  
27  
28  
29  
30  
31  
32  
33  
34  
35  
36  
37  
38  
39  
40  
41  
42  
43  
44  
45  
46  
47  
48  
49  
50  
51  
52  
53  
54  
55  
56  
57  
58  
59  
60

Upon completion of the baseline survey, participants will then be randomly assigned in blocks of six in a 1:1 ratio to the intervention condition or the control comparison condition using a web-based randomization platform(<http://www.sealedenvelope.com>) to ensure even allocation. Individuals who are assigned to the intervention condition will be given a link to a series of six online videos from the PLU web drama series, along with a link to an online sexual health pamphlet tailored for GBQ men in Singapore. Individuals who were assigned to the control condition will be scheduled to receive a link to the same online sexual health pamphlet as the standard of care for GBQ men at risk of acquiring HIV/STI in Singapore. To ensure that all participants eventually receive both interventions, after the 6-month follow-up period is over, the control group will receive the link to the online videos as well. All participants will receive their assigned conditions within one week after completing the baseline survey, and will be asked to complete a quiz one week after assignment to ascertain if participants had watched the online series and/or read the sexual health pamphlet. Participants will receive a SGD20.00 (~USD14.45) reimbursement following the completion of the quiz.

Participants will not be blinded to the group they have been assigned to, and will be told about their chances of being randomised to either group. However, participants will not have access to the content that would only be delivered at the 6-month mark. The decision to provide both groups similar materials at different times ensures that the trial remains ethical, considering we anticipate improvements in sexual health-seeking behavior, and ensures that participants remain motivated to participate, knowing that they would receive similar treatments in spite of randomisation. At the 3-month and 6-month timeframes from the baseline, AFA will contact all eligible participants to continue with their follow-up surveys. Like the baseline survey, the second and third surveys will be hosted on a survey

1  
2  
3 administration website and will take about 15 to 20 minutes to complete. Participants will  
4  
5 receive SGD15.00 (~USD10.84) reimbursement for the completion of each survey.  
6  
7  
8  
9

10 *The intervention: People Like Us web drama series*

11  
12 The online intervention comprises a series of six videos, each about 10-minutes in  
13  
14 length, constituting the second season of a popular web drama series entitled People Like  
15  
16 Us. The series follow the love and sex lives of four ethnically-diverse GBQ men of varying  
17  
18 socioeconomic backgrounds, as they negotiate issues of sexual health, mental health, and  
19  
20 relationships throughout the six-part miniseries. People Like Us miniseries incorporates key  
21  
22 sexual health messages to (i) increase viewers' knowledge and perceptions of HIV/STI risk; (ii)  
23  
24 address homophobia and sexual orientation disclosure; (iii) increase safer-sex negotiation  
25  
26 self-efficacy; (iv) promote positive attitudes towards condom use and other safe sex  
27  
28 behaviors; (v) build skills and self-efficacy for practicing safer sex; (vi) provide information  
29  
30 on HIV/STI testing and its benefits; (vii) provide information on resources for HIV/STI  
31  
32 testing and other mental health services; and (viii) model appropriate behaviors around  
33  
34 practicing safer sex. Each video in the six-part series ends with an educational video segment  
35  
36 featuring the managers and volunteers of AFA and Gayhealth.sg, who provide a brief  
37  
38 synopsis of the episode and cover key points relevant to mental and sexual health for GBQ  
39  
40 men. A list of episodes may also be found in Table 1.  
41  
42  
43  
44  
45  
46  
47  
48

49 *The control condition: Sexual health pamphlet*

50  
51 The intervention group will also be provided with an online sexual health  
52  
53 pamphlet tailored specifically to the needs of GBQ men in Singapore. This pamphlet was  
54  
55 developed by the National Skin Centre and Department of Sexually Transmitted Infections  
56  
57 Clinic specifically for information on sexual wellness among GBQ men. It comprises  
58  
59  
60

1  
2  
3 segments on HIV/STI symptoms, aetiology, information on how to seek help for HIV/STI, as  
4 well as behavioral and biomedical methods of HIV prevention.  
5  
6  
7  
8  
9

### 10 *Primary outcome measures*

11  
12 Primary outcomes for this evaluation are changes in self-reported intention to test for,  
13 actual testing for, and regularity of testing for HIV, Syphilis, as well as Chlamydia and  
14 Gonorrhoea at the 3-month and 6-month time frames. For example, participants will be asked  
15 “how likely are you to get tested for HIV in the next three months?”, to which they respond  
16 through a 6-point Likert scale from “extremely unlikely to get tested” to “extremely likely to  
17 get tested”. Self-reported testing is ascertained through the question “when did you go for  
18 you last (most recent) voluntary HIV test?” (options to respond include “never”, “in the last 3  
19 months”, “in the last 6 months”, “6 to 12 months ago” and “more than 1 year ago”), while  
20 self-reported regularity of testing will be measured through the question “on average, how  
21 regularly do you test for HIV?” (options to respond include “I do not test regularly”, “once  
22 every few years”, “once a year”, “once every 6 months”, “once every 3 months” and “once a  
23 month”)  
24  
25  
26  
27  
28  
29  
30  
31  
32  
33  
34  
35  
36  
37  
38  
39  
40  
41  
42  
43

### 44 *Secondary outcome measures*

45 Secondary outcomes include changes in self-reported risk perception for HIV/STI,  
46 knowledge of HIV, knowledge of risks associated with acquiring sexually transmitted  
47 infections, knowledge of HIV pre-exposure prophylaxis, self-reported consistent condom use  
48 for anal sex with casual partners, self-reported incidence of sexually transmitted infections,  
49 and other scales validated among GBQ men in other settings such as connectedness to the  
50 lesbian, gay, bisexual and transgender (LGBT) community[37], self-concealment of sexual  
51  
52  
53  
54  
55  
56  
57  
58  
59  
60

1  
2  
3 orientation[38], perceived homophobia[39], internalised homophobia[40], HIV testing self-  
4 efficacy [41] and HIV testing social norms [42].  
5  
6  
7  
8  
9

### 10 *Sample size*

11  
12 As the primary outcome of interest includes HIV or other STI testing in the last 3  
13 months, we utilise data from a recent study conducted in 2018 among 1,098 GBQ men  
14 recruited through Grindr, the popular geosocial networking app [24, 43]. The study found  
15 that 50.4% of respondents reported having had a recent HIV test in the 6 months prior to the  
16 survey. Assuming a 50% increase in recent HIV testing as a result of the intervention, as data  
17 from previous studies based on the impact such a web drama series on recent HIV testing  
18 remains limited[44], a sample size of 112 in each arm will yield statistical power higher than  
19 80% to detect a significant change for the intervention, based on calculations generated by a  
20 web-based software (<http://www.clincalc.com>). A target sample size of 150 participants per  
21 group is proposed to account for an attrition estimate of 25% for each group across the 6-  
22 month follow up. Intention to Treat Analysis (ITT) will be employed to assess intervention  
23 efficacy on the proposed outcomes. Per-protocol analysis will also be conducted to assess the  
24 impact of attrition. Intervention efficacy will be analyzed over the entire study period (from  
25 baseline to the 6-month assessment).  
26  
27  
28  
29  
30  
31  
32  
33  
34  
35  
36  
37  
38  
39  
40  
41  
42  
43  
44  
45  
46

### 47 *Statistical analyses*

48  
49 The baseline equivalence of sociodemographic characteristics and sexual behavior in  
50 the intervention and comparison groups will be compared and statistically significant  
51 variables between the comparison and intervention group would be adjusted in the outcome  
52 evaluation along with the outcome at baseline. For continuous variables, a generalised linear  
53 mixed model will be employed. The mixed models will include intervention status and the  
54  
55  
56  
57  
58  
59  
60



1  
2  
3 time-point of assessment as fixed effects, and individuals as a random effect. Between-group  
4  
5 effect sizes for the continuous outcome variables will be calculated using post-treatment  
6  
7 means and their pooled observed standard deviation. Logistic and Poisson regression models  
8  
9 will be employed for binary and count outcome data, respectively. Statistical significance  
10  
11 will be set at  $p < 0.05$  without any adjustment across the multiple, unique primary outcomes.  
12  
13  
14 Statistical analyses will be conducted using the statistical software STATA version 15 (Stata  
15  
16 Corp, College Station, TX, USA).  
17  
18

### 19 20 21 *Pragmatic nature of trial*

22  
23  
24 The PLU web drama series was launched in the community prior to the start of this  
25  
26 study, and thus members of the community might have been exposed to the intervention prior  
27  
28 to the study. However, this study was designated to continue in view of its importance in the  
29  
30 local context to evaluate the efficacy of such web drama series, and to justify further  
31  
32 HIV/STI prevention efforts that utilise online channels. As such, there is a possibility that  
33  
34 control group participants may be exposed to the video series during the 6-month study  
35  
36 period. To mitigate this, we will ensure that details of the online video intervention (i.e. title  
37  
38 of web series, where to access it) will not be included in the participant information sheet –  
39  
40 only basic information on the possibility that they may be randomised to an “online video  
41  
42 intervention” will be mentioned. Furthermore, to reduce the possibility of contamination  
43  
44 occurring in reaction to being asked the screening question, we will avoid using the title of  
45  
46 the web-series but instead ask the question: “Have you ever watched an online video drama  
47  
48 series filmed by Gayhealth.sg or Action for AIDS Singapore in the past year?” as this is  
49  
50 Gayhealth.sg/AFA’s only web series launched in the past year. While the generic nature of  
51  
52 the question may result in under-reporting of viewing the video series, all participants will  
53  
54 eventually be able to view the video series and report if they had viewed any of the episodes  
55  
56  
57  
58  
59  
60

1  
2  
3 prior to, or during the study period. Specifically, participants in the treatment group will be  
4 asked if they had previously watched any of the episodes when they submit the intervention  
5 completion survey one week after the completion of their baseline survey, while the control  
6 group will receive a link to all six episodes of the video intervention alongside their final  
7 survey at the 6-month mark, and will be asked specifically which episodes that they have  
8 watched prior to, or during the intervention period. Intention-to-treat analyses will be  
9 conducted to provide a conservative estimate of the effect of the intervention, regardless of  
10 contamination.

11  
12 A contamination adjusted intention-to-treat (CAITT) analysis may also be performed  
13 [45]. The authors argue that “as-treated” and “per-protocol” analyses result in non-random  
14 omission bias, while “intention-to-treat” analyses underestimate the value of receiving the  
15 treatment. In CAITT, the randomised controlled trial is treated as an instrumental variable,  
16 with treatment assignment as the “instrument.” The effect of treatment assignment on  
17 outcome observed (intention to treat analysis) is adjusted by the percentage of assigned  
18 participants who ultimately receive the treatment (contamination adjustment). The authors  
19 argue that this provides a good estimate of an individual’s risks and benefits of receiving a  
20 treatment, but might overestimate population level treatment benefits.

21  
22 At this point, the study team will rely on self-reported outcomes such as testing  
23 behaviors and HIV/STI diagnoses as it is presently not possible to link clinic attendance, or  
24 laboratory-confirmed diagnostic tests for HIV and other STI to individual participants. These  
25 issues have arisen due to ethical concerns around linking participants’ personal information  
26 to survey results, which collects information on criminalized behavior such as sexual  
27 intercourse with other men, among participants in the sample. However, the findings of this  
28 proposed study will serve as a proof-of-concept for future studies that may be able to obtain

1  
2  
3 funding and state support for other means of testing, such as the use of self-testing kits for  
4  
5 HIV and other STI.  
6  
7  
8  
9

### 10 *Patient and Public Involvement*

11  
12 The research protocol and grant application for this evaluation study was developed in  
13  
14 collaboration with AFA, and its GBQ health programme, Gayhealth.sg. Both AFA and  
15  
16 Gayhealth.sg represent the health interests of the wider GBQ male community and were  
17  
18 instrumental in the design and development of the study protocol. The intervention was  
19  
20 developed by Gayhealth.sg and Action for AIDS Singapore in 2018 following a community  
21  
22 needs assessment exercise that identified the pertinent sexual and mental health issues in the  
23  
24 local GBQ male community. Results of the study will be disseminated to participants and the  
25  
26 wider GBQ male community through both scientific seminars and community-based  
27  
28 symposia, as well as through written, open-access reports.  
29  
30  
31  
32  
33  
34

### 35 **Ethics and dissemination**

#### 36 *Ethics and mitigating potential risks*

37  
38 Ethical approval for this study was granted by the National University of Singapore  
39  
40 Institutional Review Board (Reference Number S-19-059). Ethical issues may arise from the  
41  
42 recruitment of participants engaging in illegal or criminal activities, such as the self-  
43  
44 disclosure of having sex with other men, sex with minors, and the use of recreational drugs.  
45  
46 To mitigate this risk, the main research team will not have access to any participant's  
47  
48 personal identifiers, or access to any participants directly, which will be carried out by AFA.  
49  
50 AFA will only collect participants' contact information to assist in following up on the  
51  
52 surveys, and these will be stored in an encrypted database. On the other hand, staff at AFA  
53  
54 will not have access to the survey data containing individual responses. All participants will  
55  
56  
57  
58  
59  
60

1  
2  
3 be assigned a study identification number and these will subsequently be used for  
4  
5 communication purposes to ensure that no personal identifiers are reflected or stored beyond  
6  
7 the encrypted database.  
8  
9

### 10 11 12 *Dissemination and implications for health promotion and policy*

13  
14  
15 Results of the study will be made available to the public to share the results of the  
16  
17 study with the GBQ male community, and to inform policymakers. Specifically, results of the  
18  
19 study will be communicated in writing through study reports and peer-reviewed journal  
20  
21 articles, and through presentations made in the community, at scientific conferences, and at  
22  
23 policy meetings. If found to be effective, such web drama series hold great promise to  
24  
25 improve HIV/STI testing among GBQ men in Singapore, who are at disproportionate risk of  
26  
27 acquiring HIV/STI relative to the general population. The organic growth and reach of the  
28  
29 web drama series makes it a cost-effective means of improving such sexual health outcomes  
30  
31 among GBQ men, and may serve as a model for other online interventions in Asia, and in  
32  
33 contexts where sexual relations between men remain criminalised.  
34  
35  
36  
37  
38  
39

### 40 41 *Trial status*

42  
43 Recruitment of participants started in September 2019, and the last participant is expected to  
44  
45 reach the primary endpoint (6-month follow-up) in March 2020. Primary data analysis will  
46  
47 begin in April 2020. The dissemination phase of the trial results will commence in May 2020.  
48  
49

50  
51 (4388 words)  
52  
53  
54  
55

56 **Author contributions:** RKJT and WLK wrote the first draft of the protocol. DL, AvT, AdT,  
57  
58 CT and SB developed the materials for the intervention condition and contributed to the  
59  
60

1  
2  
3 details of the intervention in the manuscript. MTC provided access to the standard of care  
4  
5 condition. RKJT, CSW, MLW and MIC obtained funding for the research. All authors  
6  
7 conceived the study and revised the manuscript for relevant scientific content in the final  
8  
9 version of the manuscript.  
10  
11  
12  
13

14 **Funding statement:** This work was supported by Infectious Diseases Programme Research  
15  
16 Grant, Saw Swee Hock School of Public Health, National University of Singapore (SSHSPH  
17  
18 ID-PRG/SeedFund/2018/03). The funder had no role in study design, data collection and  
19  
20 analysis, decision to publish, or preparation of the manuscript.  
21  
22  
23  
24  
25

26 **Competing interests:** None declared.  
27  
28  
29

30 **Patient consent:** Patient consent obtained.  
31  
32  
33  
34

35 **Ethics approval:** Ethics approval for the protocol was obtained from the National University  
36  
37 of Singapore Institutional Review Board (Reference Number S-19-059).  
38  
39  
40  
41

42 **Data availability statement:** Results of this study will be published and disseminated in  
43  
44 peer-reviewed journals, as detailed in the protocol above. Deidentified participant data and  
45  
46 data dictionaries will not be publicly available due to restrictions by the ethics board over  
47  
48 concerns of risk to participants. The datasets generated during and/or analysed for this study  
49  
50 will be available from the corresponding author on reasonable request, following the  
51  
52 completion of the study. Additional documents including the study protocol and statistical  
53  
54 analysis plan will be publicly available through this manuscript and the trial registry,  
55  
56 Clinicaltrials.gov (NCT04021953).  
57  
58  
59  
60

## References

1. UNAIDS. *Global HIV & AIDS statistics — 2019 fact sheet*. 2019 [cited 2019 July 24]; Available from: <https://www.unaids.org/en/resources/fact-sheet>.
2. Beyrer, C., et al., *Global epidemiology of HIV infection in men who have sex with men*. *Lancet* (London, England), 2012. **380**(9839): p. 367-377.
3. Beyrer, C., et al., *Global epidemiology of HIV infection in men who have sex with men*. *Lancet*, 2012. **380**(9839): p. 367-77.
4. Ministry of Health Singapore. *Update on the HIV/AIDS Situation in Singapore 2018 (June 2019)*. 2019 [cited 2019 12 July]; Available from: [https://www.moh.gov.sg/resources-statistics/infectious-disease-statistics/hiv-stats/update-on-the-hiv-aids-situation-in-singapore-2018-\(june-2019\)](https://www.moh.gov.sg/resources-statistics/infectious-disease-statistics/hiv-stats/update-on-the-hiv-aids-situation-in-singapore-2018-(june-2019)).
5. Guadamuz, T.E., et al., *Young, Online and in the Dark: Scaling Up HIV Testing among MSM in ASEAN*. *PloS one*, 2015. **10**(5): p. e0126658-e0126658.
6. Scheim, A.I. and R. Travers, *Barriers and facilitators to HIV and sexually transmitted infections testing for gay, bisexual, and other transgender men who have sex with men*. *AIDS Care*, 2017. **29**(8): p. 990-995.
7. Pharr, J.R., N.L. Lough, and E.E. Ezeanolue, *Barriers to HIV Testing Among Young Men Who Have Sex With Men (MSM): Experiences from Clark County, Nevada*. *Global journal of health science*, 2015. **8**(7): p. 9-17.
8. Stephens, S.C., et al., *Dogs Are Talking: San Francisco's social marketing campaign to increase syphilis screening*. *Sex Transm Dis*, 2010. **37**(3): p. 173-6.
9. Plant, A., et al., *Stop the sores: the making and evaluation of a successful social marketing campaign*. *Health Promot Pract*, 2010. **11**(1): p. 23-33.
10. Plant, A., et al., *Check Yourself: a social marketing campaign to increase syphilis screening in Los Angeles County*. *Sex Transm Dis*, 2014. **41**(1): p. 50-7.
11. Pedrana, A., et al., *Stop the drama Downunder: a social marketing campaign increases HIV/sexually transmitted infection knowledge and testing in Australian gay men*. *Sex Transm Dis*, 2012. **39**(8): p. 651-8.
12. Ahrens, K., et al., *Healthy Penis: San Francisco's Social Marketing Campaign to Increase Syphilis Testing among Gay and Bisexual Men*. *PLOS Medicine*, 2006. **3**(12): p. e474.
13. Zou, H., et al., *A randomised controlled trial to evaluate the impact of sexual health clinic based automated text message reminders on testing of HIV and other sexually transmitted infections in men who have sex with men in China: protocol for the T2T Study*. *BMJ Open*, 2017. **7**(7): p. e015787.
14. Zou, H., et al., *Automated, computer generated reminders and increased detection of gonorrhoea, chlamydia and syphilis in men who have sex with men*. *PLoS One*, 2013. **8**(4): p. e61972.
15. Bourne, C., et al., *Short message service reminder intervention doubles sexually transmitted infection/HIV re-testing rates among men who have sex with men*. *Sex Transm Infect*, 2011. **87**(3): p. 229-31.
16. Zou, H., et al., *Internet-Facilitated, Voluntary Counseling and Testing (VCT) Clinic-Based HIV Testing among Men Who Have Sex with Men in China*. *PLOS ONE*, 2013. **8**(2): p. e51919.
17. Wang, L., et al., *Using Social Media To Increase HIV Testing Among Men Who Have Sex with Men — Beijing, China, 2013–2017*. Vol. 68. 2019. 478-482.
18. Tang, W., et al., *Crowdsourcing HIV Test Promotion Videos: A Noninferiority Randomized Controlled Trial in China*. *Clin Infect Dis*, 2016. **62**(11): p. 1436-1442.

19. Lau, J.T., H.Y. Tsui, and M.M. Lau, *A pilot clustered randomized control trial evaluating the efficacy of a network-based HIV peer-education intervention targeting men who have sex with men in Hong Kong, China*. *AIDS Care*, 2013. **25**(7): p. 812-9.
20. Ko, N.-Y., et al., *Effects of Internet Popular Opinion Leaders (iPOL) Among Internet-Using Men Who Have Sex With Men*. *J Med Internet Res*, 2013. **15**(2): p. e40.
21. Klausner, J.D., D.K. Levine, and C.K. Kent, *Internet-based site-specific interventions for syphilis prevention among gay and bisexual men*. *AIDS Care*, 2004. **16**(8): p. 964-970.
22. Blas, M.M., et al., *Effect of an online video-based intervention to increase HIV testing in men who have sex with men in Peru*. *PloS one*, 2010. **5**(5): p. e10448-e10448.
23. Tang, W., et al., *Crowdsourcing to expand HIV testing among men who have sex with men in China: A closed cohort stepped wedge cluster randomized controlled trial*. *PLOS Medicine*, 2018. **15**(8): p. e1002645.
24. Tan, R.K.J., et al., *Extent and selectivity of sexual orientation disclosure and its association with HIV and other STI testing patterns among gay, bisexual and other men who have sex with men*. *Sexually Transmitted Infections*, 2019: p. sextrans-2018-053866.
25. Asia Pacific Coalition on Male Sexual Health. *APCOM's TestXXX Initiative Launches in Jakarta as TestJKT*. 2017 [cited 2020 January 8]; Available from: <https://www.apcom.org/apcoms-testxxx-initiative-launches-jakarta-testjkt/>.
26. PATH. *HIV Self-Testing in Vietnam*. 2018 [cited 2020 January 8]; Available from: <https://www.path.org/resources/hiv-self-testing-in-vietnam/>.
27. Mustanski, B.S., et al., *HIV in young men who have sex with men: a review of epidemiology, risk and protective factors, and interventions*. *Journal of sex research*, 2011. **48**(2-3): p. 218-253.
28. Ministry of Health Singapore. *Update on the HIV/AIDS situation in Singapore 2018 (June 2019)*. 2019 [cited 2019 July 3]; Available from: [https://www.moh.gov.sg/resources-statistics/infectious-disease-statistics/hiv-stats/update-on-the-hiv-aids-situation-in-singapore-2018-\(june-2019\)](https://www.moh.gov.sg/resources-statistics/infectious-disease-statistics/hiv-stats/update-on-the-hiv-aids-situation-in-singapore-2018-(june-2019)).
29. Ho, Z.J.M., et al., *Using a HIV registry to develop accurate estimates for the HIV care cascade – the Singapore experience*. *Journal of the International AIDS Society*, 2019. **22**(7).
30. Chan, R.K.W., *Can We End the Human Immunodeficiency Virus (HIV) in Singapore?* *Annals Academy of Medicine Singapore*, 2018. **47**: p. 499-501.
31. Mathews, M., et al., *Singapore perspectives 2014: differences*. 2015, Hackensack, N.J;Singapore;: World Scientific Pub. Co.
32. Panchapakesan, C., L. Li, and S.S. Ho, *Examining How Communication and Demographic Factors Relate to Attitudes Toward Legalization of Same-Sex Marriage in Singapore*. *International Journal of Public Opinion Research*, 2014. **26**(3): p. 355-368.
33. Detenber, B.H., et al., *Singaporeans' Attitudes toward Lesbians and Gay Men and their Tolerance of Media Portrayals of Homosexuality*. *International Journal of Public Opinion Research*, 2007. **19**(3): p. 367-379.
34. Chua L. J., S.D., Tan R. K. J., Jie, K. W., *Decriminalisation of Same-sex Relations and Social Attitudes: An Empirical Study of Singapore*. *Hong Kong Law Journal*, 2017. **47**(3): p. 793-824.
35. Tan, R.K.J., et al., *Clinics as spaces of costly disclosure: HIV/STI testing and anticipated stigma among gay, bisexual and queer men*. *Culture, Health & Sexuality*, 2019: p. 1-14.

- 1
- 2
- 3
- 4 36. Tan, R.K.J., et al., *Developing a Typology of HIV/STI Testing Patterns Among Gay, Bisexual, and Queer Men: A Framework to Guide Interventions*. **0(0)**: p. 1049732319870174.
- 5
- 6
- 7 37. Frost, D.M. and I.H. Meyer, *Measuring community connectedness among diverse sexual minority populations*. *Journal of sex research*, 2012. **49(1)**: p. 36-49.
- 8
- 9 38. Schrimshaw, E.W., et al., *Disclosure and concealment of sexual orientation and the mental health of non-gay-identified, behaviorally bisexual men*. *Journal of consulting and clinical psychology*, 2013. **81(1)**: p. 141-153.
- 10
- 11
- 12 39. Smolenski, D.J., et al., *Sexual compulsivity and high-risk sex among Latino men: the role of internalized homonegativity and gay organizations*. *AIDS Care*, 2009. **21(1)**: p. 42-9.
- 13
- 14
- 15
- 16 40. Frost, D.M. and I.H. Meyer, *Internalized Homophobia and Relationship Quality among Lesbians, Gay Men, and Bisexuals*. *Journal of counseling psychology*, 2009. **56(1)**: p. 97-109.
- 17
- 18
- 19 41. Jamil, M.S., et al., *HIV testing self-efficacy is associated with higher HIV testing frequency and perceived likelihood to self-test among gay and bisexual men* %J *Sexual Health*. 2017. **14(2)**: p. 170-178.
- 20
- 21
- 22
- 23 42. Pettifor, A., et al., *Factors Associated with HIV Testing Among Public Sector Clinic Attendees in Johannesburg, South Africa*. *AIDS and Behavior*, 2010. **14(4)**: p. 913-921.
- 24
- 25
- 26 43. Tan, R.K.J., et al., *Cost and anonymity as factors for the effective implementation of pre-exposure prophylaxis: an observational study among gay, bisexual and other men who have sex with men in Singapore* %J *Sexual Health*. 2018: p. -.
- 27
- 28
- 29 44. Schnall, R., et al., *eHealth Interventions for HIV Prevention in High-Risk Men Who Have Sex With Men: A Systematic Review*. *J Med Internet Res*, 2014. **16(5)**: p. e134.
- 30
- 31
- 32 45. Sussman, J.B. and R.A. Hayward, *An IV for the RCT: using instrumental variables to adjust for treatment contamination in randomised controlled trials*. *BMJ (Clinical research ed.)*, 2010. **340**: p. c2073-c2073.
- 33
- 34
- 35
- 36
- 37
- 38
- 39
- 40
- 41
- 42
- 43
- 44
- 45
- 46
- 47
- 48
- 49
- 50
- 51
- 52
- 53
- 54
- 55
- 56
- 57
- 58
- 59
- 60



| Episode | Title              | Synopsis                                                                                                                                                                                                                                    |
|---------|--------------------|---------------------------------------------------------------------------------------------------------------------------------------------------------------------------------------------------------------------------------------------|
| 1       | Pretty in pink     | At Pink Dot, Rai meets Haniff, someone from the same army camp, while Isaac hooks up with someone at his party. Meanwhile, after celebrating their month-sary, Joel introduces his Mom to Ridzwan.                                          |
| 2       | Challenge accepted | As Rai heads out on a first date with Haniff, his Mom discovers a Pink Dot flyer. Joel asks Ridzwan to consider a challenging proposition. Meanwhile, Isaac is unable to concentrate at work and continues to experience pain while peeing. |
| 3       | Signs & omens      | Rai's Mom confronts him about Pink Dot. Isaac is sexually frustrated and receives some disturbing news. Ridzwan seeks out a friend from the past for help while Rai bumps into Haniff, who treats him coldly.                               |
| 4       | Booty call         | Rai's Mom and sister, Priya, discuss Rai's sexuality. Haniff surprisingly agrees to meet Rai again but reveals something that will change their relationship forever. Ridzwan accepts Joel's proposition but will it bring them closer?     |
| 5       | Jeremy from work   | Joel pays Ridzwan a surprise visit and meets Ridzwan's Mom. Rai meets Isaac for advice about Haniff. Back home, Rai's Mom attempts to reconnect with Rai.                                                                                   |
| 6       | A love like ours   | Rai and Haniff book out of army camp together; their desires palpable, and Isaac's party friends desert him. Meanwhile, Joel's frustration with Ridzwan's secrecy reaches a breaking point.                                                 |

**Table 1. List of episodes and synopses of the People Like Us web drama series season two**



Flowchart for study procedures and randomisation

209x297mm (300 x 300 DPI)

## EVALUATION OF eHEALTH VIDEOS FOR THE SINGAPOREAN GAY, BISEXUAL, AND QUEER MALE COMMUNITY

**Principal investigator:** Mr. Rayner Tan Kay Jin  
Ph.D. Candidate, Saw Swee Hock School of Public Health  
National University of Singapore

**Co-Investigator:** Dr. Mark Chen I-Cheng  
Assistant Professor, Saw Swee Hock School of Public Health  
National University of Singapore

A/Prof Wong Mee Lian  
Associate Professor, Saw Swee Hock School of Public Health  
National University of Singapore

Dr. Wong Chen Seong  
Consultant, Division of Infectious Diseases  
National Center for Infectious Diseases

**Institute:** Saw Swee Hock School of Public Health  
National University of Singapore

You are receiving this invitation to participate in this study as a user or patron of the services rendered by our community partners. Your participation is entirely voluntary, and you may withdraw from this study at any point without any penalty.

This study is interested in finding out more about the effectiveness of health-related online content targeted at young gay, bisexual, and queer (GBQ) men in Singapore. Specifically, among Singaporean (citizen or PR), self-identified gay, bisexual, or queer men, aged 18 to 29 years old who are HIV-negative or do not know their HIV status. Should you not fall within these criteria of respondents, you may choose to stop your participation at this point.

The results of this study will contribute to the pool of research on the social and cultural aspects of physical and psychological health and well-being among gay, bisexual, and queer men in Singapore, and may be shared with organizations or policy makers to positively impact and/or inform policies or interventions that affect gay or bisexual men.

For purposes of administration and follow-up, our non-governmental organization (NGO) partner, Action for AIDS Singapore (AFA) will collect and have access to your contact details based on your chosen preferred mode of communication upon enrollment in this study. No member of the research team will have direct access to your personal identifiers.

While the staff at AFA will assist the research team in managing the trial and its participants, no member of the AFA team will have access to your survey responses, which will be collected by the research team instead. This is done so that your responses will never be directly linked to your personal identifiers. Upon your agreement to participate in this study, you will be assigned a participant ID, which will be used for all future correspondences between AFA and the research team.

This research study has been approved by the National University of Singapore Institutional Review Board with respect to the treatment of individuals participating in this research.

## Purpose of this research study

The study aims to follow participants across six (6) months to find out more about the changes in their health behaviours in response to receiving health-related online content at the start of the study period. Specifically, we will be evaluating the efficacy sexual health interventions that are tailored for gay, bisexual, and queer men in the Singaporean context.

## Procedures

### *Recruitment*

We estimate that we will require a total of 300 participants for the study. Study participants will be enrolled in the trial through direct (advertising through online portals) and indirect (through venue or NGO partners) recruitment. Participants will be followed-up on for a period of six (6) months from the point of their baseline survey, which includes a 1-week evaluation period from the start of the trial, and a survey at the 3-month and 6-month mark, from the start of your participation in the trial.

### *Enrolment into study and verification of eligibility*

Participants follow the recruitment link provided on the online advertisement or physical flyer to a SurveyMonkey (independent survey software service provider) site where they will be asked for their contact details and some basic demographic information to register their intent to join the cohort and for verification of eligibility by the NGO partner, AFA. Only AFA will have access to your contact information. This is a deliberate attempt to delink your behavioral survey responses from any personal identifiers.

### *Baseline survey*

Thereafter, a staff member at AFA will contact eligible participants to provide them with their participant ID, and to formally invite them to participate in the trial through the completion of the first online baseline survey. This survey will be hosted on an online survey administration software (e.g. SurveyMonkey) and will take about 15 to 20 minutes to complete. Participants will be prompted to enter their participant ID at the start of the survey so that upon completion, the research team will be able to notify the team at AFA on the completion of the survey, which will allow for direct disbursement of the \$15.00 reimbursement to participants.

### *Randomization and assignment of treatment*

The online content that we hope to evaluate for this study includes an online sexual health e-pamphlet and a series of sexual health videos. All participants will have access to both components by the end of the trial.

Upon agreement to join us in our trial, a computer will then randomize and allocate each person into one of two possible groups, like the flip of a coin. Neither the researcher nor the participant can decide which treatment the participant receives.

***As mentioned above, you will be randomly assigned into one of two possible groups. The only difference between either group would be your access to the series of sexual health videos.***

Regardless of your assigned group, you will be required to complete the videos and/or read through the e-pamphlet within 1 week following the completion of your baseline survey. A link will be provided 1 week after you have been given the interventions that will lead you to a survey page with a few questions to evaluate your understanding of the interventions' content.

A staff member at AFA will contact you upon successful completion of the baseline survey to provide you with a link to the assigned intervention. The same staff member will contact you again 1 week after that to provide you with the proof of completion survey. This quiz should take no longer than 5 to 10 minutes to complete.

### Follow-up surveys

At the 3-month and 6-month marks from participation, a staff member at AFA will contact all eligible participants to continue with their follow-up surveys. Like the baseline survey, the 2<sup>nd</sup> and 3<sup>rd</sup> surveys will be hosted on an online survey administration software (e.g. SurveyMonkey) and will take about 10 to 15 minutes to complete. Participants will be prompted to enter their participant ID at the start of the survey so that upon completion, the research team will be able to notify the team at AFA on the completion of the survey, which will allow for direct disbursement of the \$15.00 reimbursement to participants, for both the 2<sup>nd</sup> and 3<sup>rd</sup> follow-up surveys.

### Administration of survey and follow-up procedures

All participants will only ever be in contact with the study team's NGO partner, AFA, to protect the anonymity of all participants. The study team will not have access to any of the contact details provided at any point and only the NGO partner will contact participants to fill up the survey online. A participant ID will be issued to participants so that both the research team and NGO partners may refer to the same deidentified number for purposes of administration.

A summary of all study-related procedures may be found in the flow chart below:



### Possible risks or benefits

The potential risks of taking part in the surveys are minimal. Some questions may reveal criminal activity on the part of participants due to the Misuse of Drugs Act and Section 377A of the Penal Code, but risks are mitigated as the research team will do its best to ensure that personal identifiers will not be directly linked to survey responses. Some questions could make participants feel uncomfortable, but any participants may choose to skip any question or drop out of the study without any penalty at any point in time.

1  
2  
3 The data collected will be relevant for public health practitioners, program managers, and  
4 policy makers in the field of HIV prevention, specifically in decision making and evidence-  
5 based policy making processes.  
6

### 7 **Compensation**

8 Participants will receive reimbursement for their participation and successful completion of  
9 each of the three surveys that will be administered at the baseline (\$15.00), 3-month  
10 (\$15.00), and 6-month (\$15.00) mark of the study. Participants will also receive  
11 reimbursement (\$20.00) upon successful completion of the assigned modules.  
12

### 13 **Right of refusal to participate and withdrawal**

14 Your decision whether or not to participate is completely voluntary and will not affect your  
15 current or future relations with any institution. If you decide to participate, you are free to  
16 withdraw at any point by informing the NGO partner and all your data will be discarded.  
17

### 18 **Confidentiality**

19 Responses will be confidential, as data will only be published or shared with collaborators  
20 (e.g. community and NGO partners) in its aggregated form, and not as individual responses  
21 that may risk the identification of participants. Data will be kept password-locked in Qualtrics,  
22 or in a password-locked dataset or spreadsheet at all times. As the survey is solely  
23 disseminated through our community and NGO partners' existing contact lists, the  
24 researchers have no direct access to respondents of this survey. Only the principal  
25 investigator and the thesis supervisor will have access to the eventual dataset. Upon  
26 completion of the research study, the NGO partner will destroy all documents containing  
27 personal data of the participants to further protect their identities.  
28

### 29 **Contact Details**

30 In the interest of your anonymity and confidentiality for your participation in this study, you  
31 may contact Action for AIDS at (+65) 6254 0212, should you have any questions or require  
32 any clarification about the study procedures, how the results will be utilized for research, and  
33 for more information on the findings of the study, if available.  
34

35 If you have been enrolled in the study but had forgotten your assigned Participant ID, please  
36 get in touch with the staff member that contacted you during enrolment to request for your  
37 Participant ID. Alternatively, you may contact Action for AIDS at (+65) 6254 0212 and  
38 request to speak to the Pink Carpet Y cohort manager.  
39

40 Should you wish to contact the research team, you may approach the principal investigator  
41 (Tan Kay Jin Rayner), by phone at (65) 9187 8576 or by e-mail ([Rayner.tan@u.nus.edu](mailto:Rayner.tan@u.nus.edu)).  
42

43 For an independent opinion regarding the research and the rights of research participants,  
44 you may contact a staff member of the National University of Singapore Institutional Review  
45 Board (Attn: Dr Chan Tuck Wai, at telephone (+65) 6516 1234 or email at [irb@nus.edu.sg](mailto:irb@nus.edu.sg)).  
46

### 47 **Participant's Declaration**

48 *I understand that participation is voluntary. Refusal to participate will involve no penalty. I may  
49 discontinue participation at any time without penalty or loss of accrued benefits (benefits are  
50 accrued in proportion to the amount of study completed or as otherwise stated by the  
51 researcher) to which I am otherwise entitled. I declare that I am at least 18 years of age. If I  
52 am affiliated with the National University of Singapore, my decision to participate, decline, or  
53 withdraw from participation will have no effect on my status at or future relations with the  
54 National University of Singapore. I have read and fully understood the contents of this form,  
55 and hereby give consent to the National University of Singapore to collect, use and disclose  
56 and/or process my responses for the purpose(s) described in this form.*  
57  
58  
59  
60

1  
2  
3  
4 **By clicking the “Continue/Next” button, I consent to participate in this study and agree**  
5 **to all of the above.**  
6

7 If you do not wish to participate in the survey, you may close the browser now to exit.  
8

9 [Next Button]  
10  
11  
12  
13  
14  
15  
16  
17  
18  
19  
20  
21  
22  
23  
24  
25  
26  
27  
28  
29  
30  
31  
32  
33  
34  
35  
36  
37  
38  
39  
40  
41  
42  
43  
44  
45  
46  
47  
48  
49  
50  
51  
52  
53  
54  
55  
56  
57  
58  
59  
60

For peer review only



SPIRIT 2013 Checklist: Recommended items to address in a clinical trial protocol and related documents\*

| Section/item                      | Item No | Description                                                                                                                                                                                                                                                                              | Addressed on page number |
|-----------------------------------|---------|------------------------------------------------------------------------------------------------------------------------------------------------------------------------------------------------------------------------------------------------------------------------------------------|--------------------------|
| <b>Administrative information</b> |         |                                                                                                                                                                                                                                                                                          |                          |
| Title                             | 1       | Descriptive title identifying the study design, population, interventions, and, if applicable, trial acronym                                                                                                                                                                             | 1                        |
| Trial registration                | 2a      | Trial identifier and registry name. If not yet registered, name of intended registry                                                                                                                                                                                                     | 3                        |
|                                   | 2b      | All items from the World Health Organization Trial Registration Data Set                                                                                                                                                                                                                 | N.A.                     |
| Protocol version                  | 3       | Date and version identifier                                                                                                                                                                                                                                                              | N.A.                     |
| Funding                           | 4       | Sources and types of financial, material, and other support                                                                                                                                                                                                                              | 17                       |
| Roles and responsibilities        | 5a      | Names, affiliations, and roles of protocol contributors                                                                                                                                                                                                                                  | 1, 17                    |
|                                   | 5b      | Name and contact information for the trial sponsor                                                                                                                                                                                                                                       | N.A.                     |
|                                   | 5c      | Role of study sponsor and funders, if any, in study design; collection, management, analysis, and interpretation of data; writing of the report; and the decision to submit the report for publication, including whether they will have ultimate authority over any of these activities | 17                       |
|                                   | 5d      | Composition, roles, and responsibilities of the coordinating centre, steering committee, endpoint adjudication committee, data management team, and other individuals or groups overseeing the trial, if applicable (see Item 21a for data monitoring committee)                         | N.A.                     |



1 **Introduction**

2

3 Background and 6a Description of research question and justification for undertaking the trial, including summary of relevant 4-6  
4 rationale studies (published and unpublished) examining benefits and harms for each intervention

5

6 6b Explanation for choice of comparators 5-6

7

8 Objectives 7 Specific objectives or hypotheses 7

9

10 Trial design 8 Description of trial design including type of trial (eg, parallel group, crossover, factorial, single group),  
11 allocation ratio, and framework (eg, superiority, equivalence, noninferiority, exploratory) 7

12

13

14 **Methods: Participants, interventions, and outcomes**

15

16 Study setting 9 Description of study settings (eg, community clinic, academic hospital) and list of countries where data will 7-8  
17 be collected. Reference to where list of study sites can be obtained

18

19 Eligibility criteria 10 Inclusion and exclusion criteria for participants. If applicable, eligibility criteria for study centres and 8  
20 individuals who will perform the interventions (eg, surgeons, psychotherapists)

21

22 Interventions 11a Interventions for each group with sufficient detail to allow replication, including how and when they will be 11-12  
23 administered

24

25 11b Criteria for discontinuing or modifying allocated interventions for a given trial participant (eg, drug dose N.A.  
26 change in response to harms, participant request, or improving/worsening disease)

27

28 11c Strategies to improve adherence to intervention protocols, and any procedures for monitoring adherence N.A.  
29 (eg, drug tablet return, laboratory tests)

30

31 11d Relevant concomitant care and interventions that are permitted or prohibited during the trial N.A.

32

33

34 Outcomes 12 Primary, secondary, and other outcomes, including the specific measurement variable (eg, systolic blood  
35 pressure), analysis metric (eg, change from baseline, final value, time to event), method of aggregation (eg, 12-13  
36 median, proportion), and time point for each outcome. Explanation of the clinical relevance of chosen  
37 efficacy and harm outcomes is strongly recommended

38

39

40 Participant timeline 13 Time schedule of enrolment, interventions (including any run-ins and washouts), assessments, and visits for 9-11, 22  
41 participants. A schematic diagram is highly recommended (see Figure)

42

43

44

45

46

|   |             |    |                                                                                                                                                                                       |       |
|---|-------------|----|---------------------------------------------------------------------------------------------------------------------------------------------------------------------------------------|-------|
| 1 | Sample size | 14 | Estimated number of participants needed to achieve study objectives and how it was determined, including clinical and statistical assumptions supporting any sample size calculations | 13-14 |
| 2 |             |    |                                                                                                                                                                                       |       |
| 3 |             |    |                                                                                                                                                                                       |       |
| 4 | Recruitment | 15 | Strategies for achieving adequate participant enrolment to reach target sample size                                                                                                   | 9, 16 |
| 5 |             |    |                                                                                                                                                                                       |       |

### 6 **Methods: Assignment of interventions (for controlled trials)**

#### 7 Allocation:

|    |                    |     |                                                                                                                                                                                                                                                                                                                                                          |      |
|----|--------------------|-----|----------------------------------------------------------------------------------------------------------------------------------------------------------------------------------------------------------------------------------------------------------------------------------------------------------------------------------------------------------|------|
| 8  |                    |     |                                                                                                                                                                                                                                                                                                                                                          |      |
| 9  |                    |     |                                                                                                                                                                                                                                                                                                                                                          |      |
| 10 | Sequence           | 16a | Method of generating the allocation sequence (eg, computer-generated random numbers), and list of any factors for stratification. To reduce predictability of a random sequence, details of any planned restriction (eg, blocking) should be provided in a separate document that is unavailable to those who enrol participants or assign interventions | 9-10 |
| 11 | generation         |     |                                                                                                                                                                                                                                                                                                                                                          |      |
| 12 |                    |     |                                                                                                                                                                                                                                                                                                                                                          |      |
| 13 |                    |     |                                                                                                                                                                                                                                                                                                                                                          |      |
| 14 |                    |     |                                                                                                                                                                                                                                                                                                                                                          |      |
| 15 |                    |     |                                                                                                                                                                                                                                                                                                                                                          |      |
| 16 | Allocation         | 16b | Mechanism of implementing the allocation sequence (eg, central telephone; sequentially numbered, opaque, sealed envelopes), describing any steps to conceal the sequence until interventions are assigned                                                                                                                                                | 9-10 |
| 17 | concealment        |     |                                                                                                                                                                                                                                                                                                                                                          |      |
| 18 | mechanism          |     |                                                                                                                                                                                                                                                                                                                                                          |      |
| 19 |                    |     |                                                                                                                                                                                                                                                                                                                                                          |      |
| 20 | Implementation     | 16c | Who will generate the allocation sequence, who will enrol participants, and who will assign participants to interventions                                                                                                                                                                                                                                | 9-10 |
| 21 |                    |     |                                                                                                                                                                                                                                                                                                                                                          |      |
| 22 |                    |     |                                                                                                                                                                                                                                                                                                                                                          |      |
| 23 |                    |     |                                                                                                                                                                                                                                                                                                                                                          |      |
| 24 | Blinding (masking) | 17a | Who will be blinded after assignment to interventions (eg, trial participants, care providers, outcome assessors, data analysts), and how                                                                                                                                                                                                                | 10   |
| 25 |                    |     |                                                                                                                                                                                                                                                                                                                                                          |      |
| 26 |                    |     |                                                                                                                                                                                                                                                                                                                                                          |      |
| 27 |                    | 17b | If blinded, circumstances under which unblinding is permissible, and procedure for revealing a participant's allocated intervention during the trial                                                                                                                                                                                                     | N.A. |
| 28 |                    |     |                                                                                                                                                                                                                                                                                                                                                          |      |
| 29 |                    |     |                                                                                                                                                                                                                                                                                                                                                          |      |
| 30 |                    |     |                                                                                                                                                                                                                                                                                                                                                          |      |

### 31 **Methods: Data collection, management, and analysis**

|    |                 |     |                                                                                                                                                                                                                                                                                                                                                                                                              |       |
|----|-----------------|-----|--------------------------------------------------------------------------------------------------------------------------------------------------------------------------------------------------------------------------------------------------------------------------------------------------------------------------------------------------------------------------------------------------------------|-------|
| 32 |                 |     |                                                                                                                                                                                                                                                                                                                                                                                                              |       |
| 33 | Data collection | 18a | Plans for assessment and collection of outcome, baseline, and other trial data, including any related processes to promote data quality (eg, duplicate measurements, training of assessors) and a description of study instruments (eg, questionnaires, laboratory tests) along with their reliability and validity, if known. Reference to where data collection forms can be found, if not in the protocol | 10-11 |
| 34 | methods         |     |                                                                                                                                                                                                                                                                                                                                                                                                              |       |
| 35 |                 |     |                                                                                                                                                                                                                                                                                                                                                                                                              |       |
| 36 |                 |     |                                                                                                                                                                                                                                                                                                                                                                                                              |       |
| 37 |                 |     |                                                                                                                                                                                                                                                                                                                                                                                                              |       |
| 38 |                 | 18b | Plans to promote participant retention and complete follow-up, including list of any outcome data to be collected for participants who discontinue or deviate from intervention protocols                                                                                                                                                                                                                    | 15-16 |
| 39 |                 |     |                                                                                                                                                                                                                                                                                                                                                                                                              |       |
| 40 |                 |     |                                                                                                                                                                                                                                                                                                                                                                                                              |       |
| 41 |                 |     |                                                                                                                                                                                                                                                                                                                                                                                                              |       |
| 42 |                 |     |                                                                                                                                                                                                                                                                                                                                                                                                              |       |

|    |                                 |     |                                                                                                                                                                                                                                                                                                                                       |       |
|----|---------------------------------|-----|---------------------------------------------------------------------------------------------------------------------------------------------------------------------------------------------------------------------------------------------------------------------------------------------------------------------------------------|-------|
| 1  | Data management                 | 19  | Plans for data entry, coding, security, and storage, including any related processes to promote data quality (eg, double data entry; range checks for data values). Reference to where details of data management procedures can be found, if not in the protocol                                                                     | N.A.  |
| 2  |                                 |     |                                                                                                                                                                                                                                                                                                                                       |       |
| 3  |                                 |     |                                                                                                                                                                                                                                                                                                                                       |       |
| 4  |                                 |     |                                                                                                                                                                                                                                                                                                                                       |       |
| 5  | Statistical methods             | 20a | Statistical methods for analysing primary and secondary outcomes. Reference to where other details of the statistical analysis plan can be found, if not in the protocol                                                                                                                                                              | 14    |
| 6  |                                 |     |                                                                                                                                                                                                                                                                                                                                       |       |
| 7  |                                 |     |                                                                                                                                                                                                                                                                                                                                       |       |
| 8  |                                 | 20b | Methods for any additional analyses (eg, subgroup and adjusted analyses)                                                                                                                                                                                                                                                              | 14-16 |
| 9  |                                 |     |                                                                                                                                                                                                                                                                                                                                       |       |
| 10 |                                 | 20c | Definition of analysis population relating to protocol non-adherence (eg, as randomised analysis), and any statistical methods to handle missing data (eg, multiple imputation)                                                                                                                                                       | 14-16 |
| 11 |                                 |     |                                                                                                                                                                                                                                                                                                                                       |       |
| 12 |                                 |     |                                                                                                                                                                                                                                                                                                                                       |       |
| 13 |                                 |     |                                                                                                                                                                                                                                                                                                                                       |       |
| 14 | <b>Methods: Monitoring</b>      |     |                                                                                                                                                                                                                                                                                                                                       |       |
| 15 |                                 |     |                                                                                                                                                                                                                                                                                                                                       |       |
| 16 | Data monitoring                 | 21a | Composition of data monitoring committee (DMC); summary of its role and reporting structure; statement of whether it is independent from the sponsor and competing interests; and reference to where further details about its charter can be found, if not in the protocol. Alternatively, an explanation of why a DMC is not needed | 18    |
| 17 |                                 |     |                                                                                                                                                                                                                                                                                                                                       |       |
| 18 |                                 |     |                                                                                                                                                                                                                                                                                                                                       |       |
| 19 |                                 |     |                                                                                                                                                                                                                                                                                                                                       |       |
| 20 |                                 |     |                                                                                                                                                                                                                                                                                                                                       |       |
| 21 |                                 |     |                                                                                                                                                                                                                                                                                                                                       |       |
| 22 |                                 | 21b | Description of any interim analyses and stopping guidelines, including who will have access to these interim results and make the final decision to terminate the trial                                                                                                                                                               | N.A.  |
| 23 |                                 |     |                                                                                                                                                                                                                                                                                                                                       |       |
| 24 |                                 |     |                                                                                                                                                                                                                                                                                                                                       |       |
| 25 | Harms                           | 22  | Plans for collecting, assessing, reporting, and managing solicited and spontaneously reported adverse events and other unintended effects of trial interventions or trial conduct                                                                                                                                                     | N.A.  |
| 26 |                                 |     |                                                                                                                                                                                                                                                                                                                                       |       |
| 27 |                                 |     |                                                                                                                                                                                                                                                                                                                                       |       |
| 28 | Auditing                        | 23  | Frequency and procedures for auditing trial conduct, if any, and whether the process will be independent from investigators and the sponsor                                                                                                                                                                                           | N.A.  |
| 29 |                                 |     |                                                                                                                                                                                                                                                                                                                                       |       |
| 30 |                                 |     |                                                                                                                                                                                                                                                                                                                                       |       |
| 31 |                                 |     |                                                                                                                                                                                                                                                                                                                                       |       |
| 32 | <b>Ethics and dissemination</b> |     |                                                                                                                                                                                                                                                                                                                                       |       |
| 33 |                                 |     |                                                                                                                                                                                                                                                                                                                                       |       |
| 34 | Research ethics approval        | 24  | Plans for seeking research ethics committee/institutional review board (REC/IRB) approval                                                                                                                                                                                                                                             | N.A.  |
| 35 |                                 |     |                                                                                                                                                                                                                                                                                                                                       |       |
| 36 |                                 |     |                                                                                                                                                                                                                                                                                                                                       |       |
| 37 | Protocol amendments             | 25  | Plans for communicating important protocol modifications (eg, changes to eligibility criteria, outcomes, analyses) to relevant parties (eg, investigators, REC/IRBs, trial participants, trial registries, journals, regulators)                                                                                                      | 16-17 |
| 38 |                                 |     |                                                                                                                                                                                                                                                                                                                                       |       |
| 39 |                                 |     |                                                                                                                                                                                                                                                                                                                                       |       |
| 40 |                                 |     |                                                                                                                                                                                                                                                                                                                                       |       |
| 41 |                                 |     |                                                                                                                                                                                                                                                                                                                                       |       |
| 42 |                                 |     |                                                                                                                                                                                                                                                                                                                                       |       |
| 43 |                                 |     |                                                                                                                                                                                                                                                                                                                                       |       |
| 44 |                                 |     |                                                                                                                                                                                                                                                                                                                                       |       |
| 45 |                                 |     |                                                                                                                                                                                                                                                                                                                                       |       |
| 46 |                                 |     |                                                                                                                                                                                                                                                                                                                                       |       |

|    |                               |     |                                                                                                                                                                                                                                                                                     |       |
|----|-------------------------------|-----|-------------------------------------------------------------------------------------------------------------------------------------------------------------------------------------------------------------------------------------------------------------------------------------|-------|
| 1  | Consent or assent             | 26a | Who will obtain informed consent or assent from potential trial participants or authorised surrogates, and how (see Item 32)                                                                                                                                                        | 9, 16 |
| 2  |                               |     |                                                                                                                                                                                                                                                                                     |       |
| 3  |                               |     |                                                                                                                                                                                                                                                                                     |       |
| 4  |                               | 26b | Additional consent provisions for collection and use of participant data and biological specimens in ancillary studies, if applicable                                                                                                                                               | N.A.  |
| 5  |                               |     |                                                                                                                                                                                                                                                                                     |       |
| 6  |                               |     |                                                                                                                                                                                                                                                                                     |       |
| 7  | Confidentiality               | 27  | How personal information about potential and enrolled participants will be collected, shared, and maintained in order to protect confidentiality before, during, and after the trial                                                                                                | 16    |
| 8  |                               |     |                                                                                                                                                                                                                                                                                     |       |
| 9  |                               |     |                                                                                                                                                                                                                                                                                     |       |
| 10 | Declaration of interests      | 28  | Financial and other competing interests for principal investigators for the overall trial and each study site                                                                                                                                                                       | 18    |
| 11 |                               |     |                                                                                                                                                                                                                                                                                     |       |
| 12 |                               |     |                                                                                                                                                                                                                                                                                     |       |
| 13 | Access to data                | 29  | Statement of who will have access to the final trial dataset, and disclosure of contractual agreements that limit such access for investigators                                                                                                                                     | N.A.  |
| 14 |                               |     |                                                                                                                                                                                                                                                                                     |       |
| 15 |                               |     |                                                                                                                                                                                                                                                                                     |       |
| 16 | Ancillary and post-trial care | 30  | Provisions, if any, for ancillary and post-trial care, and for compensation to those who suffer harm from trial participation                                                                                                                                                       | N.A.  |
| 17 |                               |     |                                                                                                                                                                                                                                                                                     |       |
| 18 |                               |     |                                                                                                                                                                                                                                                                                     |       |
| 19 |                               |     |                                                                                                                                                                                                                                                                                     |       |
| 20 | Dissemination policy          | 31a | Plans for investigators and sponsor to communicate trial results to participants, healthcare professionals, the public, and other relevant groups (eg, via publication, reporting in results databases, or other data sharing arrangements), including any publication restrictions | 16-17 |
| 21 |                               |     |                                                                                                                                                                                                                                                                                     |       |
| 22 |                               |     |                                                                                                                                                                                                                                                                                     |       |
| 23 |                               |     |                                                                                                                                                                                                                                                                                     |       |
| 24 |                               | 31b | Authorship eligibility guidelines and any intended use of professional writers                                                                                                                                                                                                      | N.A.  |
| 25 |                               |     |                                                                                                                                                                                                                                                                                     |       |
| 26 |                               | 31c | Plans, if any, for granting public access to the full protocol, participant-level dataset, and statistical code                                                                                                                                                                     | 16-17 |
| 27 |                               |     |                                                                                                                                                                                                                                                                                     |       |
| 28 |                               |     |                                                                                                                                                                                                                                                                                     |       |
| 29 | <b>Appendices</b>             |     |                                                                                                                                                                                                                                                                                     |       |
| 30 |                               |     |                                                                                                                                                                                                                                                                                     |       |
| 31 | Informed consent materials    | 32  | Model consent form and other related documentation given to participants and authorised surrogates                                                                                                                                                                                  | N.A.  |
| 32 |                               |     |                                                                                                                                                                                                                                                                                     |       |
| 33 |                               |     |                                                                                                                                                                                                                                                                                     |       |
| 34 | Biological specimens          | 33  | Plans for collection, laboratory evaluation, and storage of biological specimens for genetic or molecular analysis in the current trial and for future use in ancillary studies, if applicable                                                                                      | N.A.  |
| 35 |                               |     |                                                                                                                                                                                                                                                                                     |       |
| 36 |                               |     |                                                                                                                                                                                                                                                                                     |       |

\*It is strongly recommended that this checklist be read in conjunction with the SPIRIT 2013 Explanation & Elaboration for important clarification on the items. Amendments to the protocol should be tracked and dated. The SPIRIT checklist is copyrighted by the SPIRIT Group under the Creative Commons "[Attribution-NonCommercial-NoDerivs 3.0 Unported](https://creativecommons.org/licenses/by-nc-nd/3.0/)" license.
